# Supplementary material for: A Co-Expression Network in Hexaploid Wheat Reveals Mostly Balanced Expression and Lack of Significant Gene Loss of Homeologous Meiotic Genes Upon Polyploidization
Source: Front Plant Sci. 2019 Oct 18;10:1325. doi: 10.3389/fpls.2019.01325 (PMC6813927; doi:10.3389/fpls.2019.01325)
Supplement: Supplementary file 14 [file Table_10.xlsx]

## Sheet: Expressed triads
Table S10. Defining the expressed triads in meiotic anther tissue. Triad is considered as expressed when one of its homeologs is expressed according to the criterion used in our WGCNA analysis.
	(In this study, a gene was considered expressed when its expression > 0.5 TPM in one sample at least)
	Homeolog			Homeolog max expression in meiotic anther (TPM)
	A	B	D	A	B	D	Max TPM in triad	Expressed triad
1	TraesCS1A02G001800	TraesCS1B02G000600	TraesCS1D02G003700	40.0844	48.751	53.8347	53.8347	YES
2	TraesCS1A02G001900	TraesCS1B02G000800	TraesCS1D02G003900	27.0061	21.81	23.9259	27.0061	YES
3	TraesCS1A02G002000	TraesCS1B02G000900	TraesCS1D02G004000	7.28192	10.2918	5.75222	10.2918	YES
4	TraesCS1A02G002100	TraesCS1B02G001000	TraesCS1D02G004100	7.38097	6.56827	8.03426	8.03426	YES
5	TraesCS1A02G002200	TraesCS1B02G001100	TraesCS1D02G004200	73.5859	120.118	141.918	141.918	YES
6	TraesCS1A02G002300	TraesCS1B02G001600	TraesCS1D02G004400	2.19946	2.75061	2.56343	2.75061	YES
7	TraesCS1A02G002700	TraesCS1B02G002000	TraesCS1D02G004900	13.6229	13.9315	17.4406	17.4406	YES
8	TraesCS1A02G004200	TraesCS1B02G005600	TraesCS1D02G003300	54.6194	17.7188	51.971	54.6194	YES
9	TraesCS1A02G004800	TraesCS1B02G009600	TraesCS5D02G365500	0.0552538	0	0.0295073	0.0552538	NO
10	TraesCS1A02G005100	TraesCS1B02G006600	TraesCS1D02G001900	2.48602	1.36121	0.806715	2.48602	YES
11	TraesCS1A02G005300	TraesCS1B02G008600	TraesCS3D02G452200	0	2.30901	2.2742	2.30901	YES
12	TraesCS1A02G005500	TraesCS1B02G007700	TraesCS1D02G002200	11.7666	15.7641	18.9104	18.9104	YES
13	TraesCS1A02G005600	TraesCS1B02G007800	TraesCS1D02G002300	11.8768	16.3339	9.62306	16.3339	YES
14	TraesCS1A02G005700	TraesCS1B02G007900	TraesCS1D02G002400	21.5964	16.4737	21.6721	21.6721	YES
15	TraesCS1A02G005800	TraesCS1B02G008000	TraesCS1D02G002500	13.3633	17.8575	13.6253	17.8575	YES
16	TraesCS1A02G005900	TraesCS1B02G008200	TraesCS1D02G002600	13.2264	18.8199	13.2986	18.8199	YES
17	TraesCS1A02G007500	TraesCS1B02G011100	TraesCS1D02G000800	56.6093	40.5303	49.5893	56.6093	YES
18	TraesCS1A02G007600	TraesCS1B02G011200	TraesCS1D02G000900	0.489601	0.409664	11.7594	11.7594	YES
19	TraesCS1A02G007700	TraesCS1B02G011300	TraesCS1D02G000700	0	0	0	0	NO
20	TraesCS1A02G007900	TraesCS1B02G011500	TraesCS1D02G000400	0	49.7857	45.3451	49.7857	YES
21	TraesCS1A02G008800	TraesCS1B02G013600	TraesCS1D02G007500	0.0445026	0	0.0349948	0.0445026	NO
22	TraesCS1A02G009000	TraesCS1B02G013900	TraesCS1D02G007800	11.5257	10.1712	9.51517	11.5257	YES
23	TraesCS1A02G009400	TraesCS1B02G014900	TraesCS1D02G009300	0.353136	0	0.216607	0.353136	NO
24	TraesCS1A02G010100	TraesCS1B02G013000	TraesCS1D02G008400	0	0.104647	0	0.104647	NO
25	TraesCS1A02G010500	TraesCS7B02G494000	TraesCS7D02G544700	0	0	0	0	NO
26	TraesCS1A02G010800	TraesCS1B02G013200	TraesCS1D02G006600	0	0.0877324	0.0261148	0.0877324	NO
27	TraesCS1A02G011200	TraesCS1B02G037900	TraesCS1D02G010000	4.2091	7.61752	4.61244	7.61752	YES
28	TraesCS1A02G011400	TraesCS1B02G016900	TraesCS1D02G010600	0.717027	0.261841	3.45931	3.45931	YES
29	TraesCS1A02G012400	TraesCS7B02G243900	TraesCS1D02G012200	2.84828	4.14541	1.77074	4.14541	YES
30	TraesCS1A02G012500	TraesCS1B02G017200	TraesCS1D02G010700	5.07927	9.48905	7.82547	9.48905	YES
31	TraesCS1A02G012600	TraesCS1B02G017300	TraesCS1D02G010800	0.0173297	0.0342339	0.0351019	0.0351019	NO
32	TraesCS1A02G013200	TraesCS1B02G012300	TraesCS1D02G011300	0.06961	0	0.107144	0.107144	NO
33	TraesCS1A02G013400	TraesCS1B02G017400	TraesCS1D02G011500	0	0	0	0	NO
34	TraesCS1A02G013700	TraesCS1B02G017900	TraesCS1D02G011600	13.1139	11.6503	7.3086	13.1139	YES
35	TraesCS1A02G013800	TraesCS1B02G017800	TraesCS1D02G011700	44.1082	16.082	31.1082	44.1082	YES
36	TraesCS1A02G014000	TraesCS1B02G018000	TraesCS1D02G011900	0.0763229	0.0813771	0	0.0813771	NO
37	TraesCS1A02G014500	TraesCS1B02G323000	TraesCS1D02G311500	0	0.397287	0.751892	0.751892	YES
38	TraesCS1A02G014800	TraesCS1B02G017700	TraesCS1D02G012600	5.18369	290.643	40.8017	290.643	YES
39	TraesCS1A02G015200	TraesCS1B02G019200	TraesCS1D02G013100	13.0883	13.243	9.03639	13.243	YES
40	TraesCS1A02G015300	TraesCS1B02G019100	TraesCS1D02G013200	20.6874	14.1043	22.8389	22.8389	YES
41	TraesCS1A02G015500	TraesCS1B02G018800	TraesCS1D02G013400	0	0	0.0281238	0.0281238	NO
42	TraesCS1A02G015800	TraesCS1B02G019800	TraesCS1D02G013700	0	0.0234024	0.0233731	0.0234024	NO
43	TraesCS1A02G016100	TraesCS1B02G018300	TraesCS1D02G013900	0.0802513	0	0	0.0802513	NO
44	TraesCS1A02G016300	TraesCS1B02G020200	TraesCS1D02G014900	0.0162035	0.0161248	0	0.0162035	NO
45	TraesCS1A02G016400	TraesCS1B02G020400	TraesCS1D02G016900	0.0295596	0.00618808	0	0.0295596	NO
46	TraesCS1A02G016800	TraesCS1B02G021400	TraesCS1D02G017200	0.0280362	0	0	0.0280362	NO
47	TraesCS1A02G016900	TraesCS1B02G021300	TraesCS1D02G016500	7.15371	4.41682	6.00558	7.15371	YES
48	TraesCS1A02G018000	TraesCS1B02G022400	TraesCS1D02G017800	0.0117281	0	0.0644512	0.0644512	NO
49	TraesCS1A02G018700	TraesCS1B02G022500	TraesCS1D02G018100	0.103039	0.142987	0.530461	0.530461	YES
50	TraesCS1A02G018900	TraesCS1B02G022700	TraesCS1D02G018200	13.1986	13.8592	8.77701	13.8592	YES
51	TraesCS1A02G019000	TraesCS1B02G022800	TraesCS1D02G018300	62.502	79.8461	55.9379	79.8461	YES
52	TraesCS1A02G019200	TraesCS1B02G022900	TraesCS1D02G018400	6.73924	6.45178	2.84012	6.73924	YES
53	TraesCS1A02G019900	TraesCS1B02G024000	TraesCS1D02G019400	0	0	0	0	NO
54	TraesCS1A02G020300	TraesCS1B02G024300	TraesCS1D02G019800	7.5513	32.3643	4.19325	32.3643	YES
55	TraesCS1A02G020400	TraesCS1B02G024400	TraesCS1D02G019900	2.09427	1.24425	2.07695	2.09427	YES
56	TraesCS1A02G020500	TraesCS1B02G024500	TraesCS1D02G020000	118.95	118.288	95.458	118.95	YES
57	TraesCS1A02G020600	TraesCS1B02G024600	TraesCS1D02G020100	8.31106	7.78151	5.603	8.31106	YES
58	TraesCS1A02G020700	TraesCS1B02G024700	TraesCS1D02G020200	2.20667	0.590938	0.0754377	2.20667	YES
59	TraesCS1A02G020800	TraesCS7B02G467000	TraesCS1D02G020400	0.0211432	0.0524468	0	0.0524468	NO
60	TraesCS1A02G022400	TraesCS1B02G026200	TraesCS1D02G022300	0	0.0165101	0	0.0165101	NO
61	TraesCS1A02G023300	TraesCS1B02G029000	TraesCS1D02G022800	0.0804469	0.0364163	0.034435	0.0804469	NO
62	TraesCS1A02G023400	TraesCS1B02G029100	TraesCS1D02G022900	2.83349	4.24439	3.86331	4.24439	YES
63	TraesCS1A02G023800	TraesCS1B02G030000	TraesCS1D02G023400	5.84196	6.40209	8.26439	8.26439	YES
64	TraesCS1A02G024100	TraesCS1B02G030400	TraesCS1D02G024200	0.0101837	0	0	0.0101837	NO
65	TraesCS1A02G024200	TraesCS1B02G030500	TraesCS1D02G024300	7.84143	0.16038	6.8458	7.84143	YES
66	TraesCS1A02G024600	TraesCS1B02G031000	TraesCS1D02G024700	7.55999	4.74411	11.2204	11.2204	YES
67	TraesCS1A02G024700	TraesCS1B02G031100	TraesCS1D02G024800	4.77906	5.49167	5.57438	5.57438	YES
68	TraesCS1A02G025100	TraesCS1B02G031500	TraesCS1D02G025100	19.9604	21.3579	24.371	24.371	YES
69	TraesCS1A02G025200	TraesCS1B02G031600	TraesCS1D02G025400	51.2569	62.6157	51.6156	62.6157	YES
70	TraesCS1A02G025700	TraesCS1B02G032600	TraesCS1D02G026100	2.65148	2.51553	3.33523	3.33523	YES
71	TraesCS1A02G025800	TraesCS3B02G508500	TraesCS3D02G459800	0.180636	2.03653	0	2.03653	YES
72	TraesCS1A02G025900	TraesCS1B02G032500	TraesCS1D02G026200	3.43772	3.7153	3.47104	3.7153	YES
73	TraesCS1A02G026000	TraesCS1B02G032400	TraesCS1D02G026300	0.392877	0.272942	0.334693	0.392877	NO
74	TraesCS1A02G027300	TraesCS1B02G033200	TraesCS1D02G026500	1.04576	0.558858	0.867318	1.04576	YES
75	TraesCS1A02G027600	TraesCS1B02G033500	TraesCS1D02G026800	5.52984	0	0.011725	5.52984	YES
76	TraesCS1A02G028700	TraesCS1B02G034500	TraesCS1D02G028200	3.79145	0.506056	0.0370344	3.79145	YES
77	TraesCS1A02G029200	TraesCS1B02G036400	TraesCS1D02G029400	10.2184	6.35955	7.81628	10.2184	YES
78	TraesCS1A02G029300	TraesCS1B02G036500	TraesCS1D02G029500	43.9786	10.1018	29.1576	43.9786	YES
79	TraesCS1A02G029400	TraesCS1B02G036600	TraesCS1D02G029600	0	0.035711	0.0261506	0.035711	NO
80	TraesCS1A02G029700	TraesCS6B02G428200	TraesCS7D02G123300	0.129725	0.0854974	0.00987869	0.129725	NO
81	TraesCS1A02G029800	TraesCS1B02G036900	TraesCS1D02G030300	15.1377	10.3978	17.3874	17.3874	YES
82	TraesCS1A02G029900	TraesCS1B02G037000	TraesCS1D02G030400	0.017142	0.270144	0.113732	0.270144	NO
83	TraesCS1A02G030100	TraesCS1B02G037100	TraesCS1D02G030600	7.22694	25.5517	12.9968	25.5517	YES
84	TraesCS1A02G030200	TraesCS1B02G037200	TraesCS1D02G030700	0.147509	0.359331	0.235939	0.359331	NO
85	TraesCS1A02G030300	TraesCS1B02G037400	TraesCS1D02G030800	0	0	0	0	NO
86	TraesCS1A02G030500	TraesCS1B02G037600	TraesCS1D02G031400	4.12755	5.76706	5.9603	5.9603	YES
87	TraesCS1A02G030600	TraesCS1B02G037700	TraesCS1D02G031500	17.8517	16.9325	12.1183	17.8517	YES
88	TraesCS1A02G030700	TraesCS1B02G038100	TraesCS1D02G031700	1.2838	1.41538	1.51421	1.51421	YES
89	TraesCS1A02G031100	TraesCS1B02G038900	TraesCS1D02G032500	0.0185442	0	0	0.0185442	NO
90	TraesCS1A02G031200	TraesCS1B02G038800	TraesCS1D02G032600	3.40589	5.08805	3.83005	5.08805	YES
91	TraesCS1A02G031300	TraesCS1B02G038700	TraesCS1D02G032700	0.273498	0.0335725	0.0334493	0.273498	NO
92	TraesCS1A02G031600	TraesCS1B02G039620	TraesCS1D02G033205	0.535458	0.564033	0.691454	0.691454	YES
93	TraesCS1A02G031700	TraesCS1B02G038300	TraesCS1D02G032300	0.529688	0.547335	0	0.547335	YES
94	TraesCS1A02G031800	TraesCS1B02G039500	TraesCS1D02G033300	0	0	0.00972924	0.00972924	NO
95	TraesCS1A02G031900	TraesCS1B02G039800	TraesCS1D02G033400	0	0	0	0	NO
96	TraesCS1A02G032000	TraesCS1B02G040400	TraesCS1D02G033700	0.125815	0	0	0.125815	NO
97	TraesCS1A02G033000	TraesCS1B02G041300	TraesCS1D02G034200	13.6167	25.3156	15.7954	25.3156	YES
98	TraesCS1A02G033100	TraesCS1B02G041200	TraesCS1D02G034100	20.6596	42.0527	34.8168	42.0527	YES
99	TraesCS1A02G033200	TraesCS1B02G041400	TraesCS1D02G034600	0.0906702	0.0623658	0.151259	0.151259	NO
100	TraesCS1A02G033300	TraesCS1B02G041900	TraesCS1D02G035000	10.3033	11.0286	25.8659	25.8659	YES
101	TraesCS1A02G033500	TraesCS1B02G042300	TraesCS1D02G034700	7.92301	12.8613	58.3379	58.3379	YES
102	TraesCS1A02G033800	TraesCS1B02G042000	TraesCS1D02G034900	5.98139	4.47569	4.94875	5.98139	YES
103	TraesCS1A02G034300	TraesCS1B02G050200	TraesCS1D02G035300	16.9229	23.1546	17.941	23.1546	YES
104	TraesCS1A02G034500	TraesCS1B02G050500	TraesCS1D02G035900	0	0	0	0	NO
105	TraesCS1A02G034800	TraesCS5B02G553600	TraesCS3D02G108200	0	0	0.0583087	0.0583087	NO
106	TraesCS1A02G035000	TraesCS1B02G051100	TraesCS1D02G036300	6.78704	5.79568	6.37979	6.78704	YES
107	TraesCS1A02G035100	TraesCS1B02G044800	TraesCS1D02G036500	0.3994	7.51325	7.0537	7.51325	YES
108	TraesCS1A02G035200	TraesCS1B02G045000	TraesCS1D02G036700	1.62795	1.70735	1.75582	1.75582	YES
109	TraesCS1A02G035300	TraesCS1B02G045100	TraesCS1D02G036800	2.3637	0.992012	1.38062	2.3637	YES
110	TraesCS1A02G035800	TraesCS1B02G045700	TraesCS7D02G136800	239.749	273.067	311.566	311.566	YES
111	TraesCS1A02G036000	TraesCS1B02G046400	TraesCS1D02G037600	0	0	0	0	NO
112	TraesCS1A02G036100	TraesCS1B02G046300	TraesCS1D02G037700	8.61834	9.366	5.19598	9.366	YES
113	TraesCS1A02G036200	TraesCS1B02G046200	TraesCS1D02G037900	1.94638	2.11076	0.921614	2.11076	YES
114	TraesCS1A02G036300	TraesCS1B02G047000	TraesCS1D02G038000	3.37983	3.3901	3.03626	3.3901	YES
115	TraesCS1A02G036600	TraesCS1B02G047300	TraesCS1D02G038200	0	0	0	0	NO
116	TraesCS1A02G036700	TraesCS1B02G047400	TraesCS1D02G038300	0.197391	0.455866	0.265657	0.455866	NO
117	TraesCS1A02G037200	TraesCS1B02G047600	TraesCS1D02G038900	0.0976436	0.221005	0.079815	0.221005	NO
118	TraesCS1A02G037400	TraesCS1B02G047900	TraesCS1D02G039000	0.358651	0.0750707	0.249193	0.358651	NO
119	TraesCS1A02G037500	TraesCS1B02G048700	TraesCS1D02G039100	9.68752	5.63183	0	9.68752	YES
120	TraesCS1A02G037600	TraesCS1B02G048000	TraesCS1D02G039200	0.0312492	0	0	0.0312492	NO
121	TraesCS1A02G037800	TraesCS1B02G048500	TraesCS1D02G039500	0.412815	0.118477	0.104455	0.412815	NO
122	TraesCS1A02G037900	TraesCS1B02G048800	TraesCS1D02G039600	18.7439	25.7769	34.8797	34.8797	YES
123	TraesCS1A02G038100	TraesCS1B02G048900	TraesCS1D02G039800	586.5	697.292	715.184	715.184	YES
124	TraesCS1A02G038200	TraesCS1B02G049100	TraesCS1D02G039900	805.558	999.246	781.161	999.246	YES
125	TraesCS1A02G038300	TraesCS1B02G049200	TraesCS1D02G040000	0.356682	34.0423	12.2418	34.0423	YES
126	TraesCS1A02G038400	TraesCS1B02G049300	TraesCS1D02G040100	14.8744	14.8801	16.5581	16.5581	YES
127	TraesCS1A02G039100	TraesCS1B02G051600	TraesCS1D02G040700	1.98859	9.34732	5.44036	9.34732	YES
128	TraesCS1A02G039200	TraesCS1B02G051700	TraesCS1D02G040800	4.02408	7.22199	5.38513	7.22199	YES
129	TraesCS1A02G039800	TraesCS1B02G052800	TraesCS1D02G042100	0.0202071	0.0460667	0.0193095	0.0460667	NO
130	TraesCS1A02G039900	TraesCS1B02G052900	TraesCS1D02G041900	0	0.324512	0.0491071	0.324512	NO
131	TraesCS1A02G040200	TraesCS1B02G053000	TraesCS1D02G041700	0.0342944	0	0	0.0342944	NO
132	TraesCS1A02G040300	TraesCS1B02G053100	TraesCS1D02G041600	0.0527268	0	0.069193	0.069193	NO
133	TraesCS1A02G040400	TraesCS1B02G053400	TraesCS1D02G041400	4.92818	3.58497	3.3089	4.92818	YES
134	TraesCS1A02G040500	TraesCS1B02G053500	TraesCS1D02G041300	27.4071	7.71597	26.152	27.4071	YES
135	TraesCS1A02G040600	TraesCS1B02G053600	TraesCS1D02G041200	29.1152	59.2725	35.2127	59.2725	YES
136	TraesCS1A02G040900	TraesCS1B02G053700	TraesCS1D02G042300	1.15389	0.394657	1.23523	1.23523	YES
137	TraesCS1A02G041400	TraesCS1B02G034000	TraesCS1D02G027400	122.449	212.801	64.8959	212.801	YES
138	TraesCS1A02G041600	TraesCS1B02G033800	TraesCS1D02G027300	0	0	85.8611	85.8611	YES
139	TraesCS1A02G041700	TraesCS1B02G033700	TraesCS1D02G027200	0	0	0	0	NO
140	TraesCS1A02G042300	TraesCS1B02G054200	TraesCS1D02G042700	58.2131	20.8326	50.8529	58.2131	YES
141	TraesCS1A02G042400	TraesCS1B02G055000	TraesCS1D02G042800	0	0	0	0	NO
142	TraesCS1A02G042500	TraesCS1B02G054900	TraesCS1D02G042900	3.23225	6.30502	3.73517	6.30502	YES
143	TraesCS1A02G042700	TraesCS1B02G055200	TraesCS1D02G043300	0.964923	0.805834	0.998569	0.998569	YES
144	TraesCS1A02G042800	TraesCS1B02G055600	TraesCS1D02G043200	1.11228	2.2598	1.96561	2.2598	YES
145	TraesCS1A02G042900	TraesCS1B02G055800	TraesCS1D02G043400	2.11234	1.55491	1.61528	2.11234	YES
146	TraesCS1A02G043000	TraesCS1B02G056100	TraesCS1D02G043500	0	0.0932464	0	0.0932464	NO
147	TraesCS1A02G043100	TraesCS1B02G056000	TraesCS1D02G043600	0.0292185	0.0390133	0.0464915	0.0464915	NO
148	TraesCS1A02G043200	TraesCS1B02G055900	TraesCS1D02G043700	17.4528	22.1044	18.8489	22.1044	YES
149	TraesCS1A02G043300	TraesCS1B02G056300	TraesCS1D02G043900	0.0675711	0	0.037405	0.0675711	NO
150	TraesCS1A02G043400	TraesCS1B02G056400	TraesCS1D02G044000	5.2309	8.17419	7.88756	8.17419	YES
151	TraesCS1A02G043500	TraesCS1B02G056600	TraesCS1D02G044100	1.64542	0.488389	1.89354	1.89354	YES
152	TraesCS1A02G043600	TraesCS1B02G056700	TraesCS1D02G044200	17.1758	19.5591	21.0738	21.0738	YES
153	TraesCS1A02G043800	TraesCS1B02G057000	TraesCS1D02G044500	0	1.59132	0	1.59132	YES
154	TraesCS1A02G044200	TraesCS1B02G057100	TraesCS1D02G044700	14.8785	2.72938	7.83467	14.8785	YES
155	TraesCS1A02G044500	TraesCS1B02G057800	TraesCS1D02G045100	14.3699	16.9132	16.5948	16.9132	YES
156	TraesCS1A02G044600	TraesCS1B02G057900	TraesCS1D02G045200	5.89286	17.1944	5.4466	17.1944	YES
157	TraesCS1A02G044800	TraesCS1B02G058000	TraesCS1D02G045400	11.6754	11.6923	14.0008	14.0008	YES
158	TraesCS1A02G044900	TraesCS1B02G058100	TraesCS1D02G045500	0	0.0863766	1.00654	1.00654	YES
159	TraesCS1A02G045000	TraesCS1B02G058300	TraesCS1D02G045700	0	0.557273	0.107829	0.557273	YES
160	TraesCS1A02G045300	TraesCS1B02G058600	TraesCS1D02G046000	8.21393	6.85706	7.47372	8.21393	YES
161	TraesCS1A02G045400	TraesCS1B02G058700	TraesCS1D02G046100	4.95266	9.00083	6.40616	9.00083	YES
162	TraesCS1A02G045500	TraesCS1B02G058800	TraesCS1D02G046200	0.18446	0	0	0.18446	NO
163	TraesCS1A02G045800	TraesCS1B02G059000	TraesCS1D02G046400	19.7628	66.3072	93.9969	93.9969	YES
164	TraesCS1A02G046100	TraesCS1B02G059500	TraesCS1D02G046700	2.24868	2.50652	2.56017	2.56017	YES
165	TraesCS1A02G046300	TraesCS1B02G059800	TraesCS1D02G047100	3.39408	5.65497	5.24134	5.65497	YES
166	TraesCS1A02G046500	TraesCS1B02G060000	TraesCS1D02G047400	18.881	16.0866	18.3243	18.881	YES
167	TraesCS1A02G046600	TraesCS1B02G060100	TraesCS1D02G047600	14.1772	16.5085	9.42242	16.5085	YES
168	TraesCS1A02G046800	TraesCS1B02G060200	TraesCS1D02G047800	3.11026	1.77888	2.09363	3.11026	YES
169	TraesCS1A02G046900	TraesCS1B02G060300	TraesCS1D02G047700	8.02316	8.83949	4.20315	8.83949	YES
170	TraesCS1A02G047000	TraesCS1B02G060700	TraesCS1D02G047900	26.9716	31.4874	43.7985	43.7985	YES
171	TraesCS1A02G047200	TraesCS1B02G061200	TraesCS1D02G048200	5.84789	4.47185	5.18062	5.84789	YES
172	TraesCS1A02G047300	TraesCS1B02G061800	TraesCS1D02G048300	0	0.487696	0.0177869	0.487696	NO
173	TraesCS1A02G047700	TraesCS1B02G062100	TraesCS1D02G048800	0	0	0	0	NO
174	TraesCS1A02G048000	TraesCS1B02G062200	TraesCS1D02G048900	0.0754046	0.160298	0.0447862	0.160298	NO
175	TraesCS1A02G048100	TraesCS1B02G062300	TraesCS1D02G049000	0.145792	0.159589	0.306723	0.306723	NO
176	TraesCS1A02G048300	TraesCS1B02G062700	TraesCS1D02G049600	0.079224	0.0688332	0.795063	0.795063	YES
177	TraesCS1A02G048400	TraesCS1B02G062900	TraesCS1D02G049800	0.336702	3.74615	3.50018	3.74615	YES
178	TraesCS1A02G048900	TraesCS1B02G064400	TraesCS1D02G050100	0.390474	0.397597	0.613302	0.613302	YES
179	TraesCS1A02G049300	TraesCS1B02G065700	TraesCS1D02G051300	7.43254	7.07787	7.5676	7.5676	YES
180	TraesCS1A02G049500	TraesCS1B02G057200	TraesCS1D02G044800	0	0	0	0	NO
181	TraesCS1A02G049600	TraesCS1B02G066000	TraesCS1D02G052000	9.1268	3.14776	10.4439	10.4439	YES
182	TraesCS1A02G049700	TraesCS1B02G065900	TraesCS1D02G051900	46.4214	44.2391	46.2629	46.4214	YES
183	TraesCS1A02G050100	TraesCS1B02G066400	TraesCS1D02G052200	0.500323	0.0229628	0.0206022	0.500323	YES
184	TraesCS1A02G050300	TraesCS1B02G066700	TraesCS1D02G052600	6.33299	5.47357	8.11233	8.11233	YES
185	TraesCS1A02G050400	TraesCS1B02G066900	TraesCS1D02G052700	0	0.0247051	0.0427794	0.0427794	NO
186	TraesCS1A02G050600	TraesCS1B02G067000	TraesCS1D02G052800	118.375	2.67419	9.14711	118.375	YES
187	TraesCS1A02G050800	TraesCS1B02G067100	TraesCS1D02G052900	178.29	11.1211	135.434	178.29	YES
188	TraesCS1A02G051300	TraesCS1B02G068000	TraesCS1D02G053300	15.9595	12.9114	15.3863	15.9595	YES
189	TraesCS1A02G051400	TraesCS1B02G068100	TraesCS1D02G053400	0.140948	0.0722785	0.174041	0.174041	NO
190	TraesCS1A02G051500	TraesCS1B02G068200	TraesCS1D02G053500	39.803	49.6808	49.7045	49.7045	YES
191	TraesCS1A02G051600	TraesCS1B02G068300	TraesCS1D02G053600	12.6728	8.33556	0	12.6728	YES
192	TraesCS1A02G051700	TraesCS1B02G068500	TraesCS1D02G053700	105.724	149.411	227.609	227.609	YES
193	TraesCS1A02G051800	TraesCS1B02G068600	TraesCS1D02G053800	4.90122	1.25634	2.77572	4.90122	YES
194	TraesCS1A02G051900	TraesCS1B02G068700	TraesCS1D02G053900	57.1889	12.708	52.1641	57.1889	YES
195	TraesCS1A02G052000	TraesCS1B02G069000	TraesCS1D02G054000	4.46427	3.15384	6.91568	6.91568	YES
196	TraesCS1A02G052200	TraesCS1B02G069300	TraesCS2D02G215400	18.806	5.9981	7.55285	18.806	YES
197	TraesCS1A02G052300	TraesCS1B02G069200	TraesCS1D02G054200	5.25394	5.12449	7.58033	7.58033	YES
198	TraesCS1A02G054000	TraesCS1B02G071200	TraesCS1D02G054900	5.39095	5.25058	1.77283	5.39095	YES
199	TraesCS1A02G054200	TraesCS1B02G071300	TraesCS1D02G055000	0.0306612	0	0	0.0306612	NO
200	TraesCS1A02G054300	TraesCS1B02G071400	TraesCS1D02G055100	6.28206	6.19556	6.75077	6.75077	YES
201	TraesCS1A02G054400	TraesCS1B02G071500	TraesCS1D02G055200	6.13139	4.97168	5.77205	6.13139	YES
202	TraesCS1A02G054900	TraesCS1B02G071700	TraesCS1D02G055600	10.2221	8.4111	10.2426	10.2426	YES
203	TraesCS1A02G055000	TraesCS1B02G071800	TraesCS1D02G055700	2.63233	2.51131	2.85731	2.85731	YES
204	TraesCS1A02G055100	TraesCS1B02G071900	TraesCS1D02G055800	0	0	0	0	NO
205	TraesCS1A02G055200	TraesCS1B02G072000	TraesCS1D02G055900	8.22525	2.00385	8.0684	8.22525	YES
206	TraesCS1A02G055300	TraesCS1B02G072100	TraesCS1D02G056000	0.0741546	0.0325795	0.0751649	0.0751649	NO
207	TraesCS1A02G055400	TraesCS1B02G072200	TraesCS1D02G056100	4.81372	3.00389	3.12492	4.81372	YES
208	TraesCS1A02G056000	TraesCS1B02G073000	TraesCS1D02G056700	0.47629	0	0	0.47629	NO
209	TraesCS1A02G056100	TraesCS1B02G073300	TraesCS1D02G056800	0.551494	1.1667	0.129064	1.1667	YES
210	TraesCS1A02G056200	TraesCS1B02G073400	TraesCS1D02G056900	1.56641	0.975104	1.27741	1.56641	YES
211	TraesCS1A02G056500	TraesCS1B02G073600	TraesCS1D02G057200	6.46843	4.25532	6.80932	6.80932	YES
212	TraesCS1A02G056600	TraesCS1B02G073700	TraesCS1D02G057300	7.12745	2.6258	1.67286	7.12745	YES
213	TraesCS1A02G056900	TraesCS1B02G074300	TraesCS1D02G057600	0.0739501	0.0648021	0.608658	0.608658	YES
214	TraesCS1A02G057200	TraesCS1B02G075200	TraesCS1D02G058300	8.44222	6.90985	4.05355	8.44222	YES
215	TraesCS1A02G057400	TraesCS1B02G075000	TraesCS1D02G058200	0	0.505266	0.604251	0.604251	YES
216	TraesCS1A02G057800	TraesCS1B02G075500	TraesCS1D02G058600	0	2.99102	2.17039	2.99102	YES
217	TraesCS1A02G057900	TraesCS1B02G075600	TraesCS1D02G058700	0.13694	0.203494	0.161161	0.203494	NO
218	TraesCS1A02G058400	TraesCS1B02G076300	TraesCS1D02G059200	0.036593	0.154593	0.11789	0.154593	NO
219	TraesCS1A02G058500	TraesCS1B02G075900	TraesCS1D02G059600	0.985128	1.86118	1.30208	1.86118	YES
220	TraesCS1A02G058600	TraesCS1B02G076900	TraesCS1D02G059700	11.0354	13.0511	10.1604	13.0511	YES
221	TraesCS1A02G058700	TraesCS1B02G077000	TraesCS1D02G059800	0.280438	2.33194	0.555045	2.33194	YES
222	TraesCS1A02G058800	TraesCS1B02G077200	TraesCS1D02G059900	0	0	0	0	NO
223	TraesCS1A02G058900	TraesCS1B02G077300	TraesCS1D02G060000	1.25936	2.41076	4.59474	4.59474	YES
224	TraesCS1A02G059100	TraesCS1B02G077500	TraesCS1D02G060500	6.33928	21.7747	26.7118	26.7118	YES
225	TraesCS1A02G059200	TraesCS1B02G077600	TraesCS1D02G060600	0.484625	0.821881	1.93697	1.93697	YES
226	TraesCS1A02G059600	TraesCS1B02G077800	TraesCS1D02G060800	6.98513	1.23497	2.15688	6.98513	YES
227	TraesCS1A02G059700	TraesCS1B02G077900	TraesCS1D02G060900	0	0	0.508178	0.508178	YES
228	TraesCS1A02G059800	TraesCS1B02G078200	TraesCS1D02G061000	0.989705	1.33992	7.54138	7.54138	YES
229	TraesCS1A02G060100	TraesCS1B02G078600	TraesCS1D02G061100	11.708	13.9123	12.5407	13.9123	YES
230	TraesCS1A02G060200	TraesCS1B02G078700	TraesCS1D02G061200	0	0	0	0	NO
231	TraesCS1A02G060500	TraesCS1B02G078800	TraesCS1D02G061400	1.18487	2.03138	2.50983	2.50983	YES
232	TraesCS1A02G060600	TraesCS1B02G078900	TraesCS1D02G061500	10.7685	9.10547	8.33328	10.7685	YES
233	TraesCS1A02G060900	TraesCS1B02G079100	TraesCS1D02G061800	288.339	632.757	931.356	931.356	YES
234	TraesCS1A02G061400	TraesCS1B02G079800	TraesCS1D02G062200	1501.06	974.391	126.909	1501.06	YES
235	TraesCS1A02G061500	TraesCS1B02G079900	TraesCS1D02G062300	0.079393	0.0197004	0.0684733	0.079393	NO
236	TraesCS1A02G062000	TraesCS1B02G080300	TraesCS1D02G062900	0	3.28026	0.0702565	3.28026	YES
237	TraesCS1A02G062100	TraesCS1B02G080500	TraesCS1D02G063000	31.2794	29.5763	9.92163	31.2794	YES
238	TraesCS1A02G062200	TraesCS1B02G080600	TraesCS2D02G008400	0.0498382	0	0.0219447	0.0498382	NO
239	TraesCS1A02G062400	TraesCS1B02G080700	TraesCS1D02G063400	3.34065	5.55785	4.40138	5.55785	YES
240	TraesCS1A02G063500	TraesCS1B02G081400	TraesCS1D02G064000	1.60367	3.74866	1.45205	3.74866	YES
241	TraesCS1A02G063600	TraesCS1B02G081500	TraesCS1D02G064100	2.96948	3.45123	3.03209	3.45123	YES
242	TraesCS1A02G063800	TraesCS3B02G508700	TraesCS3D02G228300	0	0	0	0	NO
243	TraesCS1A02G064000	TraesCS1B02G081900	TraesCS1D02G064500	12.0723	17.4872	12.8173	17.4872	YES
244	TraesCS1A02G064100	TraesCS1B02G082100	TraesCS1D02G064700	9.25632	8.80421	10.7921	10.7921	YES
245	TraesCS1A02G064200	TraesCS1B02G082500	TraesCS1D02G065000	0	0	0.265912	0.265912	NO
246	TraesCS1A02G064500	TraesCS1B02G082600	TraesCS1D02G065100	0.0158994	0	0	0.0158994	NO
247	TraesCS1A02G064600	TraesCS1B02G082700	TraesCS1D02G065200	0	0	0.0142396	0.0142396	NO
248	TraesCS1A02G064800	TraesCS1B02G083100	TraesCS1D02G065600	8.10235	3.52468	5.00381	8.10235	YES
249	TraesCS1A02G065300	TraesCS1B02G083400	TraesCS1D02G066000	3.3476	1.92389	2.71331	3.3476	YES
250	TraesCS1A02G065400	TraesCS1B02G083500	TraesCS1D02G066100	25.8586	6.58912	12.1076	25.8586	YES
251	TraesCS1A02G065500	TraesCS1B02G083600	TraesCS1D02G066200	0	0.0595113	0.209324	0.209324	NO
252	TraesCS1A02G065600	TraesCS1B02G083800	TraesCS1D02G066600	1.87088	1.51682	3.15183	3.15183	YES
253	TraesCS1A02G065700	TraesCS1B02G083900	TraesCS1D02G066700	14.5693	12.3826	12.0316	14.5693	YES
254	TraesCS1A02G065800	TraesCS1B02G084000	TraesCS1D02G066800	6.44154	8.09194	3.22863	8.09194	YES
255	TraesCS1A02G065900	TraesCS1B02G084100	TraesCS1D02G066900	0.0664439	0.0298412	0.0148702	0.0664439	NO
256	TraesCS1A02G066000	TraesCS1B02G084200	TraesCS1D02G067000	1.96161	1.1908	1.89807	1.96161	YES
257	TraesCS1A02G066100	TraesCS1B02G084300	TraesCS1D02G067100	0	0	0	0	NO
258	TraesCS1A02G066200	TraesCS1B02G084500	TraesCS1D02G067200	4.87464	6.48588	6.8055	6.8055	YES
259	TraesCS1A02G066300	TraesCS1B02G084600	TraesCS1D02G067400	2.27924	5.00812	5.86217	5.86217	YES
260	TraesCS1A02G066400	TraesCS1B02G084700	TraesCS1D02G067500	0.550951	2.60146	2.815	2.815	YES
261	TraesCS1A02G066700	TraesCS1B02G085000	TraesCS1D02G067700	1.15232	0.87986	1.89704	1.89704	YES
262	TraesCS1A02G066800	TraesCS1B02G085100	TraesCS1D02G067800	8.36985	4.05558	7.26073	8.36985	YES
263	TraesCS1A02G066900	TraesCS1B02G085200	TraesCS1D02G067900	1.60788	1.3729	1.66902	1.66902	YES
264	TraesCS1A02G067200	TraesCS1B02G085500	TraesCS1D02G068000	1.73284	2.79349	2.41581	2.79349	YES
265	TraesCS1A02G067300	TraesCS1B02G085800	TraesCS1D02G068300	4.11827	4.00141	4.20608	4.20608	YES
266	TraesCS1A02G067900	TraesCS1B02G086100	TraesCS1D02G069300	0.448856	1.36962	1.33544	1.36962	YES
267	TraesCS1A02G068100	TraesCS1B02G086800	TraesCS1D02G069500	0.0333526	0.128937	0.183347	0.183347	NO
268	TraesCS1A02G068200	TraesCS1B02G086700	TraesCS1D02G069600	2.57634	4.21451	3.28206	4.21451	YES
269	TraesCS1A02G068300	TraesCS1B02G086600	TraesCS1D02G069700	9.95103	12.1211	17.4051	17.4051	YES
270	TraesCS1A02G068400	TraesCS1B02G086500	TraesCS1D02G069800	0.170461	0.737548	0.81867	0.81867	YES
271	TraesCS1A02G068500	TraesCS1B02G086400	TraesCS1D02G069900	0.274064	1.26069	0.625064	1.26069	YES
272	TraesCS1A02G068600	TraesCS1B02G086300	TraesCS1D02G070000	0	0	0	0	NO
273	TraesCS1A02G068700	TraesCS5B02G041500	TraesCS1D02G070100	0.0384257	0.0549795	0	0.0549795	NO
274	TraesCS1A02G069400	TraesCS1B02G087700	TraesCS1D02G072000	21.399	18.7881	21.7896	21.7896	YES
275	TraesCS1A02G069500	TraesCS1B02G087900	TraesCS1D02G072100	1.68824	0.833104	1.60215	1.68824	YES
276	TraesCS1A02G069700	TraesCS1B02G088000	TraesCS1D02G072300	6.57924	7.92054	8.53358	8.53358	YES
277	TraesCS1A02G069900	TraesCS1B02G088400	TraesCS1D02G072500	2.7082	4.40478	3.55413	4.40478	YES
278	TraesCS1A02G070200	TraesCS1B02G088600	TraesCS1D02G072700	2.92653	1.96422	3.04588	3.04588	YES
279	TraesCS1A02G070300	TraesCS1B02G088700	TraesCS1D02G072800	15.6666	20.9027	14.1373	20.9027	YES
280	TraesCS1A02G070400	TraesCS1B02G088900	TraesCS1D02G072900	6.72205	10.6955	7.20155	10.6955	YES
281	TraesCS1A02G070500	TraesCS1B02G089000	TraesCS1D02G073000	0.614481	1.93027	0.0591408	1.93027	YES
282	TraesCS1A02G070600	TraesCS1B02G089100	TraesCS1D02G073100	2.59083	6.68427	5.98707	6.68427	YES
283	TraesCS1A02G070800	TraesCS1B02G089500	TraesCS1D02G073200	0	0	0	0	NO
284	TraesCS1A02G070900	TraesCS1B02G089600	TraesCS1D02G073300	0.129769	0.242251	0.354316	0.354316	NO
285	TraesCS1A02G071300	TraesCS1B02G089700	TraesCS1D02G073600	1.6288	1.10519	1.03854	1.6288	YES
286	TraesCS1A02G071700	TraesCS1B02G090300	TraesCS1D02G074300	2.11229	2.41108	3.10055	3.10055	YES
287	TraesCS1A02G071800	TraesCS1B02G090400	TraesCS1D02G074400	17.4333	20.0462	15.383	20.0462	YES
288	TraesCS1A02G072000	TraesCS1B02G090500	TraesCS1D02G074500	19.1258	19.77	17.3287	19.77	YES
289	TraesCS1A02G072200	TraesCS1B02G090600	TraesCS1D02G074600	11.4142	6.83199	5.13327	11.4142	YES
290	TraesCS1A02G072500	TraesCS1B02G091300	TraesCS1D02G075400	7.12891	20.3288	79.6142	79.6142	YES
291	TraesCS1A02G072600	TraesCS1B02G091500	TraesCS1D02G075500	68.8587	53.5603	54.517	68.8587	YES
292	TraesCS1A02G072700	TraesCS1B02G091600	TraesCS1D02G075600	1.92216	0.927869	2.47337	2.47337	YES
293	TraesCS1A02G072800	TraesCS1B02G091700	TraesCS1D02G075700	3.95493	3.38761	3.34345	3.95493	YES
294	TraesCS1A02G073100	TraesCS1B02G092100	TraesCS1D02G076000	0.139655	0.0804879	0.0856974	0.139655	NO
295	TraesCS1A02G073200	TraesCS1B02G092000	TraesCS1D02G076100	0.0117987	0.0117893	0.0118448	0.0118448	NO
296	TraesCS1A02G073300	TraesCS1B02G091900	TraesCS1D02G076200	0.0544766	0.114313	0.140931	0.140931	NO
297	TraesCS1A02G073400	TraesCS1B02G091800	TraesCS1D02G076300	8.52215	10.6443	6.58817	10.6443	YES
298	TraesCS1A02G073900	TraesCS1B02G092400	TraesCS1D02G076600	0.939846	1.08634	1.97906	1.97906	YES
299	TraesCS1A02G074000	TraesCS1B02G092500	TraesCS1D02G076700	0.291682	0.439378	0.845394	0.845394	YES
300	TraesCS1A02G074100	TraesCS1B02G092700	TraesCS1D02G077000	0.411817	0	0.532409	0.532409	YES
301	TraesCS1A02G074300	TraesCS1B02G093000	TraesCS1D02G077200	0	0.105583	0.0998953	0.105583	NO
302	TraesCS1A02G074400	TraesCS1B02G093300	TraesCS1D02G077300	9.54872	8.73846	10.2843	10.2843	YES
303	TraesCS1A02G074800	TraesCS1B02G093400	TraesCS1D02G077400	9.86436	10.6296	13.1079	13.1079	YES
304	TraesCS1A02G074900	TraesCS1B02G093500	TraesCS1D02G077500	0.262699	0.463393	0.969614	0.969614	YES
305	TraesCS1A02G075000	TraesCS1B02G093600	TraesCS1D02G077600	34.9868	36.3315	61.7426	61.7426	YES
306	TraesCS1A02G075100	TraesCS1B02G093700	TraesCS1D02G077700	16.2821	14.6169	12.7535	16.2821	YES
307	TraesCS1A02G075600	TraesCS1B02G094200	TraesCS1D02G077900	4.24804	3.59942	3.67388	4.24804	YES
308	TraesCS1A02G075700	TraesCS1B02G094300	TraesCS1D02G078000	7.49701	6.29889	3.60059	7.49701	YES
309	TraesCS1A02G075900	TraesCS1B02G094400	TraesCS1D02G078300	1.70757	2.76552	1.35506	2.76552	YES
310	TraesCS1A02G076000	TraesCS1B02G094700	TraesCS1D02G078400	11.2115	13.9786	11.8753	13.9786	YES
311	TraesCS1A02G076100	TraesCS1B02G094600	TraesCS1D02G078500	8.24908	10.8148	8.118	10.8148	YES
312	TraesCS1A02G076200	TraesCS1B02G094500	TraesCS1D02G078600	0.0363262	0.027155	0.0179412	0.0363262	NO
313	TraesCS1A02G076900	TraesCS1B02G095000	TraesCS1D02G079100	3.11976	2.0393	2.32071	3.11976	YES
314	TraesCS1A02G077000	TraesCS1B02G095100	TraesCS1D02G079200	0	0.042681	0.0538549	0.0538549	NO
315	TraesCS1A02G077200	TraesCS1B02G095200	TraesCS1D02G079300	16.1755	15.2772	10.5675	16.1755	YES
316	TraesCS1A02G077300	TraesCS1B02G095400	TraesCS1D02G079500	0	0	0.0754029	0.0754029	NO
317	TraesCS1A02G077500	TraesCS1B02G095600	TraesCS1D02G079600	10.1033	10.4481	11.7831	11.7831	YES
318	TraesCS1A02G077600	TraesCS1B02G095700	TraesCS1D02G079700	5.9179	7.41857	6.70022	7.41857	YES
319	TraesCS1A02G077700	TraesCS1B02G095800	TraesCS1D02G079800	10.0356	1.8252	7.67592	10.0356	YES
320	TraesCS1A02G077800	TraesCS1B02G095900	TraesCS1D02G079900	2.68566	2.85395	2.7051	2.85395	YES
321	TraesCS1A02G077900	TraesCS1B02G096000	TraesCS1D02G080000	0.031186	0.0137053	0	0.031186	NO
322	TraesCS1A02G078000	TraesCS1B02G096100	TraesCS1D02G080100	0	0	0.0296434	0.0296434	NO
323	TraesCS1A02G078100	TraesCS1B02G096200	TraesCS1D02G080300	1.04203	0.175124	0.130286	1.04203	YES
324	TraesCS1A02G078200	TraesCS1B02G096300	TraesCS1D02G080400	0	0.0422037	0.053131	0.053131	NO
325	TraesCS1A02G078700	TraesCS1B02G096700	TraesCS1D02G080700	3.27194	6.32333	3.95653	6.32333	YES
326	TraesCS1A02G079300	TraesCS1B02G097000	TraesCS1D02G081000	0.680483	1.03832	0.55676	1.03832	YES
327	TraesCS1A02G079400	TraesCS1B02G096900	TraesCS1D02G080900	0.0187667	0.0422372	0.109074	0.109074	NO
328	TraesCS1A02G079500	TraesCS1B02G096800	TraesCS1D02G080800	0.0449212	0	0.0182175	0.0449212	NO
329	TraesCS1A02G079600	TraesCS1B02G097600	TraesCS1D02G081300	0.677326	0.892371	0.898391	0.898391	YES
330	TraesCS1A02G079700	TraesCS1B02G097700	TraesCS1D02G081400	28.3825	21.413	28.9326	28.9326	YES
331	TraesCS1A02G079800	TraesCS1B02G097800	TraesCS1D02G081500	8.38976	9.36268	9.04315	9.36268	YES
332	TraesCS1A02G080000	TraesCS1B02G098000	TraesCS1D02G081700	2.21243	6.67635	4.76399	6.67635	YES
333	TraesCS1A02G080100	TraesCS1B02G098100	TraesCS1D02G081800	7.6469	9.26937	6.55188	9.26937	YES
334	TraesCS1A02G080200	TraesCS1B02G098200	TraesCS1D02G081900	4.93886	4.00602	3.33888	4.93886	YES
335	TraesCS1A02G080300	TraesCS1B02G098300	TraesCS1D02G082000	1.5916	6.11062	4.40173	6.11062	YES
336	TraesCS1A02G080400	TraesCS1B02G098400	TraesCS1D02G082100	0.0235662	0	0.147348	0.147348	NO
337	TraesCS1A02G080700	TraesCS1B02G098700	TraesCS1D02G082600	16.8621	12.9736	14.906	16.8621	YES
338	TraesCS1A02G081200	TraesCS1B02G098800	TraesCS1D02G082800	0.168316	0.305525	1.3709	1.3709	YES
339	TraesCS1A02G081300	TraesCS1B02G099000	TraesCS1D02G082900	13.0044	11.4713	13.0342	13.0342	YES
340	TraesCS1A02G081400	TraesCS1B02G099100	TraesCS1D02G083000	5.07157	8.32788	11.0849	11.0849	YES
341	TraesCS1A02G081500	TraesCS1B02G099200	TraesCS1D02G083100	0.0968591	0.926916	2.39027	2.39027	YES
342	TraesCS1A02G082000	TraesCS1B02G099600	TraesCS1D02G083600	11.5165	7.0104	20.6156	20.6156	YES
343	TraesCS1A02G082200	TraesCS1B02G099800	TraesCS1D02G083700	2.93401	4.16984	4.94679	4.94679	YES
344	TraesCS1A02G082300	TraesCS1B02G099900	TraesCS1D02G083800	2.24803	2.93796	1.54035	2.93796	YES
345	TraesCS1A02G082500	TraesCS1B02G100100	TraesCS1D02G083900	53.561	145.469	167.357	167.357	YES
346	TraesCS1A02G082600	TraesCS1B02G100200	TraesCS1D02G084000	15.2277	16.3053	9.5911	16.3053	YES
347	TraesCS1A02G082700	TraesCS1B02G100300	TraesCS1D02G084100	0.62118	0.623113	0.163495	0.623113	YES
348	TraesCS1A02G083000	TraesCS1B02G100400	TraesCS1D02G084200	9.26052	10.4524	10.9712	10.9712	YES
349	TraesCS1A02G083100	TraesCS1B02G100600	TraesCS1D02G084400	0.859297	1.145	1.531	1.531	YES
350	TraesCS1A02G083300	TraesCS1B02G100700	TraesCS1D02G084500	0.74272	0.62713	0.636991	0.74272	YES
351	TraesCS1A02G083400	TraesCS1B02G100800	TraesCS1D02G084600	56.8784	50.0723	54.8752	56.8784	YES
352	TraesCS1A02G083500	TraesCS1B02G101000	TraesCS1D02G084700	8.63189	8.37669	9.31254	9.31254	YES
353	TraesCS1A02G083800	TraesCS1B02G101100	TraesCS1D02G084900	0.0833992	4.06067	0.828343	4.06067	YES
354	TraesCS1A02G084000	TraesCS1B02G101500	TraesCS1D02G085200	0.28493	1.05572	0.0186353	1.05572	YES
355	TraesCS1A02G084100	TraesCS1B02G101600	TraesCS1D02G085300	8.30375	14.7158	8.49471	14.7158	YES
356	TraesCS1A02G084200	TraesCS1B02G101700	TraesCS1D02G085400	11.3078	14.1138	11.111	14.1138	YES
357	TraesCS1A02G084300	TraesCS4B02G156500	TraesCS4D02G156100	4.68029	8.27127	6.68992	8.27127	YES
358	TraesCS1A02G084500	TraesCS1B02G101800	TraesCS1D02G085900	11.099	25.3049	26.968	26.968	YES
359	TraesCS1A02G084600	TraesCS1B02G101900	TraesCS1D02G086000	0	0	0.187961	0.187961	NO
360	TraesCS1A02G084800	TraesCS1B02G102000	TraesCS1D02G086200	0	0.0626197	0	0.0626197	NO
361	TraesCS1A02G084900	TraesCS1B02G102100	TraesCS1D02G086300	0.248255	2.50569	0.569592	2.50569	YES
362	TraesCS1A02G085000	TraesCS1B02G102200	TraesCS1D02G086400	4.25437	3.78394	3.47185	4.25437	YES
363	TraesCS1A02G085500	TraesCS1B02G102600	TraesCS1D02G086600	2.48722	4.20713	7.53603	7.53603	YES
364	TraesCS1A02G085600	TraesCS1B02G102700	TraesCS1D02G086700	23.9526	22.4907	40.3833	40.3833	YES
365	TraesCS1A02G085800	TraesCS2B02G076400	TraesCS1D02G087300	1.29712	0.3029	2.52505	2.52505	YES
366	TraesCS1A02G085900	TraesCS1B02G104000	TraesCS1D02G087400	4.64353	1.79976	2.37173	4.64353	YES
367	TraesCS1A02G086100	TraesCS1B02G104500	TraesCS1D02G087600	0.324071	0.513979	0.0607694	0.513979	YES
368	TraesCS1A02G086200	TraesCS1B02G104600	TraesCS1D02G087800	2.44942	5.38745	4.57327	5.38745	YES
369	TraesCS1A02G086300	TraesCS1B02G104700	TraesCS1D02G087900	0.0117654	0	0.011967	0.011967	NO
370	TraesCS1A02G086500	TraesCS1B02G104900	TraesCS1D02G088000	20.3515	18.4249	22.4873	22.4873	YES
371	TraesCS1A02G086600	TraesCS1B02G105100	TraesCS1D02G088100	28.7272	30.6354	29.1203	30.6354	YES
372	TraesCS1A02G086800	TraesCS1B02G105200	TraesCS1D02G088200	4.76851	8.56761	7.07651	8.56761	YES
373	TraesCS1A02G086900	TraesCS1B02G105300	TraesCS1D02G088300	6.62144	7.63793	7.39212	7.63793	YES
374	TraesCS1A02G087000	TraesCS1B02G105400	TraesCS1D02G088400	0.0558011	0.0480056	0.0340619	0.0558011	NO
375	TraesCS1A02G087100	TraesCS1B02G105700	TraesCS1D02G088700	0.269363	0.179007	0.783672	0.783672	YES
376	TraesCS1A02G087200	TraesCS1B02G105800	TraesCS1D02G089100	1.80148	5.01803	5.93077	5.93077	YES
377	TraesCS1A02G087900	TraesCS1B02G106900	TraesCS1D02G089200	11.5484	7.24345	9.14939	11.5484	YES
378	TraesCS1A02G088000	TraesCS1B02G107000	TraesCS1D02G089300	8.33979	8.0916	6.57688	8.33979	YES
379	TraesCS1A02G088100	TraesCS1B02G107100	TraesCS1D02G089400	10.1323	10.5851	13.6408	13.6408	YES
380	TraesCS1A02G088200	TraesCS1B02G107200	TraesCS1D02G089500	5.35769	6.35295	6.34849	6.35295	YES
381	TraesCS1A02G088300	TraesCS1B02G107300	TraesCS1D02G089900	0.0141781	0.0215261	0.0893322	0.0893322	NO
382	TraesCS1A02G088600	TraesCS1B02G107600	TraesCS1D02G090000	0.963413	2.1163	1.12556	2.1163	YES
383	TraesCS1A02G088700	TraesCS1B02G107700	TraesCS1D02G090100	0.128557	0.0397116	0.0812273	0.128557	NO
384	TraesCS1A02G088900	TraesCS1B02G107800	TraesCS1D02G090200	7.22772	9.72089	5.72765	9.72089	YES
385	TraesCS1A02G089200	TraesCS1B02G116800	TraesCS1D02G097500	0.230863	1.51318	0.386848	1.51318	YES
386	TraesCS1A02G089800	TraesCS1B02G117800	TraesCS1D02G098300	0.563698	0.690378	0.98572	0.98572	YES
387	TraesCS1A02G089900	TraesCS1B02G117900	TraesCS1D02G098400	49.1526	55.439	69.4041	69.4041	YES
388	TraesCS1A02G090000	TraesCS1B02G118000	TraesCS1D02G098500	11.8773	12.744	10.5198	12.744	YES
389	TraesCS1A02G090100	TraesCS1B02G118200	TraesCS1D02G098600	17.1612	22.291	22.2994	22.2994	YES
390	TraesCS1A02G090300	TraesCS1B02G118300	TraesCS1D02G098700	4.9519	5.52344	5.57381	5.57381	YES
391	TraesCS1A02G090600	TraesCS1B02G118400	TraesCS1D02G099200	10.3932	9.85359	10.2822	10.3932	YES
392	TraesCS1A02G090800	TraesCS1B02G118500	TraesCS1D02G099300	0.121532	0	0.295407	0.295407	NO
393	TraesCS1A02G091100	TraesCS1B02G118900	TraesCS1D02G099600	33.3905	34.2921	37.2439	37.2439	YES
394	TraesCS1A02G091200	TraesCS1B02G119000	TraesCS1D02G099700	6.04138	6.2652	3.36773	6.2652	YES
395	TraesCS1A02G091300	TraesCS1B02G119100	TraesCS1D02G099900	14.0435	13.3222	11.8278	14.0435	YES
396	TraesCS1A02G091400	TraesCS1B02G119200	TraesCS1D02G100000	2.11358	1.60857	2.48072	2.48072	YES
397	TraesCS1A02G091500	TraesCS1B02G119300	TraesCS1D02G100100	1.80151	4.2508	4.50518	4.50518	YES
398	TraesCS1A02G091600	TraesCS1B02G119400	TraesCS1D02G100200	0.835566	0.104803	0.284493	0.835566	YES
399	TraesCS1A02G092100	TraesCS1B02G119900	TraesCS1D02G100700	0.0156019	0.0183535	0.019567	0.019567	NO
400	TraesCS1A02G092700	TraesCS1B02G120300	TraesCS1D02G101200	37.3076	31.1841	13.8492	37.3076	YES
401	TraesCS1A02G092800	TraesCS1B02G120500	TraesCS1D02G101500	92.5916	81.7587	95.5415	95.5415	YES
402	TraesCS1A02G092900	TraesCS1B02G120600	TraesCS1D02G101600	527.123	512.955	565.362	565.362	YES
403	TraesCS1A02G093000	TraesCS1B02G121200	TraesCS1D02G101700	0.295394	0.542644	0.221133	0.542644	YES
404	TraesCS1A02G093200	TraesCS1B02G121500	TraesCS1D02G101800	2.7765	14.9804	1.17713	14.9804	YES
405	TraesCS1A02G093300	TraesCS1B02G121600	TraesCS1D02G101900	0.0540413	0.05759	0.179146	0.179146	NO
406	TraesCS1A02G093500	TraesCS1B02G121700	TraesCS1D02G102100	0.0503684	0.115331	0.0364258	0.115331	NO
407	TraesCS1A02G093900	TraesCS1B02G122000	TraesCS1D02G102500	15.9619	15.4414	15.4181	15.9619	YES
408	TraesCS1A02G094000	TraesCS1B02G122100	TraesCS1D02G102600	10.8692	7.7918	7.58111	10.8692	YES
409	TraesCS1A02G094100	TraesCS1B02G122200	TraesCS1D02G102700	0.18126	0.0937746	0.100634	0.18126	NO
410	TraesCS1A02G094200	TraesCS1B02G122300	TraesCS1D02G103000	4.0394	4.05836	7.34586	7.34586	YES
411	TraesCS1A02G094300	TraesCS1B02G125900	TraesCS1D02G106600	0	0	0	0	NO
412	TraesCS1A02G094500	TraesCS1B02G122600	TraesCS1D02G103100	6.29137	0.967156	6.88652	6.88652	YES
413	TraesCS1A02G094800	TraesCS1B02G122700	TraesCS1D02G103400	2.20787	0.62889	1.71556	2.20787	YES
414	TraesCS1A02G094900	TraesCS1B02G122800	TraesCS1D02G103500	2.04354	7.42412	5.58139	7.42412	YES
415	TraesCS1A02G095000	TraesCS1B02G123200	TraesCS1D02G104200	31.7766	32.1017	22.0288	32.1017	YES
416	TraesCS1A02G095100	TraesCS1B02G123100	TraesCS1D02G103800	35.8171	17.0335	17.0381	35.8171	YES
417	TraesCS1A02G095200	TraesCS1B02G123000	TraesCS1D02G103700	5.28723	4.04509	5.93776	5.93776	YES
418	TraesCS1A02G095300	TraesCS1B02G122900	TraesCS1D02G103600	0.1295	0.0538049	0.0617803	0.1295	NO
419	TraesCS1A02G095400	TraesCS1B02G128300	TraesCS1D02G104300	0.394588	2.46558	5.16775	5.16775	YES
420	TraesCS1A02G095500	TraesCS1B02G128100	TraesCS1D02G104400	7.45935	5.39501	11.4464	11.4464	YES
421	TraesCS1A02G095600	TraesCS1B02G128000	TraesCS1D02G104500	0.895938	1.98619	0.967632	1.98619	YES
422	TraesCS1A02G095800	TraesCS1B02G127900	TraesCS1D02G104800	0.774396	2.26505	1.0241	2.26505	YES
423	TraesCS1A02G096000	TraesCS1B02G127700	TraesCS1D02G105000	17.7185	20.3338	19.9459	20.3338	YES
424	TraesCS1A02G096100	TraesCS1B02G127600	TraesCS1D02G105100	31.2144	18.4103	15.0285	31.2144	YES
425	TraesCS1A02G096200	TraesCS1B02G127500	TraesCS1D02G105200	5.21633	0.869602	1.47405	5.21633	YES
426	TraesCS1A02G096300	TraesCS1B02G127400	TraesCS1D02G105300	0.12979	0.204415	0.078364	0.204415	NO
427	TraesCS1A02G096400	TraesCS1B02G127300	TraesCS1D02G105400	2.19355	2.22943	2.01073	2.22943	YES
428	TraesCS1A02G096500	TraesCS1B02G127200	TraesCS1D02G105500	310.343	245.834	381.808	381.808	YES
429	TraesCS1A02G096600	TraesCS1B02G127000	TraesCS1D02G105600	3.3675	3.6827	3.52292	3.6827	YES
430	TraesCS1A02G096700	TraesCS3B02G358500	TraesCS1D02G105700	0	0	0	0	NO
431	TraesCS1A02G097000	TraesCS1B02G126900	TraesCS1D02G105800	5.87193	5.46546	5.87669	5.87669	YES
432	TraesCS1A02G097100	TraesCS1B02G126800	TraesCS1D02G105900	1.86369	1.81183	4.43449	4.43449	YES
433	TraesCS1A02G097200	TraesCS1B02G126700	TraesCS1D02G106000	21.9752	17.8076	14.0305	21.9752	YES
434	TraesCS1A02G097300	TraesCS1B02G126600	TraesCS1D02G106100	0.703647	1.93051	1.84898	1.93051	YES
435	TraesCS1A02G097400	TraesCS1B02G126500	TraesCS1D02G106200	62.8225	55.7664	47.0361	62.8225	YES
436	TraesCS1A02G097500	TraesCS1B02G126300	TraesCS1D02G106300	3.90136	5.46152	4.71287	5.46152	YES
437	TraesCS1A02G097600	TraesCS1B02G126200	TraesCS1D02G106400	6.57198	3.08896	5.27735	6.57198	YES
438	TraesCS1A02G097700	TraesCS1B02G126100	TraesCS1D02G106500	218.073	218.852	227.754	227.754	YES
439	TraesCS1A02G098900	TraesCS1B02G125700	TraesCS1D02G106800	0	0.243779	0.0671014	0.243779	NO
440	TraesCS1A02G099000	TraesCS1B02G125400	TraesCS1D02G107000	8.66325	1.73341	2.19254	8.66325	YES
441	TraesCS1A02G099300	TraesCS1B02G125100	TraesCS1D02G107200	23.5826	22.2002	25.2452	25.2452	YES
442	TraesCS1A02G099400	TraesCS1B02G124800	TraesCS1D02G107300	9.78533	17.8145	13.3674	17.8145	YES
443	TraesCS1A02G099500	TraesCS1B02G124900	TraesCS1D02G107400	46.5062	61.9457	71.1219	71.1219	YES
444	TraesCS1A02G099600	TraesCS1B02G111800	TraesCS1D02G093100	0.902676	0.528794	0.917354	0.917354	YES
445	TraesCS1A02G099700	TraesCS1B02G111700	TraesCS1D02G093000	1.21551	1.80948	2.04868	2.04868	YES
446	TraesCS1A02G099900	TraesCS1B02G111600	TraesCS1D02G092900	1.82208	3.3584	2.51249	3.3584	YES
447	TraesCS1A02G100100	TraesCS1B02G111400	TraesCS1D02G092700	0.142974	0.232212	0.335515	0.335515	NO
448	TraesCS1A02G100200	TraesCS1B02G111300	TraesCS1D02G092600	5.45386	6.28621	3.1938	6.28621	YES
449	TraesCS1A02G100600	TraesCS1B02G110400	TraesCS1D02G092200	5.75059	6.16923	5.14516	6.16923	YES
450	TraesCS1A02G101100	TraesCS1B02G111900	TraesCS1D02G093200	0.611717	1.86411	1.9177	1.9177	YES
451	TraesCS1A02G101500	TraesCS5B02G570500	TraesCS6D02G104200	0.592726	0	0	0.592726	YES
452	TraesCS1A02G101700	TraesCS1B02G112200	TraesCS1D02G093300	0.458084	0.195411	0.590853	0.590853	YES
453	TraesCS1A02G101900	TraesCS1B02G112300	TraesCS1D02G093600	16.8189	11.0814	25.5321	25.5321	YES
454	TraesCS1A02G102100	TraesCS1B02G112500	TraesCS1D02G093700	0.673062	0	0.31241	0.673062	YES
455	TraesCS1A02G102200	TraesCS1B02G112600	TraesCS1D02G093800	0.763584	0.222838	0.868159	0.868159	YES
456	TraesCS1A02G102300	TraesCS1B02G112700	TraesCS1D02G093900	6.88546	3.76439	7.41922	7.41922	YES
457	TraesCS1A02G102500	TraesCS1B02G113300	TraesCS1D02G094400	17.7573	29.0808	31.9636	31.9636	YES
458	TraesCS1A02G102600	TraesCS1B02G113400	TraesCS1D02G094600	29.0697	24.8092	21.7243	29.0697	YES
459	TraesCS1A02G102800	TraesCS1B02G113700	TraesCS1D02G094900	0.491513	1.0011	0.322072	1.0011	YES
460	TraesCS1A02G102900	TraesCS1B02G113800	TraesCS1D02G095000	0.195794	0.382438	0.780361	0.780361	YES
461	TraesCS1A02G103000	TraesCS1B02G114300	TraesCS1D02G095100	0.0225209	0.0818914	0.0324674	0.0818914	NO
462	TraesCS1A02G103100	TraesCS1B02G114500	TraesCS1D02G095500	2.89271	3.60961	3.44431	3.60961	YES
463	TraesCS1A02G103300	TraesCS1B02G114600	TraesCS1D02G095800	0.0473559	0.118489	0	0.118489	NO
464	TraesCS1A02G103500	TraesCS5B02G011800	TraesCS5D02G019100	0	0.0190808	0	0.0190808	NO
465	TraesCS1A02G103700	TraesCS5B02G011600	TraesCS5D02G019200	0	0	0	0	NO
466	TraesCS1A02G103800	TraesCS5B02G011500	TraesCS5D02G019300	0	0	0	0	NO
467	TraesCS1A02G103900	TraesCS5B02G012000	TraesCS5D02G019400	0.861143	2.71861	1.19757	2.71861	YES
468	TraesCS1A02G104000	TraesCS1B02G114700	TraesCS1D02G095900	1.79536	1.70213	0.961014	1.79536	YES
469	TraesCS1A02G104200	TraesCS1B02G115800	TraesCS1D02G096300	0	0.0506243	0	0.0506243	NO
470	TraesCS1A02G104300	TraesCS1B02G115900	TraesCS1D02G096400	0.122202	0.0523698	0.0739556	0.122202	NO
471	TraesCS1A02G104600	TraesCS1B02G116000	TraesCS1D02G096800	0.251057	0.124464	0.09114	0.251057	NO
472	TraesCS1A02G104700	TraesCS1B02G116100	TraesCS1D02G096900	3.74106	4.36556	2.73239	4.36556	YES
473	TraesCS1A02G104800	TraesCS1B02G116300	TraesCS1D02G097100	0	0.0187582	0.0395062	0.0395062	NO
474	TraesCS1A02G105000	TraesCS1B02G116500	TraesCS1D02G097200	0	0	0	0	NO
475	TraesCS1A02G105100	TraesCS1B02G116600	TraesCS1D02G097300	0	0.350748	0	0.350748	NO
476	TraesCS1A02G105200	TraesCS5B02G058700	TraesCS2D02G330800	0	0	0	0	NO
477	TraesCS1A02G105300	TraesCS1B02G130800	TraesCS1D02G109900	0.819922	2.49287	0.832068	2.49287	YES
478	TraesCS1A02G105400	TraesCS1B02G130900	TraesCS1D02G109800	507.679	358.747	269.7	507.679	YES
479	TraesCS1A02G105500	TraesCS1B02G131000	TraesCS1D02G109700	18.8759	22.2841	21.3266	22.2841	YES
480	TraesCS1A02G105600	TraesCS1B02G131300	TraesCS1D02G109600	75.6464	66.9267	91.6783	91.6783	YES
481	TraesCS1A02G105700	TraesCS1B02G128700	TraesCS1D02G109300	2.13537	13.6231	8.74716	13.6231	YES
482	TraesCS1A02G105800	TraesCS1B02G128600	TraesCS1D02G109200	9.79939	7.27799	17.3524	17.3524	YES
483	TraesCS1A02G105900	TraesCS1B02G128500	TraesCS1D02G109100	4.08792	2.29565	3.47581	4.08792	YES
484	TraesCS1A02G106000	TraesCS1B02G128400	TraesCS1D02G109000	30.1924	38.0486	42.7651	42.7651	YES
485	TraesCS1A02G106100	TraesCS1B02G123400	TraesCS1D02G108900	21.2496	21.7022	18.8192	21.7022	YES
486	TraesCS1A02G106200	TraesCS1B02G123500	TraesCS1D02G108800	0.379997	0.101202	0.209633	0.379997	NO
487	TraesCS1A02G106300	TraesCS1B02G123600	TraesCS1D02G108700	3.61037	3.41134	4.17126	4.17126	YES
488	TraesCS1A02G106400	TraesCS1B02G123800	TraesCS1D02G108600	0.0362734	0	0	0.0362734	NO
489	TraesCS1A02G106500	TraesCS1B02G123900	TraesCS1D02G108500	3.20242	1.04513	1.54262	3.20242	YES
490	TraesCS1A02G106600	TraesCS1B02G124100	TraesCS1D02G108300	30.4655	43.5158	32.9629	43.5158	YES
491	TraesCS1A02G106800	TraesCS1B02G124300	TraesCS1D02G108000	0.129836	5.17446	2.27511	5.17446	YES
492	TraesCS1A02G107000	TraesCS1B02G124400	TraesCS1D02G107800	0.128179	0.118514	0.30969	0.30969	NO
493	TraesCS1A02G107100	TraesCS1B02G124500	TraesCS1D02G107700	0.0183649	0.0163626	0.0212214	0.0212214	NO
494	TraesCS1A02G107200	TraesCS1B02G124600	TraesCS1D02G107600	0.218972	0.450217	7.4553	7.4553	YES
495	TraesCS1A02G107300	TraesCS1B02G124700	TraesCS1D02G107500	12.1529	12.2158	13.3026	13.3026	YES
496	TraesCS1A02G107400	TraesCS1B02G109600	TraesCS1D02G091700	0	0.0278102	0.0426496	0.0426496	NO
497	TraesCS1A02G107500	TraesCS1B02G129500	TraesCS1D02G111600	0.0927167	0.0592604	0.0475419	0.0927167	NO
498	TraesCS1A02G107600	TraesCS1B02G129600	TraesCS1D02G111500	7.32315	10.4572	5.97813	10.4572	YES
499	TraesCS1A02G107700	TraesCS1B02G129800	TraesCS1D02G111400	3.2235	6.37622	1.93696	6.37622	YES
500	TraesCS1A02G107800	TraesCS1B02G129900	TraesCS1D02G111300	33.7998	31.9863	37.3902	37.3902	YES
501	TraesCS1A02G107900	TraesCS1B02G130100	TraesCS1D02G111100	18.1141	12.4926	23.1821	23.1821	YES
502	TraesCS1A02G108000	TraesCS1B02G130200	TraesCS1D02G111000	18.7578	28.5914	32.0057	32.0057	YES
503	TraesCS1A02G108100	TraesCS1B02G130300	TraesCS1D02G110900	3.1235	3.97709	3.73943	3.97709	YES
504	TraesCS1A02G108300	TraesCS1B02G130500	TraesCS1D02G110700	9.81846	2.83986	16.1697	16.1697	YES
505	TraesCS1A02G108800	TraesCS1B02G108100	TraesCS1D02G090300	1.51475	1.47505	1.49661	1.51475	YES
506	TraesCS1A02G108900	TraesCS1B02G108200	TraesCS1D02G090400	5.18524	5.77117	7.83836	7.83836	YES
507	TraesCS1A02G109200	TraesCS1B02G108700	TraesCS1D02G090900	10.6478	21.1781	13.4477	21.1781	YES
508	TraesCS1A02G109300	TraesCS1B02G108800	TraesCS1D02G091000	14.4356	20.3044	20.2556	20.3044	YES
509	TraesCS1A02G109400	TraesCS1B02G108900	TraesCS1D02G091100	2.10087	1.62792	2.41788	2.41788	YES
510	TraesCS1A02G109500	TraesCS1B02G109000	TraesCS1D02G091200	3.54915	2.64479	4.03139	4.03139	YES
511	TraesCS1A02G109600	TraesCS1B02G109100	TraesCS1D02G091300	0.447286	0.968424	0.0559699	0.968424	YES
512	TraesCS1A02G109800	TraesCS1B02G109300	TraesCS1D02G091500	0.0209561	0.0494029	0.120413	0.120413	NO
513	TraesCS1A02G110000	TraesCS1B02G109400	TraesCS1D02G091600	0.337992	0.0827397	0.253503	0.337992	NO
514	TraesCS1A02G110200	TraesCS1B02G129400	TraesCS1D02G111700	27.1584	26.0061	29.5591	29.5591	YES
515	TraesCS1A02G110300	TraesCS1B02G129300	TraesCS1D02G111900	26.1931	19.1678	19.6775	26.1931	YES
516	TraesCS1A02G110400	TraesCS1B02G129200	TraesCS1D02G112000	3.14994	3.7765	2.90463	3.7765	YES
517	TraesCS1A02G110600	TraesCS1B02G129100	TraesCS1D02G112100	0	0	0	0	NO
518	TraesCS1A02G110700	TraesCS2B02G277700	TraesCS2D02G259500	0.976943	3.97477	2.5545	3.97477	YES
519	TraesCS1A02G110800	TraesCS5B02G059400	TraesCS5D02G068500	0.346596	0.0725579	0.0205829	0.346596	NO
520	TraesCS1A02G110900	TraesCS1B02G129000	TraesCS1D02G112300	4.86014	9.78795	10.8774	10.8774	YES
521	TraesCS1A02G111000	TraesCS1B02G128800	TraesCS1D02G112500	1.89151	2.27685	2.0205	2.27685	YES
522	TraesCS1A02G111300	TraesCS1B02G131600	TraesCS1D02G112800	41.1632	25.7828	23.3895	41.1632	YES
523	TraesCS1A02G111400	TraesCS3B02G187300	TraesCS3D02G053300	0	10.9815	0	10.9815	YES
524	TraesCS1A02G111500	TraesCS1B02G131700	TraesCS1D02G112900	1.75245	1.99661	0.744378	1.99661	YES
525	TraesCS1A02G111600	TraesCS1B02G131800	TraesCS1D02G113000	3.44637	3.78904	4.12396	4.12396	YES
526	TraesCS1A02G111700	TraesCS1B02G131900	TraesCS1D02G113100	0	0.0814428	0.0789698	0.0814428	NO
527	TraesCS1A02G111800	TraesCS1B02G132000	TraesCS1D02G113200	5.64169	7.05355	4.96616	7.05355	YES
528	TraesCS1A02G111900	TraesCS1B02G132100	TraesCS1D02G113400	4.22289	4.89715	5.23226	5.23226	YES
529	TraesCS1A02G112000	TraesCS1B02G132300	TraesCS1D02G113600	15.7496	15.9872	10.8329	15.9872	YES
530	TraesCS1A02G112100	TraesCS1B02G132400	TraesCS1D02G113700	13.2953	15.7323	12.2309	15.7323	YES
531	TraesCS1A02G112200	TraesCS1B02G132500	TraesCS1D02G113900	8.13771	1.53399	6.96576	8.13771	YES
532	TraesCS1A02G112400	TraesCS1B02G132600	TraesCS1D02G114000	29.3655	11.3763	18.8068	29.3655	YES
533	TraesCS1A02G112500	TraesCS1B02G132700	TraesCS1D02G114100	489.308	458.954	427.736	489.308	YES
534	TraesCS1A02G112600	TraesCS1B02G132800	TraesCS1D02G114200	17.9745	18.1243	17.7499	18.1243	YES
535	TraesCS1A02G112700	TraesCS1B02G132900	TraesCS1D02G114300	0.522061	2.57142	0.748092	2.57142	YES
536	TraesCS1A02G112800	TraesCS1B02G133100	TraesCS1D02G114400	13.3274	19.6862	19.456	19.6862	YES
537	TraesCS1A02G113100	TraesCS1B02G133200	TraesCS1D02G114500	7.83802	4.24606	6.94455	7.83802	YES
538	TraesCS1A02G113200	TraesCS1B02G133300	TraesCS1D02G114600	0.056132	3.74752	0.0912555	3.74752	YES
539	TraesCS1A02G113300	TraesCS1B02G133400	TraesCS1D02G114700	1.34266	1.64588	0.890471	1.64588	YES
540	TraesCS1A02G113400	TraesCS1B02G133500	TraesCS1D02G114800	0.12904	0	0.0155364	0.12904	NO
541	TraesCS1A02G113700	TraesCS1B02G134000	TraesCS1D02G115300	7.1	6.53689	8.41079	8.41079	YES
542	TraesCS1A02G113800	TraesCS1B02G134100	TraesCS1D02G115400	0.273686	0.124573	0.0936698	0.273686	NO
543	TraesCS1A02G113900	TraesCS1B02G134200	TraesCS1D02G115500	0.951362	1.59252	4.40907	4.40907	YES
544	TraesCS1A02G114000	TraesCS1B02G134300	TraesCS1D02G115700	4.31085	3.54802	5.75337	5.75337	YES
545	TraesCS1A02G114100	TraesCS1B02G134400	TraesCS1D02G115800	12.9667	8.39143	15.4078	15.4078	YES
546	TraesCS1A02G114700	TraesCS1B02G134600	TraesCS1D02G116000	2.73364	5.77079	2.79228	5.77079	YES
547	TraesCS1A02G114800	TraesCS1B02G134700	TraesCS1D02G116100	2.56296	0.685039	1.18924	2.56296	YES
548	TraesCS1A02G114900	TraesCS1B02G134800	TraesCS1D02G116300	0.0512966	0.0169655	0.0639966	0.0639966	NO
549	TraesCS1A02G115000	TraesCS1B02G134900	TraesCS1D02G116400	3.97196	4.55951	5.37626	5.37626	YES
550	TraesCS1A02G115100	TraesCS1B02G135000	TraesCS1D02G116500	9.8895	8.79436	9.0123	9.8895	YES
551	TraesCS1A02G115200	TraesCS1B02G135100	TraesCS1D02G116600	1.34782	2.22272	1.36419	2.22272	YES
552	TraesCS1A02G115300	TraesCS1B02G135200	TraesCS1D02G116700	0.0707094	0.201419	0.230628	0.230628	NO
553	TraesCS1A02G115400	TraesCS1B02G135300	TraesCS1D02G116800	25.1646	13.6672	20.9918	25.1646	YES
554	TraesCS1A02G115500	TraesCS1B02G135400	TraesCS1D02G116900	1.26351	1.1211	0.757608	1.26351	YES
555	TraesCS1A02G115600	TraesCS1B02G135500	TraesCS1D02G117000	0.367464	0.142757	0.736084	0.736084	YES
556	TraesCS1A02G115900	TraesCS1B02G135800	TraesCS4D02G137000	2.2168	0.914366	1.31731	2.2168	YES
557	TraesCS1A02G116100	TraesCS1B02G136100	TraesCS1D02G117300	0	0	0.146867	0.146867	NO
558	TraesCS1A02G116200	TraesCS1B02G136200	TraesCS1D02G117400	6.85973	19.1678	16.6037	19.1678	YES
559	TraesCS1A02G116400	TraesCS1B02G136400	TraesCS1D02G117500	0.368443	0.368443	0.493398	0.493398	NO
560	TraesCS1A02G116500	TraesCS1B02G136500	TraesCS1D02G117800	6.10635	7.58969	7.11975	7.58969	YES
561	TraesCS1A02G116700	TraesCS1B02G136700	TraesCS1D02G117900	49.8306	93.088	78.5901	93.088	YES
562	TraesCS1A02G116900	TraesCS1B02G136800	TraesCS1D02G118000	97.0246	44.5902	34.7767	97.0246	YES
563	TraesCS1A02G117000	TraesCS1B02G136900	TraesCS1D02G118100	50.1185	45.2054	94.1233	94.1233	YES
564	TraesCS1A02G117100	TraesCS1B02G137000	TraesCS1D02G118200	75.4252	0.546539	0	75.4252	YES
565	TraesCS1A02G117300	TraesCS1B02G137100	TraesCS1D02G118300	1.8021	4.94065	7.11756	7.11756	YES
566	TraesCS1A02G117400	TraesCS1B02G137200	TraesCS1D02G118500	37.5836	92.9885	151.23	151.23	YES
567	TraesCS1A02G117500	TraesCS1B02G137300	TraesCS1D02G118600	17.4031	8.05423	8.9757	17.4031	YES
568	TraesCS1A02G117600	TraesCS1B02G137400	TraesCS1D02G118700	2.03213	0.948227	0.801575	2.03213	YES
569	TraesCS1A02G117800	TraesCS1B02G137500	TraesCS1D02G118900	0	0	0	0	NO
570	TraesCS1A02G117900	TraesCS1B02G137600	TraesCS1D02G119000	0.0705904	0.0126519	0.0315838	0.0705904	NO
571	TraesCS1A02G118100	TraesCS1B02G137700	TraesCS1D02G119100	2.78493	2.00648	3.81576	3.81576	YES
572	TraesCS1A02G118200	TraesCS1B02G137900	TraesCS1D02G119300	1.82069	6.56052	1.66107	6.56052	YES
573	TraesCS1A02G118300	TraesCS1B02G138000	TraesCS1D02G119400	4.31698	6.51324	6.73977	6.73977	YES
574	TraesCS1A02G118400	TraesCS1B02G138100	TraesCS1D02G119500	14.5239	14.6838	13.2601	14.6838	YES
575	TraesCS1A02G118700	TraesCS1B02G138200	TraesCS1D02G119600	9.32222	9.1181	6.29394	9.32222	YES
576	TraesCS1A02G118800	TraesCS1B02G138300	TraesCS1D02G119700	4.81822	4.76471	9.08196	9.08196	YES
577	TraesCS1A02G118900	TraesCS1B02G138400	TraesCS1D02G119800	4.04463	6.99178	7.35409	7.35409	YES
578	TraesCS1A02G119000	TraesCS1B02G138500	TraesCS1D02G119900	0	0.321123	0.522021	0.522021	YES
579	TraesCS1A02G119100	TraesCS1B02G138600	TraesCS1D02G120000	0.716625	2.29146	1.63508	2.29146	YES
580	TraesCS1A02G119300	TraesCS1B02G138700	TraesCS1D02G120100	1.20931	0.804512	1.28444	1.28444	YES
581	TraesCS1A02G119400	TraesCS1B02G138800	TraesCS1D02G120200	0.112147	0.389575	0	0.389575	NO
582	TraesCS1A02G119500	TraesCS1B02G138900	TraesCS1D02G120300	3.14648	0.183826	7.51564	7.51564	YES
583	TraesCS1A02G119700	TraesCS1B02G139100	TraesCS1D02G120600	6.82658	8.00443	9.47951	9.47951	YES
584	TraesCS1A02G119800	TraesCS1B02G139200	TraesCS1D02G120700	5.03773	10.0395	6.18469	10.0395	YES
585	TraesCS1A02G119900	TraesCS1B02G139400	TraesCS1D02G120800	0.0759321	0.0599647	0.0869713	0.0869713	NO
586	TraesCS1A02G120100	TraesCS1B02G139500	TraesCS1D02G121000	28.8185	25.7697	26.2723	28.8185	YES
587	TraesCS1A02G120200	TraesCS1B02G139600	TraesCS1D02G121200	41.7342	50.3572	50.987	50.987	YES
588	TraesCS1A02G120300	TraesCS1B02G139700	TraesCS1D02G121300	2.42048	0.864648	5.19325	5.19325	YES
589	TraesCS1A02G120400	TraesCS1B02G139800	TraesCS1D02G121400	5.82563	1.16341	7.14513	7.14513	YES
590	TraesCS1A02G120500	TraesCS1B02G139900	TraesCS1D02G121500	34.2527	16.2941	19.4714	34.2527	YES
591	TraesCS1A02G120800	TraesCS1B02G140100	TraesCS1D02G121600	3.5505	3.01875	6.00355	6.00355	YES
592	TraesCS1A02G120900	TraesCS1B02G140200	TraesCS1D02G121700	6.82093	12.0994	12.8612	12.8612	YES
593	TraesCS1A02G121000	TraesCS1B02G140400	TraesCS1D02G121900	35.0104	59.1697	36.6246	59.1697	YES
594	TraesCS1A02G121300	TraesCS1B02G140700	TraesCS1D02G122100	60.7279	42.3766	54.6366	60.7279	YES
595	TraesCS1A02G121700	TraesCS1B02G140900	TraesCS1D02G122500	4.45597	6.43812	7.18604	7.18604	YES
596	TraesCS1A02G121800	TraesCS1B02G141000	TraesCS1D02G122600	7.23718	13.0789	24.5468	24.5468	YES
597	TraesCS1A02G122000	TraesCS1B02G141200	TraesCS1D02G122800	6.62007	9.5737	6.93477	9.5737	YES
598	TraesCS1A02G122100	TraesCS1B02G141300	TraesCS1D02G123100	1.96522	5.29685	4.11365	5.29685	YES
599	TraesCS1A02G122200	TraesCS1B02G141400	TraesCS1D02G123200	3.86482	1.48484	2.70939	3.86482	YES
600	TraesCS1A02G122300	TraesCS1B02G141500	TraesCS1D02G123300	2.80918	0.54443	3.29959	3.29959	YES
601	TraesCS1A02G122500	TraesCS1B02G141700	TraesCS1D02G123400	18.2077	25.3853	14.1454	25.3853	YES
602	TraesCS1A02G122700	TraesCS1B02G141900	TraesCS1D02G123600	82.0849	114.234	102.504	114.234	YES
603	TraesCS1A02G122800	TraesCS1B02G142000	TraesCS1D02G123700	0.132587	3.81246	1.89156	3.81246	YES
604	TraesCS1A02G122900	TraesCS1B02G142100	TraesCS1D02G123800	9.55137	5.55341	7.30103	9.55137	YES
605	TraesCS1A02G123000	TraesCS1B02G142200	TraesCS1D02G123900	31.8184	27.3023	24.5014	31.8184	YES
606	TraesCS1A02G123100	TraesCS1B02G143600	TraesCS1D02G124000	53.4016	24.629	58.2014	58.2014	YES
607	TraesCS1A02G123200	TraesCS1B02G143500	TraesCS1D02G130900	1.57448	6.93028	3.45354	6.93028	YES
608	TraesCS1A02G123600	TraesCS1B02G143400	TraesCS1D02G130800	6.11836	4.73856	5.69247	6.11836	YES
609	TraesCS1A02G123700	TraesCS1B02G143300	TraesCS1D02G130700	1.32781	0	0.0531151	1.32781	YES
610	TraesCS1A02G123900	TraesCS1B02G143100	TraesCS1D02G130400	4.67465	3.04376	3.79229	4.67465	YES
611	TraesCS1A02G124100	TraesCS1B02G143000	TraesCS1D02G130300	1.23602	1.4128	1.95133	1.95133	YES
612	TraesCS1A02G124200	TraesCS1B02G142800	TraesCS1D02G130200	6.32285	10.2815	3.5538	10.2815	YES
613	TraesCS1A02G124300	TraesCS1B02G142700	TraesCS1D02G129600	1.53235	0.397966	0.770117	1.53235	YES
614	TraesCS1A02G124400	TraesCS1B02G142600	TraesCS1D02G129500	4.83781	6.21984	7.53222	7.53222	YES
615	TraesCS1A02G124500	TraesCS1B02G142500	TraesCS1D02G129400	0.395657	0.958987	0.994518	0.994518	YES
616	TraesCS1A02G124600	TraesCS1B02G142400	TraesCS1D02G129200	153.378	176.861	134.347	176.861	YES
617	TraesCS1A02G124700	TraesCS1B02G143700	TraesCS1D02G129100	4.88568	4.99779	4.92421	4.99779	YES
618	TraesCS1A02G125000	TraesCS1B02G142300	TraesCS1D02G129000	14.0075	15.756	13.5512	15.756	YES
619	TraesCS1A02G125100	TraesCS1B02G144300	TraesCS1D02G128800	216.361	186.537	192.693	216.361	YES
620	TraesCS1A02G125200	TraesCS1B02G144200	TraesCS1D02G128700	0.0276446	0.220156	0.0915171	0.220156	NO
621	TraesCS1A02G125300	TraesCS1B02G144000	TraesCS1D02G128500	5.7222	3.76066	3.08883	5.7222	YES
622	TraesCS1A02G125400	TraesCS1B02G143800	TraesCS1D02G128400	1.89525	52.2354	1.22675	52.2354	YES
623	TraesCS1A02G125500	TraesCS1B02G144500	TraesCS1D02G128000	4.11874	3.72003	5.63236	5.63236	YES
624	TraesCS1A02G125600	TraesCS1B02G144600	TraesCS1D02G127900	4.63459	2.94729	4.37905	4.63459	YES
625	TraesCS1A02G125700	TraesCS1B02G144700	TraesCS1D02G127800	11.1808	4.72316	4.46597	11.1808	YES
626	TraesCS1A02G125800	TraesCS1B02G144800	TraesCS1D02G127700	36.4641	43.3531	47.3505	47.3505	YES
627	TraesCS1A02G125900	TraesCS1B02G145000	TraesCS1D02G127600	0.271889	0.585768	0.275297	0.585768	YES
628	TraesCS1A02G126000	TraesCS1B02G145200	TraesCS1D02G127500	5.99149	12.5535	7.42657	12.5535	YES
629	TraesCS1A02G126100	TraesCS1B02G145300	TraesCS1D02G127400	1.05207	1.05326	1.04589	1.05326	YES
630	TraesCS1A02G126200	TraesCS1B02G145400	TraesCS1D02G127300	0.115162	0.864145	0.281582	0.864145	YES
631	TraesCS1A02G126300	TraesCS1B02G145500	TraesCS1D02G127200	8.75434	9.42151	9.2233	9.42151	YES
632	TraesCS1A02G126400	TraesCS1B02G145600	TraesCS1D02G127000	0.862573	0.724022	0.396924	0.862573	YES
633	TraesCS1A02G126800	TraesCS1B02G145800	TraesCS1D02G126900	10.2542	10.3765	10.8611	10.8611	YES
634	TraesCS1A02G126900	TraesCS1B02G147700	TraesCS1D02G126600	8.0178	6.18088	7.27777	8.0178	YES
635	TraesCS1A02G127000	TraesCS1B02G147600	TraesCS1D02G126700	36.546	29.399	30.0057	36.546	YES
636	TraesCS1A02G127200	TraesCS6B02G329700	TraesCS1D02G170600	0	0.179028	0	0.179028	NO
637	TraesCS1A02G127400	TraesCS1B02G147500	TraesCS1D02G126800	3.53257	1.34748	6.85888	6.85888	YES
638	TraesCS1A02G127500	TraesCS1B02G147400	TraesCS1D02G126500	0.264618	0.0434824	0.252032	0.264618	NO
639	TraesCS1A02G127900	TraesCS1B02G147000	TraesCS1D02G126300	16.3247	16.1262	24.9439	24.9439	YES
640	TraesCS1A02G128300	TraesCS1B02G146700	TraesCS1D02G124900	5.41937	4.41171	5.72059	5.72059	YES
641	TraesCS1A02G128800	TraesCS1B02G146800	TraesCS1D02G125000	0	0	0	0	NO
642	TraesCS1A02G128900	TraesCS1B02G146500	TraesCS1D02G125100	2.90279	1.94181	4.49757	4.49757	YES
643	TraesCS1A02G129000	TraesCS1B02G147900	TraesCS1D02G125700	0	0	0	0	NO
644	TraesCS1A02G129100	TraesCS1B02G146100	TraesCS1D02G125600	103.672	96.7074	89.7383	103.672	YES
645	TraesCS1A02G129200	TraesCS1B02G146000	TraesCS1D02G125500	18.0789	13.6238	13.9808	18.0789	YES
646	TraesCS1A02G129300	TraesCS1B02G147800	TraesCS1D02G125400	7.90339	2.02203	7.4262	7.90339	YES
647	TraesCS1A02G129400	TraesCS1B02G146200	TraesCS1D02G125300	67.6411	56.4071	57.9773	67.6411	YES
648	TraesCS1A02G129500	TraesCS1B02G146400	TraesCS1D02G125200	13.4271	15.8293	28.7813	28.7813	YES
649	TraesCS1A02G129600	TraesCS1B02G147200	TraesCS1D02G125900	1.34474	0.188166	2.16932	2.16932	YES
650	TraesCS1A02G129700	TraesCS1B02G156100	TraesCS1D02G138500	0.415051	0.848516	0.197993	0.848516	YES
651	TraesCS1A02G129800	TraesCS1B02G156000	TraesCS1D02G138400	6.20644	5.22332	7.77643	7.77643	YES
652	TraesCS1A02G130700	TraesCS1B02G156600	TraesCS1D02G139000	7.32606	6.63292	6.36229	7.32606	YES
653	TraesCS1A02G130800	TraesCS1B02G156800	TraesCS1D02G139100	18.7771	21.5135	20.5223	21.5135	YES
654	TraesCS1A02G130900	TraesCS1B02G153800	TraesCS1D02G136500	2.78091	1.7831	3.50995	3.50995	YES
655	TraesCS1A02G131000	TraesCS1B02G153400	TraesCS1D02G132200	8.26995	6.30773	7.02289	8.26995	YES
656	TraesCS1A02G131200	TraesCS1B02G154800	TraesCS1D02G137000	16.556	15.649	15.177	16.556	YES
657	TraesCS1A02G131500	TraesCS1B02G152100	TraesCS1D02G136900	38.9866	44.3654	29.1838	44.3654	YES
658	TraesCS1A02G131600	TraesCS1B02G154400	TraesCS1D02G136400	3.28958	5.47352	5.19529	5.47352	YES
659	TraesCS1A02G132400	TraesCS1B02G154500	TraesCS7D02G246600	490.526	379.188	407.008	490.526	YES
660	TraesCS1A02G132600	TraesCS1B02G154200	TraesCS1D02G135500	11.4012	8.00827	12.1888	12.1888	YES
661	TraesCS1A02G132800	TraesCS1B02G153500	TraesCS1D02G135700	0.0464588	0	0.312823	0.312823	NO
662	TraesCS1A02G133000	TraesCS1B02G151200	TraesCS1D02G131900	0.0190395	0.882228	0.389896	0.882228	YES
663	TraesCS1A02G133100	TraesCS1B02G151300	TraesCS1D02G131800	30.0607	13.1162	33.8066	33.8066	YES
664	TraesCS1A02G133200	TraesCS1B02G152700	TraesCS1D02G124200	0.076971	0.0669478	2.20272	2.20272	YES
665	TraesCS1A02G133400	TraesCS1B02G150000	TraesCS1D02G124300	14.4892	12.4782	16.4311	16.4311	YES
666	TraesCS1A02G133500	TraesCS1B02G150100	TraesCS1D02G124400	3.31815	3.17898	2.57814	3.31815	YES
667	TraesCS1A02G133700	TraesCS1B02G148400	TraesCS1D02G124600	26.1065	28.3422	44.6243	44.6243	YES
668	TraesCS1A02G133800	TraesCS1B02G146900	TraesCS1D02G124700	3.79131	4.80681	4.0879	4.80681	YES
669	TraesCS1A02G133900	TraesCS1B02G147300	TraesCS1D02G126000	5.59689	9.09699	5.63021	9.09699	YES
670	TraesCS1A02G134000	TraesCS1B02G148000	TraesCS1D02G125800	7.7476	7.03425	20.5144	20.5144	YES
671	TraesCS1A02G134500	TraesCS1B02G152500	TraesCS1D02G124100	5.78633	6.0958	5.41412	6.0958	YES
672	TraesCS1A02G134600	TraesCS1B02G148200	TraesCS1D02G131100	9.50586	8.74676	9.267	9.50586	YES
673	TraesCS1A02G134800	TraesCS1B02G149000	TraesCS1D02G131700	8.46694	5.55337	5.59752	8.46694	YES
674	TraesCS1A02G135100	TraesCS1B02G149700	TraesCS1D02G131600	4.17863	5.25334	6.44949	6.44949	YES
675	TraesCS1A02G135300	TraesCS1B02G150500	TraesCS1D02G131500	9.44514	9.99159	9.35126	9.99159	YES
676	TraesCS1A02G135600	TraesCS1B02G150800	TraesCS1D02G131300	1.73756	3.98034	4.50297	4.50297	YES
677	TraesCS1A02G135700	TraesCS1B02G150400	TraesCS1D02G131200	5.85547	10.3687	6.75432	10.3687	YES
678	TraesCS1A02G135800	TraesCS1B02G156400	TraesCS1D02G138800	8.75106	17.8563	12.9812	17.8563	YES
679	TraesCS1A02G135900	TraesCS1B02G156300	TraesCS1D02G138700	2.24673	2.0343	0.19545	2.24673	YES
680	TraesCS1A02G136000	TraesCS1B02G156200	TraesCS1D02G138600	9.28907	16.7982	12.1889	16.7982	YES
681	TraesCS1A02G136100	TraesCS1B02G155100	TraesCS1D02G134600	9.28294	6.6758	7.52311	9.28294	YES
682	TraesCS1A02G136200	TraesCS1B02G154100	TraesCS1D02G136800	7.20477	12.6506	20.1146	20.1146	YES
683	TraesCS1A02G136400	TraesCS1B02G152800	TraesCS1D02G134000	8.70424	8.37933	11.4031	11.4031	YES
684	TraesCS1A02G136600	TraesCS1B02G155000	TraesCS1D02G134700	5.12511	3.92363	4.65826	5.12511	YES
685	TraesCS1A02G136800	TraesCS1B02G153700	TraesCS1D02G134800	4.53517	0.086975	0.198498	4.53517	YES
686	TraesCS1A02G136900	TraesCS1B02G155300	TraesCS1D02G137800	6.0887	3.37441	3.72027	6.0887	YES
687	TraesCS1A02G137000	TraesCS1B02G155600	TraesCS1D02G138000	18.3284	14.196	5.14502	18.3284	YES
688	TraesCS1A02G137200	TraesCS1B02G155700	TraesCS1D02G138100	3.67197	6.04387	4.19475	6.04387	YES
689	TraesCS1A02G137300	TraesCS1B02G155800	TraesCS1D02G138200	0.474731	0.414678	1.01031	1.01031	YES
690	TraesCS1A02G137400	TraesCS1B02G152000	TraesCS1D02G133300	5.50422	8.62666	7.02235	8.62666	YES
691	TraesCS1A02G137700	TraesCS1B02G148900	TraesCS1D02G133700	22.2612	22.3031	23.9319	23.9319	YES
692	TraesCS1A02G137800	TraesCS1B02G149400	TraesCS1D02G132600	11.8443	16.5262	19.4963	19.4963	YES
693	TraesCS1A02G137900	TraesCS1B02G153300	TraesCS1D02G134400	16.0477	15.5396	16.084	16.084	YES
694	TraesCS1A02G138100	TraesCS1B02G149900	TraesCS1D02G134500	3.42389	0.437851	0	3.42389	YES
695	TraesCS1A02G138300	TraesCS1B02G151800	TraesCS1D02G134100	4.01298	8.76443	4.15232	8.76443	YES
696	TraesCS1A02G138400	TraesCS1B02G152200	TraesCS1D02G135200	7.68503	10.0663	8.70314	10.0663	YES
697	TraesCS1A02G138500	TraesCS1B02G152300	TraesCS1D02G135300	11.0773	11.9728	9.75736	11.9728	YES
698	TraesCS1A02G138600	TraesCS1B02G153600	TraesCS1D02G135400	30.1234	33.1587	30.9379	33.1587	YES
699	TraesCS1A02G138800	TraesCS1B02G148500	TraesCS1D02G132700	99.9795	113.085	124.562	124.562	YES
700	TraesCS1A02G139200	TraesCS1B02G149600	TraesCS1D02G132800	7.3694	5.05913	6.12985	7.3694	YES
701	TraesCS1A02G139300	TraesCS1B02G149500	TraesCS1D02G132900	26.0085	25.4669	23.1161	26.0085	YES
702	TraesCS1A02G139400	TraesCS1B02G149800	TraesCS1D02G133800	8.66703	9.71568	9.46358	9.71568	YES
703	TraesCS1A02G139700	TraesCS1B02G156900	TraesCS1D02G139300	7.41654	5.9641	7.2305	7.41654	YES
704	TraesCS1A02G139900	TraesCS1B02G157000	TraesCS1D02G139400	7.788	7.80531	11.3106	11.3106	YES
705	TraesCS1A02G140700	TraesCS1B02G157100	TraesCS1D02G139500	2.47812	7.14953	3.19755	7.14953	YES
706	TraesCS1A02G140900	TraesCS1B02G157400	TraesCS1D02G139800	4.30664	2.27442	3.88726	4.30664	YES
707	TraesCS1A02G141100	TraesCS1B02G157500	TraesCS1D02G140100	0.865442	0.334958	0.791702	0.865442	YES
708	TraesCS1A02G141200	TraesCS1B02G157600	TraesCS1D02G140200	0.664404	0.683817	1.03346	1.03346	YES
709	TraesCS1A02G141300	TraesCS1B02G157700	TraesCS1D02G140300	0.23558	0.330292	0.415091	0.415091	NO
710	TraesCS1A02G141400	TraesCS1B02G157900	TraesCS1D02G140400	3.29664	0.996574	0.496898	3.29664	YES
711	TraesCS1A02G141500	TraesCS1B02G158000	TraesCS1D02G140500	0.274899	0.783288	0.130534	0.783288	YES
712	TraesCS1A02G141600	TraesCS1B02G158200	TraesCS1D02G140700	3.03937	0.779976	1.38162	3.03937	YES
713	TraesCS1A02G141700	TraesCS1B02G158300	TraesCS1D02G140800	7.65014	2.45488	5.86928	7.65014	YES
714	TraesCS1A02G141800	TraesCS1B02G158400	TraesCS1D02G140900	0.185274	0.185274	0	0.185274	NO
715	TraesCS1A02G141900	TraesCS1B02G159800	TraesCS1D02G141000	1.40095	4.02107	2.20501	4.02107	YES
716	TraesCS1A02G142000	TraesCS1B02G159700	TraesCS1D02G141100	7.40552	4.13379	5.33004	7.40552	YES
717	TraesCS1A02G142200	TraesCS1B02G159600	TraesCS1D02G141200	3.51088	4.06832	3.30575	4.06832	YES
718	TraesCS1A02G142300	TraesCS1B02G159500	TraesCS1D02G141300	3.05209	3.80316	3.80412	3.80412	YES
719	TraesCS1A02G142400	TraesCS1B02G159400	TraesCS1D02G141400	2.24019	0.647108	0.865851	2.24019	YES
720	TraesCS1A02G142500	TraesCS1B02G159200	TraesCS1D02G141500	13.6251	8.41754	18.2332	18.2332	YES
721	TraesCS1A02G142600	TraesCS1B02G159100	TraesCS1D02G141600	22.5112	36.9931	20.7945	36.9931	YES
722	TraesCS1A02G142900	TraesCS1B02G158900	TraesCS1D02G141700	12.718	11.4926	13.2273	13.2273	YES
723	TraesCS1A02G143000	TraesCS1B02G158600	TraesCS1D02G141800	14.889	14.5289	27.882	27.882	YES
724	TraesCS1A02G143100	TraesCS1B02G158500	TraesCS1D02G142000	3.53243	6.43631	3.49402	6.43631	YES
725	TraesCS1A02G143300	TraesCS1B02G159900	TraesCS1D02G142100	2.97962	1.81715	1.75755	2.97962	YES
726	TraesCS1A02G143400	TraesCS1B02G160800	TraesCS1D02G142200	2.42425	2.78771	2.37958	2.78771	YES
727	TraesCS1A02G143500	TraesCS1B02G160900	TraesCS1D02G142300	40.3514	19.6854	27.5529	40.3514	YES
728	TraesCS1A02G143600	TraesCS1B02G161000	TraesCS1D02G142400	2.82358	2.03367	5.45273	5.45273	YES
729	TraesCS1A02G143700	TraesCS1B02G161100	TraesCS1D02G142500	32.3176	16.5866	33.829	33.829	YES
730	TraesCS1A02G143800	TraesCS1B02G161200	TraesCS1D02G142600	11.2188	12.9243	16.2813	16.2813	YES
731	TraesCS1A02G143900	TraesCS1B02G161300	TraesCS1D02G142700	24.9957	25.3846	26.6595	26.6595	YES
732	TraesCS1A02G144000	TraesCS1B02G161400	TraesCS1D02G143000	3.35845	4.07366	1.99775	4.07366	YES
733	TraesCS1A02G144100	TraesCS1B02G161500	TraesCS1D02G143200	0	0.0203255	0.0369975	0.0369975	NO
734	TraesCS1A02G144400	TraesCS1B02G161800	TraesCS1D02G143500	1.61825	1.13109	1.46371	1.61825	YES
735	TraesCS1A02G144600	TraesCS1B02G161900	TraesCS1D02G143700	0.0214901	0.0313726	0.00895685	0.0313726	NO
736	TraesCS1A02G144700	TraesCS1B02G162000	TraesCS1D02G143800	8.28223	6.21177	4.23007	8.28223	YES
737	TraesCS1A02G144800	TraesCS1B02G162100	TraesCS1D02G143900	2.42866	2.12088	2.17311	2.42866	YES
738	TraesCS1A02G145000	TraesCS1B02G162300	TraesCS1D02G144000	47.6393	68.1394	31.5054	68.1394	YES
739	TraesCS1A02G145100	TraesCS1B02G162400	TraesCS1D02G144100	0.125215	0.0578222	0.0461225	0.125215	NO
740	TraesCS1A02G145300	TraesCS1B02G162500	TraesCS1D02G144200	0.332584	0.149748	0.204896	0.332584	NO
741	TraesCS1A02G145700	TraesCS1B02G162600	TraesCS1D02G144300	0.207674	0.167195	0.0855301	0.207674	NO
742	TraesCS1A02G145800	TraesCS1B02G164000	TraesCS1D02G144400	9.61998	11.0923	7.6571	11.0923	YES
743	TraesCS1A02G145900	TraesCS1B02G164100	TraesCS1D02G144500	6.91663	3.49021	5.08822	6.91663	YES
744	TraesCS1A02G146000	TraesCS1B02G164200	TraesCS1D02G144600	0.112698	0.120494	0.112788	0.120494	NO
745	TraesCS1A02G146200	TraesCS1B02G164300	TraesCS1D02G144700	10.5434	10.861	8.74271	10.861	YES
746	TraesCS1A02G146600	TraesCS1B02G164900	TraesCS1D02G144800	7.236	8.79507	8.80958	8.80958	YES
747	TraesCS1A02G146800	TraesCS2B02G478600	TraesCS7D02G478400	3.75633	0	0	3.75633	YES
748	TraesCS1A02G146900	TraesCS1B02G164700	TraesCS1D02G145000	1.78843	1.50961	2.01689	2.01689	YES
749	TraesCS1A02G147000	TraesCS1B02G164500	TraesCS1D02G145100	297.789	293.883	254.345	297.789	YES
750	TraesCS1A02G147200	TraesCS1B02G165300	TraesCS1D02G145300	0.23434	0.144505	0.153417	0.23434	NO
751	TraesCS1A02G147400	TraesCS1B02G165500	TraesCS1D02G145400	7.0406	6.91854	1.94673	7.0406	YES
752	TraesCS1A02G147500	TraesCS1B02G165600	TraesCS1D02G145500	8.51592	9.27951	12.8073	12.8073	YES
753	TraesCS1A02G147600	TraesCS1B02G165700	TraesCS1D02G145600	1.7272	1.08363	1.8242	1.8242	YES
754	TraesCS1A02G147700	TraesCS1B02G165800	TraesCS1D02G145700	9.3814	11.3425	6.29121	11.3425	YES
755	TraesCS1A02G148000	TraesCS1B02G165900	TraesCS1D02G145900	33.9525	34.9533	37.5293	37.5293	YES
756	TraesCS1A02G148300	TraesCS1B02G166000	TraesCS1D02G146000	0.383425	0.395648	0.247963	0.395648	NO
757	TraesCS1A02G148400	TraesCS1B02G166100	TraesCS1D02G146100	203.715	126.42	144.452	203.715	YES
758	TraesCS1A02G148800	TraesCS3B02G186400	TraesCS2D02G068200	0	0.983094	0	0.983094	YES
759	TraesCS1A02G149100	TraesCS1B02G167000	TraesCS1D02G146400	6.74283	3.32391	5.1609	6.74283	YES
760	TraesCS1A02G149200	TraesCS1B02G167100	TraesCS1D02G146500	50.0983	49.4836	36.9399	50.0983	YES
761	TraesCS1A02G149300	TraesCS1B02G167200	TraesCS1D02G146600	0.0893895	0.143235	0.18913	0.18913	NO
762	TraesCS1A02G149400	TraesCS1B02G167400	TraesCS1D02G146700	0	0.00951776	0.025735	0.025735	NO
763	TraesCS1A02G149500	TraesCS1B02G167500	TraesCS1D02G146800	0.023061	0	0	0.023061	NO
764	TraesCS1A02G149700	TraesCS1B02G167700	TraesCS1D02G146900	2.93198	2.2022	2.55688	2.93198	YES
765	TraesCS1A02G149800	TraesCS1B02G167800	TraesCS1D02G147000	1.39548	0.679526	0.966511	1.39548	YES
766	TraesCS1A02G150200	TraesCS1B02G168000	TraesCS1D02G147200	4.8894	0.715868	0.718171	4.8894	YES
767	TraesCS1A02G150400	TraesCS1B02G168100	TraesCS1D02G147400	0.317412	0.381434	0.343071	0.381434	NO
768	TraesCS1A02G150600	TraesCS1B02G168200	TraesCS1D02G147600	29.067	37.4255	34.1101	37.4255	YES
769	TraesCS1A02G150700	TraesCS1B02G168300	TraesCS1D02G147700	0.0139581	0.0256089	0.0526153	0.0526153	NO
770	TraesCS1A02G150800	TraesCS1B02G168400	TraesCS1D02G147800	0.172582	0.141153	0.466162	0.466162	NO
771	TraesCS1A02G150900	TraesCS1B02G168500	TraesCS1D02G147900	91.5407	15.8222	100.6	100.6	YES
772	TraesCS1A02G151000	TraesCS1B02G168600	TraesCS1D02G148000	8.54924	54.5283	27.2184	54.5283	YES
773	TraesCS1A02G151100	TraesCS1B02G168700	TraesCS1D02G148100	2.87454	2.91763	3.22145	3.22145	YES
774	TraesCS1A02G151200	TraesCS1B02G168800	TraesCS1D02G148200	3.88898	4.58511	4.31733	4.58511	YES
775	TraesCS1A02G151400	TraesCS1B02G168900	TraesCS1D02G148400	13.4674	6.12438	8.49448	13.4674	YES
776	TraesCS1A02G151500	TraesCS1B02G169100	TraesCS1D02G148500	3.16277	1.45494	3.75419	3.75419	YES
777	TraesCS1A02G151600	TraesCS1B02G169200	TraesCS1D02G148600	0.116978	0.325547	0.141595	0.325547	NO
778	TraesCS1A02G151700	TraesCS1B02G169300	TraesCS1D02G148700	3.32514	18.2625	11.7401	18.2625	YES
779	TraesCS1A02G152000	TraesCS1B02G169400	TraesCS1D02G148800	4.26744	8.07064	4.84046	8.07064	YES
780	TraesCS1A02G152100	TraesCS1B02G169500	TraesCS1D02G148900	4.87493	3.83792	4.92189	4.92189	YES
781	TraesCS1A02G152200	TraesCS1B02G169600	TraesCS1D02G149100	5.80042	6.06319	5.2932	6.06319	YES
782	TraesCS1A02G152300	TraesCS1B02G169700	TraesCS1D02G149200	0.29073	0.212292	0.187118	0.29073	NO
783	TraesCS1A02G152400	TraesCS1B02G170000	TraesCS1D02G149500	0.188052	0.138683	0.0656373	0.188052	NO
784	TraesCS1A02G152500	TraesCS1B02G169900	TraesCS1D02G149400	10.6859	16.1379	12.2346	16.1379	YES
785	TraesCS1A02G152600	TraesCS1B02G170100	TraesCS1D02G149700	0	0.0620685	0.16013	0.16013	NO
786	TraesCS1A02G152800	TraesCS1B02G170200	TraesCS1D02G149800	0.258886	0.224989	0.378736	0.378736	NO
787	TraesCS1A02G152900	TraesCS1B02G170300	TraesCS1D02G149900	2.08005	3.16613	2.45268	3.16613	YES
788	TraesCS1A02G153100	TraesCS1B02G171800	TraesCS1D02G151500	3.32962	1.4855	1.46536	3.32962	YES
789	TraesCS1A02G153300	TraesCS1B02G171600	TraesCS1D02G151800	20.8253	17.5976	19.8003	20.8253	YES
790	TraesCS1A02G153400	TraesCS1B02G171500	TraesCS1D02G151900	0.0495206	0.110978	0.0639553	0.110978	NO
791	TraesCS1A02G153600	TraesCS1B02G171400	TraesCS1D02G152000	7.72585	7.66128	6.16012	7.72585	YES
792	TraesCS1A02G153800	TraesCS1B02G171300	TraesCS1D02G152200	44.3096	33.0344	47.4148	47.4148	YES
793	TraesCS1A02G153900	TraesCS1B02G171200	TraesCS1D02G152300	25.8979	22.4469	36.6644	36.6644	YES
794	TraesCS1A02G154300	TraesCS1B02G170900	TraesCS1D02G153100	6.34016	7.08272	5.29996	7.08272	YES
795	TraesCS1A02G154400	TraesCS1B02G170600	TraesCS1D02G153300	24.1327	20.3471	19.1807	24.1327	YES
796	TraesCS1A02G154500	TraesCS1B02G170500	TraesCS1D02G153400	3.30643	8.14688	2.36355	8.14688	YES
797	TraesCS1A02G154600	TraesCS1B02G170400	TraesCS1D02G153500	1.36197	0.7537	1.61938	1.61938	YES
798	TraesCS1A02G154700	TraesCS1B02G171900	TraesCS1D02G153600	5.87801	4.3665	6.17338	6.17338	YES
799	TraesCS1A02G154900	TraesCS1B02G172100	TraesCS1D02G153700	1.67952	1.16485	1.64576	1.67952	YES
800	TraesCS1A02G155200	TraesCS1B02G172400	TraesCS1D02G153900	319.235	336.371	371.53	371.53	YES
801	TraesCS1A02G155300	TraesCS1B02G172500	TraesCS1D02G154000	0.167015	0.778266	0	0.778266	YES
802	TraesCS1A02G155500	TraesCS1B02G172800	TraesCS1D02G154200	4.77942	5.39938	5.22476	5.39938	YES
803	TraesCS1A02G156000	TraesCS1B02G173100	TraesCS1D02G154400	0.907052	0.619498	1.92472	1.92472	YES
804	TraesCS1A02G156100	TraesCS1B02G173200	TraesCS1D02G154700	3.94238	1.83611	11.2079	11.2079	YES
805	TraesCS1A02G156300	TraesCS1B02G173300	TraesCS1D02G154800	7.65229	6.48456	6.17586	7.65229	YES
806	TraesCS1A02G156400	TraesCS1B02G173400	TraesCS1D02G154900	80.0849	68.4504	56.1414	80.0849	YES
807	TraesCS1A02G156500	TraesCS1B02G173600	TraesCS1D02G155000	4.43201	6.17282	7.4234	7.4234	YES
808	TraesCS1A02G156600	TraesCS1B02G173700	TraesCS1D02G155100	18.5631	13.6734	18.8535	18.8535	YES
809	TraesCS1A02G157500	TraesCS1B02G173900	TraesCS1D02G155200	10.0776	10.1556	10.7093	10.7093	YES
810	TraesCS1A02G157700	TraesCS1B02G174000	TraesCS1D02G155300	7.03863	5.87739	7.5749	7.5749	YES
811	TraesCS1A02G157900	TraesCS1B02G174100	TraesCS1D02G155400	10.1526	9.48689	16.5863	16.5863	YES
812	TraesCS1A02G158200	TraesCS1B02G174200	TraesCS1D02G155500	2.22926	1.33448	3.12657	3.12657	YES
813	TraesCS1A02G158300	TraesCS1B02G174300	TraesCS1D02G155600	42.1698	40.96	48.0535	48.0535	YES
814	TraesCS1A02G158400	TraesCS1B02G174400	TraesCS1D02G155700	10.8954	6.90454	9.08615	10.8954	YES
815	TraesCS1A02G158500	TraesCS1B02G174500	TraesCS1D02G155800	18.062	15.7826	11.7987	18.062	YES
816	TraesCS1A02G158600	TraesCS1B02G174600	TraesCS1D02G155900	2.8259	1.67871	2.84399	2.84399	YES
817	TraesCS1A02G158700	TraesCS1B02G174700	TraesCS1D02G156000	26.9991	25.525	30.6186	30.6186	YES
818	TraesCS1A02G158800	TraesCS1B02G175400	TraesCS1D02G156100	5.12656	6.99751	4.22019	6.99751	YES
819	TraesCS1A02G158900	TraesCS1B02G175000	TraesCS1D02G156200	9.09145	9.03571	8.5939	9.09145	YES
820	TraesCS1A02G159000	TraesCS1B02G174900	TraesCS1D02G156300	0	0	0.0242732	0.0242732	NO
821	TraesCS1A02G159100	TraesCS1B02G174800	TraesCS1D02G156400	603.347	439.837	409.024	603.347	YES
822	TraesCS1A02G159200	TraesCS1B02G175600	TraesCS1D02G156600	2.08706	3.0353	2.20461	3.0353	YES
823	TraesCS1A02G159300	TraesCS1B02G175700	TraesCS1D02G156700	179.728	91.888	120.364	179.728	YES
824	TraesCS1A02G159400	TraesCS1B02G175800	TraesCS1D02G156800	3.94708	4.69109	4.69966	4.69966	YES
825	TraesCS1A02G159500	TraesCS1B02G175900	TraesCS1D02G156900	1.9457	1.70048	3.69218	3.69218	YES
826	TraesCS1A02G159600	TraesCS1B02G176000	TraesCS1D02G157000	0.645	1.13344	0.386298	1.13344	YES
827	TraesCS1A02G159700	TraesCS1B02G176700	TraesCS1D02G157100	5.20765	67.053	77.5675	77.5675	YES
828	TraesCS1A02G160100	TraesCS1B02G176500	TraesCS1D02G157300	2.02175	1.47564	1.04068	2.02175	YES
829	TraesCS1A02G160200	TraesCS1B02G176400	TraesCS1D02G157400	3.21982	0.46234	2.09838	3.21982	YES
830	TraesCS1A02G160300	TraesCS1B02G176300	TraesCS1D02G157500	43.2494	49.787	54.078	54.078	YES
831	TraesCS1A02G160400	TraesCS1B02G176200	TraesCS1D02G157513	9.26206	11.6958	9.73869	11.6958	YES
832	TraesCS1A02G160500	TraesCS1B02G176100	TraesCS1D02G157600	4.95168	5.30446	6.59227	6.59227	YES
833	TraesCS1A02G160600	TraesCS1B02G177300	TraesCS1D02G157800	6.98569	7.58025	3.53972	7.58025	YES
834	TraesCS1A02G160700	TraesCS1B02G177400	TraesCS1D02G157900	9.09713	7.78171	7.35752	9.09713	YES
835	TraesCS1A02G160900	TraesCS1B02G177600	TraesCS1D02G158000	37.1435	11.8569	44.9375	44.9375	YES
836	TraesCS1A02G161200	TraesCS1B02G177700	TraesCS1D02G158200	17.1179	9.37361	19.0664	19.0664	YES
837	TraesCS1A02G161300	TraesCS1B02G177800	TraesCS1D02G158300	12.1221	3.64648	14.2965	14.2965	YES
838	TraesCS1A02G161600	TraesCS1B02G178200	TraesCS1D02G158500	0.0611459	0.0563489	0.0790926	0.0790926	NO
839	TraesCS1A02G161900	TraesCS1B02G178500	TraesCS1D02G158700	46.2896	11.4949	40.2009	46.2896	YES
840	TraesCS1A02G162100	TraesCS1B02G178700	TraesCS1D02G158900	0.300226	0.29419	0.210691	0.300226	NO
841	TraesCS1A02G162200	TraesCS1B02G178800	TraesCS1D02G159000	4.86053	2.82943	5.81666	5.81666	YES
842	TraesCS1A02G162300	TraesCS1B02G178900	TraesCS1D02G159100	2.14825	0.46941	3.06812	3.06812	YES
843	TraesCS1A02G162400	TraesCS1B02G179000	TraesCS1D02G159200	14.7214	16.102	18.8975	18.8975	YES
844	TraesCS1A02G162500	TraesCS1B02G179800	TraesCS1D02G159900	0.590049	0.491339	0.526946	0.590049	YES
845	TraesCS1A02G162700	TraesCS1B02G179600	TraesCS1D02G159700	15.5986	46.5741	6.62309	46.5741	YES
846	TraesCS1A02G162800	TraesCS1B02G179500	TraesCS1D02G159600	8.44658	8.11937	9.10638	9.10638	YES
847	TraesCS1A02G163000	TraesCS1B02G179300	TraesCS1D02G159500	0.778711	0.665007	0.924672	0.924672	YES
848	TraesCS1A02G163100	TraesCS1B02G179200	TraesCS1D02G159400	0.158946	14.2244	13.9982	14.2244	YES
849	TraesCS1A02G163200	TraesCS1B02G179100	TraesCS1D02G159300	23.503	27.9833	24.3092	27.9833	YES
850	TraesCS1A02G163400	TraesCS1B02G179900	TraesCS1D02G160000	6.2655	11.9951	7.30359	11.9951	YES
851	TraesCS1A02G163700	TraesCS1B02G180400	TraesCS1D02G160500	53.4131	65.0803	63.7185	65.0803	YES
852	TraesCS1A02G164200	TraesCS1B02G181000	TraesCS1D02G161200	18.9352	17.4773	15.964	18.9352	YES
853	TraesCS1A02G164300	TraesCS1B02G181100	TraesCS1D02G151100	0.852557	2.0965	1.18746	2.0965	YES
854	TraesCS1A02G164700	TraesCS1B02G181600	TraesCS1D02G161800	4.31305	5.60183	5.75827	5.75827	YES
855	TraesCS1A02G164800	TraesCS1B02G181800	TraesCS1D02G161900	5.99886	8.0527	5.77586	8.0527	YES
856	TraesCS1A02G164900	TraesCS1B02G182000	TraesCS1D02G162000	0.257852	0.121312	0.572923	0.572923	YES
857	TraesCS1A02G165300	TraesCS1B02G182100	TraesCS1D02G175300	6.96227	3.4635	3.51457	6.96227	YES
858	TraesCS1A02G165400	TraesCS1B02G182200	TraesCS1D02G175200	0.278547	0.564995	0.315026	0.564995	YES
859	TraesCS1A02G165700	TraesCS1B02G182400	TraesCS1D02G175000	2.59298	1.20272	2.30557	2.59298	YES
860	TraesCS1A02G165800	TraesCS1B02G182500	TraesCS1D02G174900	12.9967	21.5444	13.8374	21.5444	YES
861	TraesCS1A02G165900	TraesCS1B02G182600	TraesCS1D02G174800	12.2197	13.8938	8.96004	13.8938	YES
862	TraesCS1A02G166000	TraesCS1B02G182700	TraesCS1D02G174700	0.3909	18.4038	2.24813	18.4038	YES
863	TraesCS1A02G166400	TraesCS1B02G183000	TraesCS1D02G174300	0	0.867415	3.17181	3.17181	YES
864	TraesCS1A02G166500	TraesCS1B02G182900	TraesCS1D02G174200	0	0	0	0	NO
865	TraesCS1A02G166600	TraesCS1B02G183100	TraesCS1D02G174100	0.0456551	0.0634167	0.0326431	0.0634167	NO
866	TraesCS1A02G166900	TraesCS1B02G183200	TraesCS1D02G174000	3.96812	8.2866	5.38706	8.2866	YES
867	TraesCS1A02G167000	TraesCS1B02G183400	TraesCS1D02G173900	0	1.16268	0.601246	1.16268	YES
868	TraesCS1A02G167100	TraesCS1B02G183500	TraesCS1D02G173800	0.792605	11.13	14.3429	14.3429	YES
869	TraesCS1A02G167200	TraesCS1B02G183600	TraesCS1D02G173700	37.4185	26.9338	24.0267	37.4185	YES
870	TraesCS1A02G167300	TraesCS1B02G183700	TraesCS1D02G173600	2.55298	4.64266	2.68582	4.64266	YES
871	TraesCS1A02G167400	TraesCS1B02G183800	TraesCS1D02G173500	14.2408	10.0405	12.4345	14.2408	YES
872	TraesCS1A02G167500	TraesCS1B02G183900	TraesCS1D02G173400	0	0	0	0	NO
873	TraesCS1A02G167600	TraesCS1B02G184000	TraesCS1D02G173300	3.25742	2.68752	1.83785	3.25742	YES
874	TraesCS1A02G167700	TraesCS1B02G184100	TraesCS1D02G173200	0.0621393	0.0706829	0.763223	0.763223	YES
875	TraesCS1A02G167800	TraesCS1B02G184200	TraesCS1D02G173100	0	0	0	0	NO
876	TraesCS1A02G167900	TraesCS1B02G184300	TraesCS1D02G173000	0	3.54641	0.0863847	3.54641	YES
877	TraesCS1A02G168100	TraesCS1B02G184500	TraesCS1D02G172800	0.818879	0.656543	0.252631	0.818879	YES
878	TraesCS1A02G168300	TraesCS1B02G184600	TraesCS1D02G172700	0	0.109749	0.167504	0.167504	NO
879	TraesCS1A02G168400	TraesCS1B02G188500	TraesCS1D02G166400	1.88129	4.61435	2.345	4.61435	YES
880	TraesCS1A02G168500	TraesCS1B02G188400	TraesCS1D02G166500	1.21738	2.83488	4.35145	4.35145	YES
881	TraesCS1A02G168600	TraesCS1B02G188300	TraesCS1D02G166600	27.9601	23.6777	24.7146	27.9601	YES
882	TraesCS1A02G168700	TraesCS1B02G188200	TraesCS1D02G166700	3.15524	2.79991	2.19696	3.15524	YES
883	TraesCS1A02G168800	TraesCS1B02G188100	TraesCS1D02G166800	3.39009	3.26319	4.54059	4.54059	YES
884	TraesCS1A02G168900	TraesCS1B02G188000	TraesCS1D02G166900	17.4262	13.66	14.8598	17.4262	YES
885	TraesCS1A02G169000	TraesCS1B02G187900	TraesCS1D02G167000	11.7754	9.35743	10.1095	11.7754	YES
886	TraesCS1A02G169100	TraesCS1B02G187800	TraesCS1D02G167100	24.2232	13.5413	12.9729	24.2232	YES
887	TraesCS1A02G169200	TraesCS1B02G187700	TraesCS1D02G167200	5.41412	4.7092	3.48564	5.41412	YES
888	TraesCS1A02G169300	TraesCS1B02G187600	TraesCS1D02G167300	18.0594	17.5569	21.6931	21.6931	YES
889	TraesCS1A02G169500	TraesCS1B02G187500	TraesCS1D02G167400	2.67762	3.26799	2.08597	3.26799	YES
890	TraesCS1A02G169600	TraesCS1B02G187400	TraesCS1D02G167500	5.18941	2.67495	7.47535	7.47535	YES
891	TraesCS1A02G170000	TraesCS1B02G187200	TraesCS1D02G167600	38.0749	49.3448	47.6378	49.3448	YES
892	TraesCS1A02G170100	TraesCS1B02G186800	TraesCS1D02G167800	47.0133	38.9411	64.5834	64.5834	YES
893	TraesCS1A02G170200	TraesCS1B02G186900	TraesCS1D02G167900	6.59462	1.55617	7.41521	7.41521	YES
894	TraesCS1A02G170300	TraesCS1B02G187000	TraesCS1D02G168000	5.96049	8.40577	9.85468	9.85468	YES
895	TraesCS1A02G170400	TraesCS1B02G187100	TraesCS1D02G168100	8.21925	10.6137	12.9186	12.9186	YES
896	TraesCS1A02G170600	TraesCS1B02G186700	TraesCS1D02G168300	5.69306	7.45669	10.3002	10.3002	YES
897	TraesCS1A02G170700	TraesCS1B02G186600	TraesCS1D02G168400	4.63665	0.96989	0.529031	4.63665	YES
898	TraesCS1A02G170800	TraesCS1B02G186500	TraesCS1D02G168500	2.97675	3.95467	4.00931	4.00931	YES
899	TraesCS1A02G170900	TraesCS1B02G186400	TraesCS1D02G168600	10.4538	7.70089	10.2887	10.4538	YES
900	TraesCS1A02G171000	TraesCS1B02G186300	TraesCS1D02G168700	31.7383	44.3587	33.5037	44.3587	YES
901	TraesCS1A02G171100	TraesCS1B02G186200	TraesCS1D02G168800	16.5841	21.3333	23.8958	23.8958	YES
902	TraesCS1A02G171200	TraesCS1B02G186100	TraesCS1D02G168900	2.92743	3.17357	7.93629	7.93629	YES
903	TraesCS1A02G171400	TraesCS1B02G185600	TraesCS1D02G171800	5.06606	2.84073	4.10903	5.06606	YES
904	TraesCS1A02G171500	TraesCS1B02G185400	TraesCS1D02G171900	1.83869	1.90266	2.16661	2.16661	YES
905	TraesCS1A02G171600	TraesCS1B02G185100	TraesCS1D02G172100	18.1256	14.6043	34.8448	34.8448	YES
906	TraesCS1A02G171700	TraesCS1B02G185000	TraesCS1D02G172200	7.96854	4.21374	5.65793	7.96854	YES
907	TraesCS1A02G171800	TraesCS1B02G184900	TraesCS1D02G172300	16.028	21.5983	60.3439	60.3439	YES
908	TraesCS1A02G171900	TraesCS1B02G184800	TraesCS1D02G172400	0.375246	0.0343729	0.0612939	0.375246	NO
909	TraesCS1A02G172100	TraesCS1B02G184700	TraesCS1D02G172600	13.2296	12.524	12.4857	13.2296	YES
910	TraesCS1A02G172300	TraesCS1B02G205000	TraesCS1D02G166300	7.06483	6.24161	9.08249	9.08249	YES
911	TraesCS1A02G172600	TraesCS1B02G191700	TraesCS1D02G166000	9.67261	2.0917	1.69379	9.67261	YES
912	TraesCS1A02G172700	TraesCS1B02G191600	TraesCS1D02G166100	6.63577	5.95136	5.66959	6.63577	YES
913	TraesCS1A02G172800	TraesCS1B02G191500	TraesCS1D02G165900	7.25275	1.14058	0.340461	7.25275	YES
914	TraesCS1A02G172900	TraesCS1B02G191400	TraesCS1D02G165800	0	0	0	0	NO
915	TraesCS1A02G173000	TraesCS1B02G191300	TraesCS1D02G165700	0.151605	0.303545	0	0.303545	NO
916	TraesCS1A02G173100	TraesCS1B02G191200	TraesCS1D02G165600	8.52591	10.836	11.3432	11.3432	YES
917	TraesCS1A02G173200	TraesCS1B02G191100	TraesCS1D02G165500	13.6237	18.6042	18.2325	18.6042	YES
918	TraesCS1A02G173400	TraesCS1B02G191000	TraesCS1D02G165400	146.396	160.478	137.224	160.478	YES
919	TraesCS1A02G173600	TraesCS1B02G190800	TraesCS1D02G165200	0.937534	0.444203	0.576431	0.937534	YES
920	TraesCS1A02G173700	TraesCS1B02G190700	TraesCS1D02G165100	1.51317	1.70264	1.26808	1.70264	YES
921	TraesCS1A02G174500	TraesCS1B02G190000	TraesCS1D02G164600	3.44565	10.1205	8.86356	10.1205	YES
922	TraesCS1A02G174600	TraesCS1B02G189900	TraesCS1D02G164500	35.0064	28.3727	33.3849	35.0064	YES
923	TraesCS1A02G174900	TraesCS1B02G189800	TraesCS1D02G164200	0.272735	1.59617	2.50309	2.50309	YES
924	TraesCS1A02G175000	TraesCS1B02G189700	TraesCS1D02G164100	6.71481	4.72447	7.7623	7.7623	YES
925	TraesCS1A02G175200	TraesCS1B02G189400	TraesCS1D02G163900	9.27651	7.77932	2.71803	9.27651	YES
926	TraesCS1A02G175500	TraesCS1B02G204900	TraesCS1D02G163800	2.79852	0.249896	0.888773	2.79852	YES
927	TraesCS1A02G175600	TraesCS1B02G204800	TraesCS1D02G163700	1.25147	1.15721	1.38924	1.38924	YES
928	TraesCS1A02G175700	TraesCS1B02G204600	TraesCS1D02G163300	1.85767	1.02729	0.811054	1.85767	YES
929	TraesCS1A02G175800	TraesCS1B02G204500	TraesCS1D02G163200	6.57336	4.43231	5.48861	6.57336	YES
930	TraesCS1A02G175900	TraesCS1B02G204300	TraesCS1D02G162900	12.0877	14.2425	10.335	14.2425	YES
931	TraesCS1A02G176000	TraesCS1B02G204100	TraesCS1D02G162800	15.7516	8.3464	9.90353	15.7516	YES
932	TraesCS1A02G176100	TraesCS2B02G541200	TraesCS7D02G134200	0.0263744	0.0179065	0.120906	0.120906	NO
933	TraesCS1A02G176200	TraesCS1B02G203900	TraesCS1D02G162700	2.98684	3.43056	2.75839	3.43056	YES
934	TraesCS1A02G176300	TraesCS1B02G203800	TraesCS1D02G162600	16.4157	8.95761	11.5565	16.4157	YES
935	TraesCS1A02G176500	TraesCS1B02G203600	TraesCS1D02G162500	40.8763	32.9047	39.9802	40.8763	YES
936	TraesCS1A02G176700	TraesCS1B02G203300	TraesCS1D02G162400	9.50958	3.91717	6.63788	9.50958	YES
937	TraesCS1A02G176800	TraesCS1B02G203400	TraesCS1D02G162300	17.7446	3.7615	18.3522	18.3522	YES
938	TraesCS1A02G176900	TraesCS1B02G203500	TraesCS1D02G162200	5.29502	4.93101	11.5389	11.5389	YES
939	TraesCS1A02G177000	TraesCS1B02G203200	TraesCS1D02G175400	2.40538	2.30338	0.928432	2.40538	YES
940	TraesCS1A02G177300	TraesCS1B02G203000	TraesCS1D02G175700	1.20956	0.842718	0.983099	1.20956	YES
941	TraesCS1A02G177400	TraesCS1B02G202800	TraesCS1D02G175900	7.28738	7.60037	6.82114	7.60037	YES
942	TraesCS1A02G177500	TraesCS1B02G202700	TraesCS1D02G176000	4.6431	4.70272	6.74178	6.74178	YES
943	TraesCS1A02G177600	TraesCS1B02G202600	TraesCS1D02G176100	8.18174	9.16567	10.9272	10.9272	YES
944	TraesCS1A02G177700	TraesCS1B02G202500	TraesCS1D02G176200	12.5093	13.4764	12.5648	13.4764	YES
945	TraesCS1A02G177800	TraesCS1B02G202400	TraesCS1D02G176400	0.569691	0.158	0.175002	0.569691	YES
946	TraesCS1A02G178000	TraesCS1B02G202300	TraesCS1D02G176500	0.234883	0.10545	0.154247	0.234883	NO
947	TraesCS1A02G178200	TraesCS1B02G202100	TraesCS1D02G176700	5.17855	6.00081	10.9936	10.9936	YES
948	TraesCS1A02G178300	TraesCS1B02G202000	TraesCS1D02G176800	13.9765	10.5224	14.3217	14.3217	YES
949	TraesCS1A02G178400	TraesCS1B02G201900	TraesCS1D02G176900	3.8731	2.96557	3.44168	3.8731	YES
950	TraesCS1A02G178600	TraesCS1B02G201600	TraesCS1D02G177100	1.14253	1.18629	0.971706	1.18629	YES
951	TraesCS1A02G178700	TraesCS1B02G201800	TraesCS1D02G177000	38.4621	0	6.20247	38.4621	YES
952	TraesCS1A02G178800	TraesCS1B02G201500	TraesCS1D02G177300	0.0857743	0.0408118	0.0841334	0.0857743	NO
953	TraesCS1A02G179000	TraesCS1B02G201400	TraesCS1D02G177400	71.6344	69.3042	75.6664	75.6664	YES
954	TraesCS1A02G179200	TraesCS1B02G201300	TraesCS1D02G177500	0	0.533732	0	0.533732	YES
955	TraesCS1A02G179300	TraesCS1B02G201200	TraesCS1D02G177600	0	0	0.22319	0.22319	NO
956	TraesCS1A02G179400	TraesCS1B02G201100	TraesCS1D02G177700	22.6385	6.32619	7.99204	22.6385	YES
957	TraesCS1A02G179500	TraesCS1B02G201000	TraesCS1D02G177800	1.92672	5.29515	4.9168	5.29515	YES
958	TraesCS1A02G179600	TraesCS1B02G200900	TraesCS1D02G177900	17.5547	16.9761	12.3983	17.5547	YES
959	TraesCS1A02G179700	TraesCS1B02G200700	TraesCS1D02G178000	2.82432	2.22439	3.06743	3.06743	YES
960	TraesCS1A02G180000	TraesCS1B02G200600	TraesCS1D02G178200	0.100261	0.244706	0.187329	0.244706	NO
961	TraesCS1A02G180100	TraesCS1B02G200400	TraesCS1D02G178300	27.2304	24.2024	31.7955	31.7955	YES
962	TraesCS1A02G180200	TraesCS1B02G200300	TraesCS1D02G178400	3.83099	4.05867	6.34294	6.34294	YES
963	TraesCS1A02G180300	TraesCS1B02G200200	TraesCS1D02G178500	18.9495	25.1197	18.2621	25.1197	YES
964	TraesCS1A02G180400	TraesCS1B02G200100	TraesCS1D02G178600	2.69682	2.57934	3.76725	3.76725	YES
965	TraesCS1A02G180500	TraesCS1B02G200000	TraesCS1D02G184100	5.88462	4.65213	6.6465	6.6465	YES
966	TraesCS1A02G180700	TraesCS1B02G199900	TraesCS1D02G184200	0.812163	0.135344	0.0723927	0.812163	YES
967	TraesCS1A02G180800	TraesCS1B02G199700	TraesCS1D02G184400	3.85123	1.39336	1.66401	3.85123	YES
968	TraesCS1A02G181000	TraesCS1B02G199600	TraesCS1D02G184500	54.3754	28.1432	29.9945	54.3754	YES
969	TraesCS1A02G181100	TraesCS1B02G199500	TraesCS1D02G184600	7.17627	8.0953	6.11966	8.0953	YES
970	TraesCS1A02G181400	TraesCS1B02G199400	TraesCS1D02G184700	6.19632	3.73806	2.23435	6.19632	YES
971	TraesCS1A02G181500	TraesCS1B02G199300	TraesCS1D02G184800	63.9343	61.7656	25.7485	63.9343	YES
972	TraesCS1A02G181600	TraesCS1B02G199200	TraesCS1D02G184900	4.1986	3.73591	8.51787	8.51787	YES
973	TraesCS1A02G181900	TraesCS1B02G199100	TraesCS1D02G185000	11.3227	9.94395	10.2944	11.3227	YES
974	TraesCS1A02G182000	TraesCS1B02G199000	TraesCS1D02G185100	4.64133	3.16911	4.09697	4.64133	YES
975	TraesCS1A02G182100	TraesCS1B02G198900	TraesCS1D02G185200	3.1312	2.27963	3.73996	3.73996	YES
976	TraesCS1A02G182200	TraesCS1B02G198800	TraesCS1D02G185300	0.0119091	0.581442	0.0249214	0.581442	YES
977	TraesCS1A02G182300	TraesCS1B02G198700	TraesCS1D02G185500	1.59652	2.5642	2.18678	2.5642	YES
978	TraesCS1A02G182400	TraesCS1B02G198500	TraesCS1D02G185600	50.5762	44.5053	33.564	50.5762	YES
979	TraesCS1A02G182500	TraesCS1B02G198400	TraesCS1D02G185700	12.4741	10.1159	11.6297	12.4741	YES
980	TraesCS1A02G182600	TraesCS1B02G198100	TraesCS1D02G185900	2.50259	2.18276	1.21023	2.50259	YES
981	TraesCS1A02G182700	TraesCS1B02G198000	TraesCS1D02G186100	10.5552	12.2244	11.4114	12.2244	YES
982	TraesCS1A02G182800	TraesCS1B02G197700	TraesCS1D02G186300	3.78865	3.69973	4.80495	4.80495	YES
983	TraesCS1A02G182900	TraesCS1B02G197800	TraesCS1D02G186400	4.13271	3.64212	4.15047	4.15047	YES
984	TraesCS1A02G183000	TraesCS1B02G197900	TraesCS1D02G186500	1.13707	0.815212	0.71905	1.13707	YES
985	TraesCS1A02G183100	TraesCS1B02G197600	TraesCS1D02G186600	18.9062	13.3278	21.2129	21.2129	YES
986	TraesCS1A02G183300	TraesCS1B02G191900	TraesCS1D02G193900	0.884765	1.33925	1.64082	1.64082	YES
987	TraesCS1A02G183400	TraesCS1B02G191800	TraesCS1D02G193800	0.224906	0.203354	0.206604	0.224906	NO
988	TraesCS1A02G183500	TraesCS1B02G205200	TraesCS1D02G193700	0.433057	0.30436	0.601729	0.601729	YES
989	TraesCS1A02G183800	TraesCS1B02G205300	TraesCS1D02G192900	3.27609	2.06856	1.92629	3.27609	YES
990	TraesCS1A02G183900	TraesCS1B02G205400	TraesCS1D02G192800	1.15356	1.06482	1.43104	1.43104	YES
991	TraesCS1A02G184000	TraesCS1B02G205500	TraesCS1D02G192600	0.0386024	0.0930892	0.0299805	0.0930892	NO
992	TraesCS1A02G184100	TraesCS1B02G205600	TraesCS1D02G192500	10.8247	13.0664	9.18436	13.0664	YES
993	TraesCS1A02G184300	TraesCS1B02G205700	TraesCS1D02G192400	35.6337	17.7351	36.6875	36.6875	YES
994	TraesCS1A02G184500	TraesCS1B02G192600	TraesCS1D02G192200	3.0681	7.85903	9.50332	9.50332	YES
995	TraesCS1A02G184600	TraesCS1B02G192700	TraesCS1D02G192100	10.6808	10.3581	10.7023	10.7023	YES
996	TraesCS1A02G184800	TraesCS1B02G192800	TraesCS1D02G192000	7.8784	7.91366	9.52916	9.52916	YES
997	TraesCS1A02G184900	TraesCS1B02G192900	TraesCS1D02G191900	9.06418	9.68074	9.90772	9.90772	YES
998	TraesCS1A02G185100	TraesCS1B02G193000	TraesCS1D02G191800	0.947688	1.24843	2.50406	2.50406	YES
999	TraesCS1A02G185200	TraesCS1B02G193100	TraesCS1D02G191700	0	4.84264	0	4.84264	YES
1000	TraesCS1A02G185300	TraesCS1B02G193200	TraesCS1D02G191600	6.3735	4.51738	4.2065	6.3735	YES
1001	TraesCS1A02G185400	TraesCS1B02G193300	TraesCS1D02G191500	18.1169	13.4316	5.92296	18.1169	YES
1002	TraesCS1A02G185800	TraesCS1B02G193600	TraesCS1D02G190800	2.69158	1.08321	0.744941	2.69158	YES
1003	TraesCS1A02G185900	TraesCS1B02G193700	TraesCS1D02G190900	6.34274	4.13897	4.00153	6.34274	YES
1004	TraesCS1A02G186000	TraesCS1B02G193800	TraesCS1D02G191000	1.16573	1.39971	0.618186	1.39971	YES
1005	TraesCS1A02G186200	TraesCS1B02G194000	TraesCS1D02G190600	1.29048	1.84572	14.9459	14.9459	YES
1006	TraesCS1A02G186300	TraesCS1B02G194100	TraesCS1D02G190300	0.0327956	0.150006	0.169586	0.169586	NO
1007	TraesCS1A02G186400	TraesCS1B02G194200	TraesCS1D02G190200	0.096339	0	0.053417	0.096339	NO
1008	TraesCS1A02G186500	TraesCS1B02G194300	TraesCS1D02G190100	0.421273	1.01573	0.135246	1.01573	YES
1009	TraesCS1A02G186700	TraesCS1B02G194700	TraesCS1D02G189800	0.304952	0.392307	0.323952	0.392307	NO
1010	TraesCS1A02G187000	TraesCS1B02G194900	TraesCS1D02G189600	0.224369	0.202382	0.222209	0.224369	NO
1011	TraesCS1A02G187100	TraesCS1B02G195000	TraesCS1D02G189500	0.0361134	0.359416	0	0.359416	NO
1012	TraesCS1A02G187200	TraesCS3B02G300500	TraesCS2D02G414400	0	0	0	0	NO
1013	TraesCS1A02G187300	TraesCS1B02G195100	TraesCS1D02G189400	9.36825	6.80443	9.50139	9.50139	YES
1014	TraesCS1A02G187400	TraesCS1B02G195200	TraesCS1D02G189300	9.66381	9.70135	7.67193	9.70135	YES
1015	TraesCS1A02G187500	TraesCS1B02G195300	TraesCS1D02G189200	5.94597	3.4812	1.75285	5.94597	YES
1016	TraesCS1A02G187600	TraesCS1B02G195400	TraesCS1D02G189000	6.19381	10.8659	4.21462	10.8659	YES
1017	TraesCS1A02G187700	TraesCS1B02G195500	TraesCS1D02G188900	0.265518	1.25991	0.302042	1.25991	YES
1018	TraesCS1A02G187800	TraesCS1B02G195600	TraesCS1D02G188800	1.54279	1.83387	2.42982	2.42982	YES
1019	TraesCS1A02G187900	TraesCS1B02G195700	TraesCS1D02G188700	0.112312	0.0383875	0.0497945	0.112312	NO
1020	TraesCS1A02G188000	TraesCS1B02G195800	TraesCS1D02G188500	4.0978	9.34122	2.13684	9.34122	YES
1021	TraesCS1A02G188100	TraesCS1B02G195900	TraesCS1D02G188200	0	0	0.0198393	0.0198393	NO
1022	TraesCS1A02G188200	TraesCS1B02G196000	TraesCS1D02G188100	5.88759	9.20051	5.86715	9.20051	YES
1023	TraesCS1A02G188400	TraesCS1B02G196100	TraesCS1D02G188000	21.2791	20.8989	0	21.2791	YES
1024	TraesCS1A02G188600	TraesCS1B02G196300	TraesCS1D02G187800	2.80522	3.41595	3.1232	3.41595	YES
1025	TraesCS1A02G188700	TraesCS1B02G196400	TraesCS1D02G187700	22.5062	13.902	14.8844	22.5062	YES
1026	TraesCS1A02G188800	TraesCS1B02G196500	TraesCS1D02G187600	12.1767	11.7734	8.83021	12.1767	YES
1027	TraesCS1A02G188900	TraesCS1B02G196600	TraesCS1D02G187500	7.22397	8.90618	9.17478	9.17478	YES
1028	TraesCS1A02G189000	TraesCS1B02G196700	TraesCS1D02G187400	7.82822	8.67662	7.37472	8.67662	YES
1029	TraesCS1A02G189100	TraesCS1B02G196800	TraesCS1D02G187300	3.21649	2.67794	3.94655	3.94655	YES
1030	TraesCS1A02G189200	TraesCS1B02G196900	TraesCS1D02G187200	0.653214	0.374828	0.839863	0.839863	YES
1031	TraesCS1A02G189300	TraesCS1B02G197000	TraesCS1D02G187100	1.27007	3.56452	4.10669	4.10669	YES
1032	TraesCS1A02G189500	TraesCS1B02G197100	TraesCS1D02G187000	3.44847	10.0221	8.39908	10.0221	YES
1033	TraesCS1A02G189600	TraesCS1B02G197200	TraesCS1D02G186900	5.87851	7.25855	11.0444	11.0444	YES
1034	TraesCS1A02G189900	TraesCS1B02G192000	TraesCS1D02G194000	0.168391	0.0247859	0.76586	0.76586	YES
1035	TraesCS1A02G190000	TraesCS1B02G192100	TraesCS1D02G194100	0.757275	1.35935	1.26584	1.35935	YES
1036	TraesCS1A02G190100	TraesCS1B02G192200	TraesCS1D02G194200	0.412155	0.238754	0.550122	0.550122	YES
1037	TraesCS1A02G190200	TraesCS1B02G192300	TraesCS1D02G194300	9.33036	16.0585	10.9912	16.0585	YES
1038	TraesCS1A02G190300	TraesCS1B02G192400	TraesCS1D02G194500	0.0494198	0.0259541	0.168356	0.168356	NO
1039	TraesCS1A02G190800	TraesCS1B02G206000	TraesCS1D02G194800	12.6216	8.05251	16.4208	16.4208	YES
1040	TraesCS1A02G190900	TraesCS1B02G206100	TraesCS1D02G194900	26.5375	42.1386	47.0496	47.0496	YES
1041	TraesCS1A02G191000	TraesCS3B02G402300	TraesCS3D02G363300	1.55567	0	0	1.55567	YES
1042	TraesCS1A02G191300	TraesCS1B02G206200	TraesCS1D02G195000	2.86954	3.14999	3.39011	3.39011	YES
1043	TraesCS1A02G191400	TraesCS1B02G206300	TraesCS1D02G195100	29.4609	18.7166	21.8959	29.4609	YES
1044	TraesCS1A02G191600	TraesCS7B02G213400	TraesCS1D02G195200	0.745007	8.26277	1.0786	8.26277	YES
1045	TraesCS1A02G191700	TraesCS1B02G206600	TraesCS1D02G195300	7.96849	10.5231	0.492972	10.5231	YES
1046	TraesCS1A02G191800	TraesCS1B02G206800	TraesCS1D02G195400	1.30034	0.855386	0.522596	1.30034	YES
1047	TraesCS1A02G191900	TraesCS1B02G206900	TraesCS1D02G195500	12.8551	26.7229	17.9094	26.7229	YES
1048	TraesCS1A02G192100	TraesCS5B02G077100	TraesCS4D02G335800	0	0	0	0	NO
1049	TraesCS1A02G192300	TraesCS1B02G207100	TraesCS1D02G195700	17.8568	11.1703	14.7901	17.8568	YES
1050	TraesCS1A02G192400	TraesCS1B02G207300	TraesCS1D02G195800	13.9528	13.7782	9.30116	13.9528	YES
1051	TraesCS1A02G192500	TraesCS1B02G207500	TraesCS1D02G195900	6.27248	0.979549	2.92058	6.27248	YES
1052	TraesCS1A02G192700	TraesCS1B02G207600	TraesCS1D02G196000	0	1.09878	0.70528	1.09878	YES
1053	TraesCS1A02G192800	TraesCS1B02G207700	TraesCS1D02G196400	16.5352	4.2948	1.34685	16.5352	YES
1054	TraesCS1A02G192900	TraesCS2B02G408400	TraesCS1D02G196500	0.124081	0.918348	0.307178	0.918348	YES
1055	TraesCS1A02G193000	TraesCS1B02G207900	TraesCS1D02G196700	19.5213	13.8414	12.2847	19.5213	YES
1056	TraesCS1A02G193200	TraesCS1B02G208000	TraesCS1D02G196900	12.5405	11.5174	11.2652	12.5405	YES
1057	TraesCS1A02G193300	TraesCS1B02G208100	TraesCS1D02G197000	4.10899	4.99072	4.87854	4.99072	YES
1058	TraesCS1A02G193400	TraesCS1B02G208400	TraesCS1D02G197300	13.1476	11.2984	14.0476	14.0476	YES
1059	TraesCS1A02G193500	TraesCS1B02G208500	TraesCS1D02G197400	25.6549	20.8865	24.2089	25.6549	YES
1060	TraesCS1A02G193600	TraesCS1B02G208600	TraesCS1D02G197500	2.63142	1.54049	1.94633	2.63142	YES
1061	TraesCS1A02G193700	TraesCS1B02G208700	TraesCS1D02G197600	1.31909	0.761371	1.97795	1.97795	YES
1062	TraesCS1A02G193900	TraesCS1B02G208900	TraesCS1D02G197800	23.5506	9.71929	9.68923	23.5506	YES
1063	TraesCS1A02G194000	TraesCS1B02G209000	TraesCS1D02G197900	103.138	86.6493	308.566	308.566	YES
1064	TraesCS1A02G194100	TraesCS1B02G209100	TraesCS1D02G198000	33.7702	31.8188	36.6523	36.6523	YES
1065	TraesCS1A02G194400	TraesCS1B02G209300	TraesCS1D02G198100	14.7162	11.781	10.3484	14.7162	YES
1066	TraesCS1A02G194500	TraesCS1B02G209400	TraesCS1D02G198200	5.75272	6.84045	6.82458	6.84045	YES
1067	TraesCS1A02G194700	TraesCS1B02G209500	TraesCS1D02G198300	0.0656541	0.0462516	0.0510082	0.0656541	NO
1068	TraesCS1A02G194800	TraesCS1B02G209600	TraesCS1D02G198400	7.00403	4.98627	7.40966	7.40966	YES
1069	TraesCS1A02G194900	TraesCS1B02G209700	TraesCS1D02G198500	2.26499	2.67119	3.80586	3.80586	YES
1070	TraesCS1A02G195100	TraesCS1B02G209800	TraesCS1D02G198600	14.7198	14.9754	2.67697	14.9754	YES
1071	TraesCS1A02G195200	TraesCS1B02G209900	TraesCS1D02G198700	7.20416	4.55807	5.73839	7.20416	YES
1072	TraesCS1A02G195300	TraesCS1B02G210000	TraesCS1D02G198800	11.9201	11.0116	15.0629	15.0629	YES
1073	TraesCS1A02G195400	TraesCS1B02G210300	TraesCS1D02G199200	36.4498	30.6749	30.338	36.4498	YES
1074	TraesCS1A02G195700	TraesCS1B02G210400	TraesCS1D02G199000	9.65282	7.48992	9.62086	9.65282	YES
1075	TraesCS1A02G195900	TraesCS1B02G210500	TraesCS1D02G199300	0.0719319	0.22902	0.239853	0.239853	NO
1076	TraesCS1A02G196100	TraesCS1B02G210700	TraesCS1D02G199500	0.367591	0.34094	0.320283	0.367591	NO
1077	TraesCS1A02G196200	TraesCS1B02G210800	TraesCS1D02G199600	0.630223	0.786901	0.708472	0.786901	YES
1078	TraesCS1A02G196300	TraesCS1B02G210900	TraesCS1D02G199700	45.2809	40.1685	35.8257	45.2809	YES
1079	TraesCS1A02G196400	TraesCS1B02G211000	TraesCS1D02G199800	1.27898	3.3942	4.60429	4.60429	YES
1080	TraesCS1A02G196500	TraesCS1B02G211100	TraesCS1D02G200000	0.988104	1.11758	1.0673	1.11758	YES
1081	TraesCS1A02G196600	TraesCS1B02G211200	TraesCS1D02G200100	8.08312	19.5101	13.8661	19.5101	YES
1082	TraesCS1A02G196700	TraesCS1B02G211300	TraesCS1D02G200200	19.0261	13.9463	22.1548	22.1548	YES
1083	TraesCS1A02G196800	TraesCS1B02G211400	TraesCS1D02G200300	4.3263	7.11186	6.64726	7.11186	YES
1084	TraesCS1A02G197000	TraesCS1B02G211600	TraesCS1D02G200500	0.336681	0.600044	2.67071	2.67071	YES
1085	TraesCS1A02G197100	TraesCS1B02G211700	TraesCS1D02G200600	4.50106	0.806386	1.23435	4.50106	YES
1086	TraesCS1A02G197200	TraesCS1B02G211800	TraesCS1D02G200700	9.57157	18.9002	19.8787	19.8787	YES
1087	TraesCS1A02G197300	TraesCS1B02G211900	TraesCS1D02G200800	58.0713	53.573	70.418	70.418	YES
1088	TraesCS1A02G197400	TraesCS1B02G212000	TraesCS1D02G200900	0.540243	0.25442	0.129351	0.540243	YES
1089	TraesCS1A02G197500	TraesCS1B02G212100	TraesCS1D02G201000	14.8676	10.5539	15.7392	15.7392	YES
1090	TraesCS1A02G197600	TraesCS1B02G212200	TraesCS1D02G201100	11.3244	16.362	18.5901	18.5901	YES
1091	TraesCS1A02G197700	TraesCS1B02G212400	TraesCS1D02G201200	1.56845	0.504182	1.1664	1.56845	YES
1092	TraesCS1A02G197800	TraesCS1B02G212500	TraesCS1D02G201300	16.1511	13.2496	14.4935	16.1511	YES
1093	TraesCS1A02G197900	TraesCS1B02G212600	TraesCS1D02G201400	15.5844	1.50418	13.8143	15.5844	YES
1094	TraesCS1A02G198000	TraesCS1B02G212700	TraesCS1D02G201500	9.25011	7.40981	8.35214	9.25011	YES
1095	TraesCS1A02G198100	TraesCS1B02G212800	TraesCS1D02G201600	13.3179	10.8136	12.0254	13.3179	YES
1096	TraesCS1A02G198200	TraesCS1B02G212900	TraesCS1D02G201700	20.5557	18.3085	12.6977	20.5557	YES
1097	TraesCS1A02G198300	TraesCS1B02G213100	TraesCS1D02G201800	0.330357	0.22144	0.113303	0.330357	NO
1098	TraesCS1A02G198400	TraesCS1B02G213300	TraesCS1D02G202100	25.0876	26.6243	13.6177	26.6243	YES
1099	TraesCS1A02G198500	TraesCS1B02G213400	TraesCS1D02G202200	12.3016	14.4211	12.0245	14.4211	YES
1100	TraesCS1A02G198600	TraesCS1B02G213600	TraesCS1D02G202300	2.17038	2.17298	4.58026	4.58026	YES
1101	TraesCS1A02G198700	TraesCS1B02G213700	TraesCS1D02G202400	3.4801	3.44017	3.88339	3.88339	YES
1102	TraesCS1A02G198800	TraesCS1B02G213800	TraesCS1D02G202500	0.715692	0.164102	0.367176	0.715692	YES
1103	TraesCS1A02G198900	TraesCS1B02G213900	TraesCS1D02G202700	11.5406	9.35232	12.22	12.22	YES
1104	TraesCS1A02G199000	TraesCS1B02G214000	TraesCS1D02G202800	8.81667	9.24101	8.09261	9.24101	YES
1105	TraesCS1A02G199500	TraesCS1B02G214400	TraesCS1D02G203200	75.072	64.2679	32.1132	75.072	YES
1106	TraesCS1A02G199600	TraesCS1B02G214500	TraesCS1D02G203300	7.90943	1.19198	7.49695	7.90943	YES
1107	TraesCS1A02G200000	TraesCS1B02G214700	TraesCS1D02G203500	2.7968	2.0991	2.00491	2.7968	YES
1108	TraesCS1A02G200200	TraesCS1B02G214900	TraesCS1D02G203700	0.839852	0.991782	2.31626	2.31626	YES
1109	TraesCS1A02G200500	TraesCS1B02G215000	TraesCS1D02G203900	0.0755822	0.142469	0	0.142469	NO
1110	TraesCS1A02G200700	TraesCS1B02G215100	TraesCS1D02G204100	0.0522696	0.0181216	0.0566942	0.0566942	NO
1111	TraesCS1A02G200800	TraesCS1B02G215200	TraesCS1D02G204200	9.3628	12.5938	12.4067	12.5938	YES
1112	TraesCS1A02G200900	TraesCS1B02G215300	TraesCS1D02G204300	2.62843	2.13355	2.86998	2.86998	YES
1113	TraesCS1A02G201000	TraesCS1B02G215400	TraesCS1D02G204400	1.26994	6.37892	3.38468	6.37892	YES
1114	TraesCS1A02G201100	TraesCS1B02G215500	TraesCS1D02G204500	0.350747	0	0.199786	0.350747	NO
1115	TraesCS1A02G201200	TraesCS1B02G215600	TraesCS1D02G204600	2.14497	1.48655	3.52886	3.52886	YES
1116	TraesCS1A02G201300	TraesCS6B02G288000	TraesCS2D02G413300	124.254	241.908	0.553595	241.908	YES
1117	TraesCS1A02G201400	TraesCS1B02G215700	TraesCS1D02G204800	0.140673	0.0410109	0.0992889	0.140673	NO
1118	TraesCS1A02G201600	TraesCS1B02G215800	TraesCS1D02G204900	22.0077	16.4676	17.0125	22.0077	YES
1119	TraesCS1A02G201700	TraesCS1B02G216000	TraesCS1D02G205300	2.64426	1.08592	5.20546	5.20546	YES
1120	TraesCS1A02G202000	TraesCS1B02G216300	TraesCS1D02G205500	5.67673	7.30057	9.31322	9.31322	YES
1121	TraesCS1A02G202100	TraesCS1B02G216400	TraesCS1D02G205600	0	0	0	0	NO
1122	TraesCS1A02G202300	TraesCS1B02G216500	TraesCS1D02G205700	9.74957	7.64443	7.41757	9.74957	YES
1123	TraesCS1A02G202500	TraesCS1B02G216600	TraesCS1D02G205800	0	0	0	0	NO
1124	TraesCS1A02G202600	TraesCS1B02G216700	TraesCS1D02G205900	0	0	0	0	NO
1125	TraesCS1A02G202900	TraesCS1B02G216800	TraesCS1D02G206300	1.49462	0.284817	0.248734	1.49462	YES
1126	TraesCS1A02G203000	TraesCS1B02G217000	TraesCS1D02G206500	30.6355	37.3788	35.6561	37.3788	YES
1127	TraesCS1A02G203100	TraesCS1B02G217100	TraesCS1D02G206600	0.862508	0.877117	0.767466	0.877117	YES
1128	TraesCS1A02G203200	TraesCS1B02G217200	TraesCS1D02G206700	8.69744	1.48669	4.95248	8.69744	YES
1129	TraesCS1A02G203300	TraesCS1B02G217300	TraesCS1D02G206800	0	1.24731	3.28671	3.28671	YES
1130	TraesCS1A02G203400	TraesCS1B02G217500	TraesCS1D02G206900	11.0479	10.0966	10.7283	11.0479	YES
1131	TraesCS1A02G203800	TraesCS1B02G217600	TraesCS1D02G207200	0.584146	7.69104	7.73471	7.73471	YES
1132	TraesCS1A02G203900	TraesCS1B02G217700	TraesCS1D02G207400	2.57859	5.19135	0.981695	5.19135	YES
1133	TraesCS1A02G204200	TraesCS1B02G217800	TraesCS1D02G207500	6.96737	12.3671	5.50144	12.3671	YES
1134	TraesCS1A02G204300	TraesCS1B02G217900	TraesCS1D02G207600	2.08796	0.963653	0.935348	2.08796	YES
1135	TraesCS1A02G204500	TraesCS1B02G218200	TraesCS1D02G207800	0	0.829158	2.76092	2.76092	YES
1136	TraesCS1A02G204700	TraesCS1B02G218300	TraesCS1D02G208000	19.1899	20.5662	14.2748	20.5662	YES
1137	TraesCS1A02G204800	TraesCS1B02G218400	TraesCS1D02G208100	0	0.173455	0.26981	0.26981	NO
1138	TraesCS1A02G204900	TraesCS1B02G221800	TraesCS1D02G208200	0.191874	7.28683	1.1431	7.28683	YES
1139	TraesCS1A02G205000	TraesCS1B02G218600	TraesCS1D02G208300	1.18133	2.45058	3.45453	3.45453	YES
1140	TraesCS1A02G205100	TraesCS1B02G218700	TraesCS1D02G208400	6.07231	8.37596	6.61364	8.37596	YES
1141	TraesCS1A02G205200	TraesCS1B02G218800	TraesCS1D02G208500	0.104845	0	0	0.104845	NO
1142	TraesCS1A02G205300	TraesCS1B02G218900	TraesCS1D02G208600	12.5247	14.1767	11.9851	14.1767	YES
1143	TraesCS1A02G205400	TraesCS1B02G219000	TraesCS1D02G208700	14.7496	20.1501	13.5903	20.1501	YES
1144	TraesCS1A02G205600	TraesCS1B02G219100	TraesCS1D02G208800	6.07779	3.68081	3.06354	6.07779	YES
1145	TraesCS1A02G205700	TraesCS1B02G219200	TraesCS1D02G208900	17.0015	11.9959	29.2635	29.2635	YES
1146	TraesCS1A02G205900	TraesCS1B02G219400	TraesCS1D02G209100	0.499948	0.401279	0.364604	0.499948	NO
1147	TraesCS1A02G206000	TraesCS1B02G219500	TraesCS1D02G209200	0.717824	2.6107	1.79827	2.6107	YES
1148	TraesCS1A02G206100	TraesCS1B02G219700	TraesCS1D02G209400	2.96813	2.61266	1.1098	2.96813	YES
1149	TraesCS1A02G206200	TraesCS1B02G219800	TraesCS1D02G209500	4.33331	3.92162	1.76672	4.33331	YES
1150	TraesCS1A02G206300	TraesCS1B02G219900	TraesCS1D02G209600	4.46973	6.54279	2.81047	6.54279	YES
1151	TraesCS1A02G206400	TraesCS1B02G220000	TraesCS1D02G209700	1.66929	2.31561	2.93662	2.93662	YES
1152	TraesCS1A02G206500	TraesCS1B02G220100	TraesCS1D02G209800	0.101702	0	0.0360647	0.101702	NO
1153	TraesCS1A02G206700	TraesCS1B02G220300	TraesCS1D02G210000	3.63838	8.76314	9.14388	9.14388	YES
1154	TraesCS1A02G206900	TraesCS1B02G220700	TraesCS1D02G210200	5.7031	6.12112	13.5588	13.5588	YES
1155	TraesCS1A02G207000	TraesCS1B02G220800	TraesCS1D02G210300	0.293206	0.636169	0.234876	0.636169	YES
1156	TraesCS1A02G207200	TraesCS1B02G221000	TraesCS1D02G210400	0.0924476	0.230681	0.422276	0.422276	NO
1157	TraesCS1A02G207300	TraesCS1B02G221100	TraesCS1D02G210500	1.99995	0.176614	1.30453	1.99995	YES
1158	TraesCS1A02G207500	TraesCS1B02G221200	TraesCS1D02G210800	2.08515	5.55304	0.569993	5.55304	YES
1159	TraesCS1A02G207600	TraesCS1B02G221300	TraesCS1D02G210900	1.81488	1.3284	0.962548	1.81488	YES
1160	TraesCS1A02G207700	TraesCS1B02G221400	TraesCS1D02G211000	4.59281	5.37863	4.84081	5.37863	YES
1161	TraesCS1A02G207800	TraesCS1B02G221500	TraesCS1D02G211100	0.079497	0.0688809	0.0400309	0.079497	NO
1162	TraesCS1A02G207900	TraesCS1B02G221900	TraesCS1D02G211200	0.192244	0.0185792	0.0729349	0.192244	NO
1163	TraesCS1A02G208000	TraesCS1B02G222000	TraesCS1D02G211300	6.88094	6.40038	5.70767	6.88094	YES
1164	TraesCS1A02G208100	TraesCS1B02G222200	TraesCS1D02G211400	0.0857867	0	0.0624012	0.0857867	NO
1165	TraesCS1A02G208200	TraesCS1B02G222300	TraesCS1D02G211500	1.42843	0.358586	13.1724	13.1724	YES
1166	TraesCS1A02G208400	TraesCS1B02G222400	TraesCS1D02G211600	2.56209	1.79248	1.87449	2.56209	YES
1167	TraesCS1A02G208500	TraesCS1B02G222500	TraesCS1D02G211700	10.3712	6.57511	8.0489	10.3712	YES
1168	TraesCS1A02G208600	TraesCS1B02G222600	TraesCS1D02G211800	3.06695	1.71049	2.15482	3.06695	YES
1169	TraesCS1A02G208700	TraesCS1B02G222700	TraesCS1D02G211900	0.268787	0.0720122	0.182165	0.268787	NO
1170	TraesCS1A02G208800	TraesCS1B02G223000	TraesCS1D02G212100	3.61019	0.644129	2.64935	3.61019	YES
1171	TraesCS1A02G208900	TraesCS1B02G223100	TraesCS1D02G212200	0.647817	1.03961	1.27067	1.27067	YES
1172	TraesCS1A02G209000	TraesCS1B02G223200	TraesCS1D02G212300	0.600168	0.546316	0.62365	0.62365	YES
1173	TraesCS1A02G209100	TraesCS1B02G223300	TraesCS1D02G212400	49.2151	45.5158	92.3698	92.3698	YES
1174	TraesCS1A02G209400	TraesCS1B02G223400	TraesCS1D02G212800	1.24632	1.5595	1.13929	1.5595	YES
1175	TraesCS1A02G209500	TraesCS1B02G223500	TraesCS1D02G212900	0.131803	0.594022	0	0.594022	YES
1176	TraesCS1A02G209600	TraesCS1B02G223600	TraesCS1D02G213000	36.1433	61.8866	60.5893	61.8866	YES
1177	TraesCS1A02G210000	TraesCS1B02G224000	TraesCS1D02G213300	0	0.1798	0	0.1798	NO
1178	TraesCS1A02G210200	TraesCS1B02G224100	TraesCS1D02G213500	35.6918	30.3704	49.7285	49.7285	YES
1179	TraesCS1A02G210300	TraesCS1B02G224200	TraesCS1D02G213600	16.0212	14.599	13.0349	16.0212	YES
1180	TraesCS1A02G210400	TraesCS1B02G224300	TraesCS1D02G213700	11.7699	2.51429	12.4458	12.4458	YES
1181	TraesCS1A02G210500	TraesCS1B02G224500	TraesCS1D02G213800	9.96068	2.08553	3.16426	9.96068	YES
1182	TraesCS1A02G210600	TraesCS1B02G224600	TraesCS1D02G213900	0.487954	1.60932	1.34409	1.60932	YES
1183	TraesCS1A02G210700	TraesCS1B02G224700	TraesCS1D02G214000	0.752584	1.3512	0.861864	1.3512	YES
1184	TraesCS1A02G210800	TraesCS1B02G224800	TraesCS1D02G214100	6.90722	8.55107	7.4236	8.55107	YES
1185	TraesCS1A02G210900	TraesCS1B02G224900	TraesCS1D02G214200	0.117362	0.0219004	0.0152318	0.117362	NO
1186	TraesCS1A02G211000	TraesCS1B02G225000	TraesCS1D02G214300	0.0990451	0.844138	1.21414	1.21414	YES
1187	TraesCS1A02G211200	TraesCS1B02G225100	TraesCS1D02G214500	0.0634205	0.0404239	1.22045	1.22045	YES
1188	TraesCS1A02G211300	TraesCS1B02G225200	TraesCS1D02G214600	0.0175605	0.0194226	0.0228168	0.0228168	NO
1189	TraesCS1A02G211500	TraesCS1B02G225300	TraesCS1D02G214700	2.06156	3.13774	5.64738	5.64738	YES
1190	TraesCS1A02G211600	TraesCS1B02G225400	TraesCS1D02G214800	3.09339	2.0703	1.32429	3.09339	YES
1191	TraesCS1A02G211800	TraesCS1B02G225500	TraesCS1D02G214900	0.255887	1.18827	0.723994	1.18827	YES
1192	TraesCS1A02G211900	TraesCS1B02G225600	TraesCS1D02G215000	3.24302	4.44028	2.85641	4.44028	YES
1193	TraesCS1A02G212000	TraesCS1B02G225700	TraesCS1D02G215100	0.342946	0.519738	0.136823	0.519738	YES
1194	TraesCS1A02G212200	TraesCS1B02G225800	TraesCS1D02G215200	0.0273856	0.19075	0	0.19075	NO
1195	TraesCS1A02G212300	TraesCS1B02G225900	TraesCS1D02G215300	0.0431859	0.0692172	0.0471873	0.0692172	NO
1196	TraesCS1A02G212400	TraesCS1B02G226000	TraesCS1D02G215400	9.03102	3.55545	6.5244	9.03102	YES
1197	TraesCS1A02G212600	TraesCS1B02G226100	TraesCS1D02G215500	47.2651	63.931	72.5951	72.5951	YES
1198	TraesCS1A02G212700	TraesCS1B02G226200	TraesCS1D02G215600	0.0633179	1.05219	0.0259955	1.05219	YES
1199	TraesCS1A02G212800	TraesCS1B02G226300	TraesCS1D02G215700	6.82401	7.33277	7.21453	7.33277	YES
1200	TraesCS1A02G212900	TraesCS1B02G226400	TraesCS1D02G215800	2.8325	0.577647	2.70225	2.8325	YES
1201	TraesCS1A02G213000	TraesCS1B02G226500	TraesCS1D02G215900	16.0839	13.0763	10.9076	16.0839	YES
1202	TraesCS1A02G213100	TraesCS1B02G226600	TraesCS1D02G216000	20.7177	15.5183	21.1731	21.1731	YES
1203	TraesCS1A02G213300	TraesCS1B02G226700	TraesCS1D02G216100	5.39431	3.96112	7.56874	7.56874	YES
1204	TraesCS1A02G213400	TraesCS1B02G226800	TraesCS1D02G216200	28.9691	19.6646	18.2044	28.9691	YES
1205	TraesCS1A02G213600	TraesCS1B02G227100	TraesCS1D02G216400	8.46193	11.7978	7.31447	11.7978	YES
1206	TraesCS1A02G213700	TraesCS1B02G227300	TraesCS1D02G216500	0.0587196	0.625953	0.0190968	0.625953	YES
1207	TraesCS1A02G213800	TraesCS1B02G227600	TraesCS1D02G216600	0.545099	3.35776	2.7519	3.35776	YES
1208	TraesCS1A02G213900	TraesCS1B02G227700	TraesCS1D02G216700	12.4507	8.85561	10.5446	12.4507	YES
1209	TraesCS1A02G214100	TraesCS1B02G227900	TraesCS1D02G217000	1.45755	1.45954	1.07535	1.45954	YES
1210	TraesCS1A02G214200	TraesCS1B02G228000	TraesCS1D02G217100	2.1536	4.53543	2.76082	4.53543	YES
1211	TraesCS1A02G214300	TraesCS1B02G228100	TraesCS1D02G217200	0.932818	0.347152	1.09169	1.09169	YES
1212	TraesCS1A02G214316	TraesCS1B02G228200	TraesCS1D02G217300	0.421957	0.800777	0	0.800777	YES
1213	TraesCS1A02G214400	TraesCS1B02G228300	TraesCS1D02G217400	2.3331	1.14305	2.0318	2.3331	YES
1214	TraesCS1A02G214500	TraesCS1B02G228400	TraesCS1D02G217500	0	0.0386727	0	0.0386727	NO
1215	TraesCS1A02G214600	TraesCS1B02G228500	TraesCS1D02G217600	29.2671	39.7176	29.2915	39.7176	YES
1216	TraesCS1A02G215100	TraesCS1B02G228600	TraesCS1D02G217700	3.04616	2.1969	3.17524	3.17524	YES
1217	TraesCS1A02G215300	TraesCS1B02G228800	TraesCS1D02G217800	36.6619	20.8186	27.125	36.6619	YES
1218	TraesCS1A02G215400	TraesCS1B02G228900	TraesCS1D02G217900	3.67394	2.83741	1.96768	3.67394	YES
1219	TraesCS1A02G215500	TraesCS1B02G229000	TraesCS1D02G218000	31.7513	21.3554	27.1649	31.7513	YES
1220	TraesCS1A02G215600	TraesCS1B02G229100	TraesCS1D02G218100	9.25265	9.2518	9.26727	9.26727	YES
1221	TraesCS1A02G215900	TraesCS1B02G229400	TraesCS1D02G218200	0.50111	0.820879	0.737336	0.820879	YES
1222	TraesCS1A02G216300	TraesCS1B02G229500	TraesCS1D02G218500	16.7807	21.6138	16.0094	21.6138	YES
1223	TraesCS1A02G216800	TraesCS1B02G229800	TraesCS1D02G218600	14.1991	19.1287	12.8808	19.1287	YES
1224	TraesCS1A02G216900	TraesCS1B02G229900	TraesCS1D02G218700	23.9266	27.9075	23.331	27.9075	YES
1225	TraesCS1A02G217000	TraesCS1B02G230100	TraesCS1D02G218800	1.59413	5.21629	2.70614	5.21629	YES
1226	TraesCS1A02G217100	TraesCS1B02G230200	TraesCS1D02G218900	0.732525	0.638638	1.48044	1.48044	YES
1227	TraesCS1A02G217200	TraesCS1B02G230300	TraesCS1D02G219000	304.292	193.093	271.583	304.292	YES
1228	TraesCS1A02G217300	TraesCS1B02G230500	TraesCS1D02G219100	23.1841	24.9188	31.1009	31.1009	YES
1229	TraesCS1A02G217400	TraesCS1B02G230600	TraesCS1D02G219200	12.8505	9.78076	12.1088	12.8505	YES
1230	TraesCS1A02G217500	TraesCS1B02G230800	TraesCS1D02G219300	1.85034	2.5011	2.04144	2.5011	YES
1231	TraesCS1A02G217600	TraesCS1B02G230900	TraesCS1D02G219400	2.0916	2.42807	5.67677	5.67677	YES
1232	TraesCS1A02G217700	TraesCS1B02G231000	TraesCS1D02G219500	0.197653	0.0389387	0.261912	0.261912	NO
1233	TraesCS1A02G217900	TraesCS1B02G231300	TraesCS1D02G219600	9.50855	9.12366	7.47308	9.50855	YES
1234	TraesCS1A02G218000	TraesCS1B02G231400	TraesCS1D02G219700	12.0868	57.3995	24.2711	57.3995	YES
1235	TraesCS1A02G218200	TraesCS1B02G231600	TraesCS1D02G219800	5.11912	3.88764	5.11721	5.11912	YES
1236	TraesCS1A02G218300	TraesCS1B02G231800	TraesCS1D02G219900	6.79631	2.50433	3.31285	6.79631	YES
1237	TraesCS1A02G218400	TraesCS1B02G231900	TraesCS1D02G220000	2.01918	1.79451	0.787568	2.01918	YES
1238	TraesCS1A02G218500	TraesCS1B02G232000	TraesCS1D02G220100	6.39805	6.30451	5.24864	6.39805	YES
1239	TraesCS1A02G218600	TraesCS1B02G232100	TraesCS1D02G220300	1.35714	1.73202	1.79187	1.79187	YES
1240	TraesCS1A02G218700	TraesCS1B02G232200	TraesCS1D02G220400	14.1829	11.1306	12.8398	14.1829	YES
1241	TraesCS1A02G218900	TraesCS1B02G232400	TraesCS1D02G220600	20.1191	23.3661	21.4958	23.3661	YES
1242	TraesCS1A02G219000	TraesCS1B02G232500	TraesCS1D02G220700	0.627331	0.976147	0.610849	0.976147	YES
1243	TraesCS1A02G219400	TraesCS1B02G232800	TraesCS1D02G221000	8.3704	9.28571	8.3396	9.28571	YES
1244	TraesCS1A02G219500	TraesCS1B02G232900	TraesCS1D02G221100	0.0994483	0.358265	0.410589	0.410589	NO
1245	TraesCS1A02G219700	TraesCS1B02G233000	TraesCS1D02G221200	0.0536847	0	0	0.0536847	NO
1246	TraesCS1A02G219800	TraesCS1B02G233100	TraesCS1D02G221300	14.9528	12.6499	6.79041	14.9528	YES
1247	TraesCS1A02G219900	TraesCS1B02G233200	TraesCS1D02G221400	0.097072	0.766891	0.32842	0.766891	YES
1248	TraesCS1A02G220000	TraesCS1B02G233300	TraesCS1D02G221500	2.33992	1.24747	1.63904	2.33992	YES
1249	TraesCS1A02G220100	TraesCS1B02G233400	TraesCS1D02G221600	6.22908	5.62315	3.19622	6.22908	YES
1250	TraesCS1A02G220200	TraesCS1B02G233500	TraesCS1D02G221700	44.029	28.6063	31.8151	44.029	YES
1251	TraesCS1A02G220300	TraesCS1B02G233600	TraesCS1D02G221800	0.11193	0.286138	0.141911	0.286138	NO
1252	TraesCS1A02G221100	TraesCS1B02G234400	TraesCS1D02G222700	19.0667	17.546	16.2917	19.0667	YES
1253	TraesCS1A02G221300	TraesCS1B02G234600	TraesCS1D02G222900	1.56951	1.7828	1.65843	1.7828	YES
1254	TraesCS1A02G221400	TraesCS1B02G234700	TraesCS1D02G223000	0.0243674	0.163593	0.714835	0.714835	YES
1255	TraesCS1A02G221600	TraesCS1B02G234800	TraesCS1D02G223200	12.0161	12.7951	11.0018	12.7951	YES
1256	TraesCS1A02G221700	TraesCS1B02G234900	TraesCS1D02G223400	2.85446	1.49986	2.72464	2.85446	YES
1257	TraesCS1A02G221800	TraesCS1B02G235000	TraesCS1D02G223500	7.28553	8.73919	5.93356	8.73919	YES
1258	TraesCS1A02G221900	TraesCS1B02G235100	TraesCS1D02G223600	13.9048	11.1718	14.7136	14.7136	YES
1259	TraesCS1A02G222000	TraesCS1B02G235200	TraesCS1D02G223700	26.1545	23.5318	28.6487	28.6487	YES
1260	TraesCS1A02G222200	TraesCS1B02G235600	TraesCS1D02G223900	2.64765	1.39249	0.549504	2.64765	YES
1261	TraesCS1A02G222300	TraesCS1B02G235700	TraesCS1D02G224000	0	0	0	0	NO
1262	TraesCS1A02G222500	TraesCS1B02G235800	TraesCS1D02G224100	0.391172	0.412535	0.308989	0.412535	NO
1263	TraesCS1A02G222600	TraesCS1B02G235900	TraesCS1D02G224200	0.16187	0.494603	0.135291	0.494603	NO
1264	TraesCS1A02G222700	TraesCS1B02G236000	TraesCS1D02G224300	0.35715	0.119393	0.451968	0.451968	NO
1265	TraesCS1A02G222800	TraesCS1B02G236100	TraesCS1D02G224400	22.0367	36.1794	31.99	36.1794	YES
1266	TraesCS1A02G222900	TraesCS1B02G236200	TraesCS1D02G224500	7.05321	3.49666	3.73705	7.05321	YES
1267	TraesCS1A02G223000	TraesCS1B02G236300	TraesCS1D02G224600	8.73313	11.9737	8.07608	11.9737	YES
1268	TraesCS1A02G223100	TraesCS1B02G236400	TraesCS1D02G224700	1.60967	1.93244	0.841435	1.93244	YES
1269	TraesCS1A02G223200	TraesCS1B02G236500	TraesCS1D02G224800	9.15761	4.03152	5.92537	9.15761	YES
1270	TraesCS1A02G223300	TraesCS1B02G236600	TraesCS1D02G224900	3.61465	2.10492	3.94096	3.94096	YES
1271	TraesCS1A02G223400	TraesCS1B02G236700	TraesCS1D02G225000	0	0	0	0	NO
1272	TraesCS1A02G223500	TraesCS1B02G236800	TraesCS1D02G225100	0	0	0	0	NO
1273	TraesCS1A02G223600	TraesCS1B02G236900	TraesCS1D02G225200	5.14111	9.16632	4.38582	9.16632	YES
1274	TraesCS1A02G223700	TraesCS1B02G237000	TraesCS1D02G225300	9.58951	7.43854	7.01219	9.58951	YES
1275	TraesCS1A02G223800	TraesCS1B02G237100	TraesCS1D02G225400	62.0937	61.4713	52.8758	62.0937	YES
1276	TraesCS1A02G223900	TraesCS1B02G237200	TraesCS1D02G225500	12.4209	9.04562	4.99286	12.4209	YES
1277	TraesCS1A02G224000	TraesCS1B02G237300	TraesCS1D02G225600	108.542	109.244	99.7647	109.244	YES
1278	TraesCS1A02G224600	TraesCS1B02G237600	TraesCS1D02G226000	0.914468	0.920736	0.802967	0.920736	YES
1279	TraesCS1A02G224700	TraesCS1B02G237700	TraesCS1D02G226100	16.373	19.7599	16.5185	19.7599	YES
1280	TraesCS1A02G224800	TraesCS1B02G238000	TraesCS1D02G226200	31.4632	40.7021	30.4806	40.7021	YES
1281	TraesCS1A02G224900	TraesCS1B02G238100	TraesCS1D02G226300	1.19562	0.902705	0.00163047	1.19562	YES
1282	TraesCS1A02G225100	TraesCS1B02G238300	TraesCS1D02G226500	2.7399	1.84139	3.3171	3.3171	YES
1283	TraesCS1A02G225200	TraesCS1B02G238600	TraesCS1D02G226600	9.39863	5.65778	8.72472	9.39863	YES
1284	TraesCS1A02G225300	TraesCS1B02G238700	TraesCS1D02G226700	0.610989	0.657328	0.47255	0.657328	YES
1285	TraesCS1A02G225600	TraesCS1B02G239000	TraesCS1D02G226800	4.60966	2.90815	3.85069	4.60966	YES
1286	TraesCS1A02G225700	TraesCS1B02G238900	TraesCS1D02G226900	0.589129	0.780093	0.389002	0.780093	YES
1287	TraesCS1A02G225800	TraesCS1B02G239200	TraesCS1D02G227000	0	0	0	0	NO
1288	TraesCS1A02G226000	TraesCS1B02G240100	TraesCS1D02G227400	0.0647312	0	0.0254197	0.0647312	NO
1289	TraesCS1A02G226100	TraesCS1B02G240200	TraesCS1D02G227500	2.28774	1.37082	0.736521	2.28774	YES
1290	TraesCS1A02G226200	TraesCS1B02G240300	TraesCS1D02G227600	0.331865	0.125971	0.328891	0.331865	NO
1291	TraesCS1A02G226300	TraesCS1B02G240400	TraesCS1D02G227700	15.0998	8.80691	9.74977	15.0998	YES
1292	TraesCS1A02G226500	TraesCS1B02G240500	TraesCS1D02G227900	7.79439	8.70957	10.9371	10.9371	YES
1293	TraesCS1A02G226600	TraesCS1B02G240600	TraesCS1D02G228000	5.7033	9.31713	13.4712	13.4712	YES
1294	TraesCS1A02G226700	TraesCS1B02G240700	TraesCS1D02G228100	0.188899	0.706994	0.342816	0.706994	YES
1295	TraesCS1A02G226800	TraesCS1B02G240800	TraesCS1D02G228200	0	0	0	0	NO
1296	TraesCS1A02G226900	TraesCS1B02G240900	TraesCS1D02G228400	3.54958	2.89381	2.87087	3.54958	YES
1297	TraesCS1A02G227000	TraesCS1B02G241100	TraesCS1D02G228600	8.33388	7.90841	11.4921	11.4921	YES
1298	TraesCS1A02G227100	TraesCS1B02G241200	TraesCS1D02G228700	0.101246	0.128635	0.278735	0.278735	NO
1299	TraesCS1A02G227200	TraesCS1B02G241300	TraesCS1D02G228800	20.6018	17.8606	16.6325	20.6018	YES
1300	TraesCS1A02G227300	TraesCS1B02G241400	TraesCS1D02G228900	14.5278	13.5401	15.3504	15.3504	YES
1301	TraesCS1A02G227600	TraesCS1B02G241900	TraesCS1D02G229300	7.29255	5.93318	7.14799	7.29255	YES
1302	TraesCS1A02G227700	TraesCS1B02G242000	TraesCS1D02G229400	14.9095	16.0373	16.9586	16.9586	YES
1303	TraesCS1A02G228000	TraesCS1B02G242200	TraesCS1D02G229600	0.344222	0.399352	0.391056	0.399352	NO
1304	TraesCS1A02G228100	TraesCS1B02G242300	TraesCS1D02G229700	0.311803	1.09669	0.545762	1.09669	YES
1305	TraesCS1A02G228300	TraesCS1B02G242500	TraesCS1D02G230100	5.04964	3.4058	5.25461	5.25461	YES
1306	TraesCS1A02G228400	TraesCS1B02G242600	TraesCS1D02G230200	1.20496	4.65145	1.99622	4.65145	YES
1307	TraesCS1A02G228500	TraesCS1B02G242700	TraesCS1D02G230300	0.0803086	0.777425	0.441054	0.777425	YES
1308	TraesCS1A02G228900	TraesCS1B02G245100	TraesCS1D02G233100	21.7054	16.2152	16.5451	21.7054	YES
1309	TraesCS1A02G229000	TraesCS1B02G245000	TraesCS3D02G150300	302.754	87.7691	471.317	471.317	YES
1310	TraesCS1A02G229300	TraesCS1B02G244800	TraesCS1D02G232700	0.0260876	0.0644961	0.12719	0.12719	NO
1311	TraesCS1A02G229400	TraesCS1B02G244700	TraesCS1D02G232600	3.27024	1.63093	2.25564	3.27024	YES
1312	TraesCS1A02G229600	TraesCS1B02G244500	TraesCS1D02G232400	4.79725	4.10848	2.92043	4.79725	YES
1313	TraesCS1A02G229700	TraesCS1B02G244400	TraesCS1D02G232300	14.6316	17.4165	20.9893	20.9893	YES
1314	TraesCS1A02G229800	TraesCS1B02G244300	TraesCS1D02G232200	1.15249	2.08332	1.67769	2.08332	YES
1315	TraesCS1A02G229900	TraesCS1B02G244200	TraesCS1D02G232100	7.91782	13.3066	12.0211	13.3066	YES
1316	TraesCS1A02G230000	TraesCS1B02G244100	TraesCS1D02G232000	4.80283	3.04195	3.80188	4.80283	YES
1317	TraesCS1A02G230100	TraesCS1B02G244000	TraesCS1D02G231800	28.8799	32.774	46.588	46.588	YES
1318	TraesCS1A02G230300	TraesCS1B02G243900	TraesCS1D02G231700	5.53919	4.60278	3.89249	5.53919	YES
1319	TraesCS1A02G230400	TraesCS1B02G243800	TraesCS1D02G231600	36.2766	39.7057	43.0471	43.0471	YES
1320	TraesCS1A02G230500	TraesCS1B02G243700	TraesCS1D02G231500	0.0452966	0.077938	0.130396	0.130396	NO
1321	TraesCS1A02G230800	TraesCS1B02G243600	TraesCS1D02G231400	0	0	0	0	NO
1322	TraesCS1A02G230900	TraesCS1B02G243500	TraesCS1D02G231300	0.503206	1.35266	0.633973	1.35266	YES
1323	TraesCS1A02G231000	TraesCS1B02G243400	TraesCS1D02G231200	43.6229	23.9517	26.7814	43.6229	YES
1324	TraesCS1A02G231200	TraesCS1B02G243200	TraesCS1D02G230900	12.9342	5.22691	3.02112	12.9342	YES
1325	TraesCS1A02G231500	TraesCS1B02G243000	TraesCS1D02G230800	0.0765233	0.0443349	0.101083	0.101083	NO
1326	TraesCS1A02G231600	TraesCS1B02G242900	TraesCS1D02G230700	0.0751793	0	0	0.0751793	NO
1327	TraesCS1A02G231700	TraesCS1B02G242800	TraesCS1D02G230600	0.0640358	0.0997655	0.182045	0.182045	NO
1328	TraesCS1A02G232000	TraesCS1B02G245400	TraesCS1D02G233400	4.00375	1.99458	2.8027	4.00375	YES
1329	TraesCS1A02G232200	TraesCS1B02G245500	TraesCS1D02G233500	0.501999	0.794031	0.764412	0.794031	YES
1330	TraesCS1A02G232300	TraesCS1B02G245600	TraesCS1D02G233600	0.0761579	0.740935	1.74648	1.74648	YES
1331	TraesCS1A02G232500	TraesCS1B02G245700	TraesCS1D02G233800	0.0842667	0.373245	0.746526	0.746526	YES
1332	TraesCS1A02G232600	TraesCS1B02G245800	TraesCS1D02G233900	0.213545	0.681779	0.619372	0.681779	YES
1333	TraesCS1A02G232800	TraesCS1B02G245900	TraesCS1D02G234000	5.96323	13.9116	20.6534	20.6534	YES
1334	TraesCS1A02G233200	TraesCS1B02G249800	TraesCS1D02G238300	33.4483	29.4177	46.3943	46.3943	YES
1335	TraesCS1A02G233300	TraesCS1B02G249900	TraesCS1D02G238400	0.517904	0.474965	0.659337	0.659337	YES
1336	TraesCS1A02G233400	TraesCS1B02G250000	TraesCS1D02G238500	10.5134	6.24362	8.414	10.5134	YES
1337	TraesCS1A02G233500	TraesCS1B02G250100	TraesCS1D02G238600	4.71683	5.1238	4.75404	5.1238	YES
1338	TraesCS1A02G233600	TraesCS1B02G250300	TraesCS1D02G238700	10.4211	7.77763	11.0894	11.0894	YES
1339	TraesCS1A02G233700	TraesCS1B02G249700	TraesCS1D02G238200	91.9226	42.3855	75.0547	91.9226	YES
1340	TraesCS1A02G233800	TraesCS1B02G249600	TraesCS1D02G238100	0.968702	0.473403	0.886202	0.968702	YES
1341	TraesCS1A02G234100	TraesCS1B02G249400	TraesCS1D02G237900	6.06454	5.40809	7.08921	7.08921	YES
1342	TraesCS1A02G234200	TraesCS1B02G249300	TraesCS1D02G237800	17.0992	17.8654	17.5009	17.8654	YES
1343	TraesCS1A02G234300	TraesCS1B02G249200	TraesCS1D02G237700	0.226601	0.191692	0.0303937	0.226601	NO
1344	TraesCS1A02G234400	TraesCS1B02G249100	TraesCS1D02G237600	1.1959	0.465512	1.33145	1.33145	YES
1345	TraesCS1A02G234500	TraesCS3B02G573200	TraesCS4D02G157400	1.97691	0.476392	5.26331	5.26331	YES
1346	TraesCS1A02G234600	TraesCS1B02G249000	TraesCS1D02G237500	0.0421663	0.0478194	0.147902	0.147902	NO
1347	TraesCS1A02G234700	TraesCS1B02G248900	TraesCS1D02G237400	0.0679868	0.137216	0.246454	0.246454	NO
1348	TraesCS1A02G234800	TraesCS1B02G248700	TraesCS1D02G237200	0.127879	0.051497	0.175412	0.175412	NO
1349	TraesCS1A02G234900	TraesCS1B02G248800	TraesCS1D02G237300	6.36298	5.62329	6.89529	6.89529	YES
1350	TraesCS1A02G235000	TraesCS1B02G248600	TraesCS1D02G237100	0.12405	0.560278	0.397162	0.560278	YES
1351	TraesCS1A02G235100	TraesCS1B02G248300	TraesCS1D02G236800	0.206135	0.704965	1.01791	1.01791	YES
1352	TraesCS1A02G235200	TraesCS1B02G248400	TraesCS1D02G236900	0.73225	0.134671	0.3356	0.73225	YES
1353	TraesCS1A02G235300	TraesCS1B02G248500	TraesCS1D02G237000	1.88014	8.37914	12.1102	12.1102	YES
1354	TraesCS1A02G235500	TraesCS1B02G248200	TraesCS1D02G236700	5.54444	7.45771	6.32661	7.45771	YES
1355	TraesCS1A02G235600	TraesCS2B02G321200	TraesCS2D02G303100	84.7404	51.8168	84.1963	84.7404	YES
1356	TraesCS1A02G235900	TraesCS1B02G247900	TraesCS1D02G236400	9.06962	8.42766	9.28782	9.28782	YES
1357	TraesCS1A02G236000	TraesCS1B02G247800	TraesCS1D02G236300	11.3773	8.57197	8.62678	11.3773	YES
1358	TraesCS1A02G236100	TraesCS1B02G247700	TraesCS1D02G236200	17.7645	6.8074	15.1631	17.7645	YES
1359	TraesCS1A02G236400	TraesCS1B02G247300	TraesCS1D02G236000	0.921289	3.06653	1.09164	3.06653	YES
1360	TraesCS1A02G236500	TraesCS1B02G247200	TraesCS1D02G235900	3.48025	4.06245	3.18704	4.06245	YES
1361	TraesCS1A02G236600	TraesCS1B02G247100	TraesCS1D02G235800	6.76947	6.64982	8.27657	8.27657	YES
1362	TraesCS1A02G236700	TraesCS1B02G247000	TraesCS1D02G235700	12.0293	24.5875	24.7226	24.7226	YES
1363	TraesCS1A02G236900	TraesCS1B02G246900	TraesCS1D02G235500	6.94986	5.1653	4.82188	6.94986	YES
1364	TraesCS1A02G237000	TraesCS1B02G246800	TraesCS1D02G235400	10.518	7.54608	2.15682	10.518	YES
1365	TraesCS1A02G237200	TraesCS1B02G246700	TraesCS1D02G235200	3.01567	3.68898	2.27473	3.68898	YES
1366	TraesCS1A02G237900	TraesCS1B02G246400	TraesCS1D02G234700	0.174933	0.0282636	0.0865096	0.174933	NO
1367	TraesCS1A02G238000	TraesCS1B02G246500	TraesCS1D02G234800	0.668946	0.452603	0.46904	0.668946	YES
1368	TraesCS1A02G238100	TraesCS1B02G246600	TraesCS1D02G235100	0.0731504	0.0819467	10.493	10.493	YES
1369	TraesCS1A02G238400	TraesCS4B02G161400	TraesCS7D02G366100	3.08397	2.48455	2.05416	3.08397	YES
1370	TraesCS1A02G238800	TraesCS1B02G250900	TraesCS1D02G239000	12.6075	6.79827	20.2081	20.2081	YES
1371	TraesCS1A02G238900	TraesCS1B02G251000	TraesCS1D02G239100	7.07364	13.2007	4.94531	13.2007	YES
1372	TraesCS1A02G239000	TraesCS1B02G251200	TraesCS1D02G239200	2.90603	2.61418	2.71749	2.90603	YES
1373	TraesCS1A02G239100	TraesCS1B02G251300	TraesCS1D02G239300	7.71028	5.98259	6.33924	7.71028	YES
1374	TraesCS1A02G239400	TraesCS1B02G251600	TraesCS1D02G239600	0.0506662	0.0213529	0.0377224	0.0506662	NO
1375	TraesCS1A02G239600	TraesCS1B02G251800	TraesCS1D02G239800	1.1842	2.31721	1.62628	2.31721	YES
1376	TraesCS1A02G239700	TraesCS1B02G251900	TraesCS1D02G239900	1.68722	0.405449	2.17726	2.17726	YES
1377	TraesCS1A02G239800	TraesCS1B02G252000	TraesCS1D02G240000	40.694	37.7174	37.2557	40.694	YES
1378	TraesCS1A02G240000	TraesCS1B02G252100	TraesCS1D02G240100	5.20275	5.34325	5.56169	5.56169	YES
1379	TraesCS1A02G240100	TraesCS1B02G252200	TraesCS1D02G240200	1.41488	0.872987	1.1823	1.41488	YES
1380	TraesCS1A02G240200	TraesCS1B02G252300	TraesCS1D02G240300	6.37665	1.51785	1.30693	6.37665	YES
1381	TraesCS1A02G240300	TraesCS1B02G252400	TraesCS1D02G240400	7.03279	6.29765	7.19789	7.19789	YES
1382	TraesCS1A02G240500	TraesCS1B02G252600	TraesCS1D02G240600	0.339296	1.54405	3.14891	3.14891	YES
1383	TraesCS1A02G240600	TraesCS1B02G252700	TraesCS1D02G240700	9.1075	8.78881	11.7354	11.7354	YES
1384	TraesCS1A02G241000	TraesCS1B02G252900	TraesCS1D02G241000	6.62244	3.99157	7.89414	7.89414	YES
1385	TraesCS1A02G241100	TraesCS1B02G253000	TraesCS1D02G241100	0.13128	0.141781	0.355806	0.355806	NO
1386	TraesCS1A02G241300	TraesCS1B02G253100	TraesCS1D02G241200	15.4836	11.6145	15.4338	15.4836	YES
1387	TraesCS1A02G241400	TraesCS1B02G253200	TraesCS1D02G241300	3.63278	4.43965	2.8963	4.43965	YES
1388	TraesCS1A02G241500	TraesCS1B02G253300	TraesCS1D02G241400	3.81758	7.19929	66.7342	66.7342	YES
1389	TraesCS1A02G241700	TraesCS1B02G253400	TraesCS1D02G241600	4.115	5.35069	3.15269	5.35069	YES
1390	TraesCS1A02G241900	TraesCS1B02G253500	TraesCS1D02G241800	10.655	16.0345	15.4832	16.0345	YES
1391	TraesCS1A02G242000	TraesCS1B02G253600	TraesCS1D02G241900	0.0643662	0.0330182	0.0177534	0.0643662	NO
1392	TraesCS1A02G242200	TraesCS1B02G253700	TraesCS1D02G242100	1.09112	1.73627	3.00061	3.00061	YES
1393	TraesCS1A02G242400	TraesCS1B02G253800	TraesCS1D02G242300	1.16143	0.0658682	0.559732	1.16143	YES
1394	TraesCS1A02G242500	TraesCS1B02G253900	TraesCS1D02G242400	96.4267	233.665	207.686	233.665	YES
1395	TraesCS1A02G242600	TraesCS1B02G254100	TraesCS1D02G242600	18.1239	21.2373	14.5931	21.2373	YES
1396	TraesCS1A02G242700	TraesCS1B02G254200	TraesCS1D02G242700	0.325976	0	0	0.325976	NO
1397	TraesCS1A02G242800	TraesCS1B02G254300	TraesCS1D02G242800	3.69099	5.22181	6.42085	6.42085	YES
1398	TraesCS1A02G242900	TraesCS1B02G254400	TraesCS1D02G242900	29.3295	41.1591	46.7229	46.7229	YES
1399	TraesCS1A02G243000	TraesCS1B02G254500	TraesCS1D02G243000	4.2908	2.29318	2.04115	4.2908	YES
1400	TraesCS1A02G243100	TraesCS1B02G254600	TraesCS1D02G243100	6.50923	6.08604	5.39203	6.50923	YES
1401	TraesCS1A02G243200	TraesCS1B02G254700	TraesCS1D02G243200	8.98564	9.23986	7.68326	9.23986	YES
1402	TraesCS1A02G243300	TraesCS1B02G254800	TraesCS1D02G243300	23.9844	28.624	19.2859	28.624	YES
1403	TraesCS1A02G243400	TraesCS1B02G254900	TraesCS1D02G243400	0.827247	0.508604	0.247962	0.827247	YES
1404	TraesCS1A02G243500	TraesCS1B02G255000	TraesCS1D02G243500	0.0693745	0.0522739	0.987065	0.987065	YES
1405	TraesCS1A02G243700	TraesCS1B02G255100	TraesCS1D02G243700	2.58612	2.56638	2.17448	2.58612	YES
1406	TraesCS1A02G243800	TraesCS1B02G255200	TraesCS1D02G243800	0.0348945	0	0	0.0348945	NO
1407	TraesCS1A02G244100	TraesCS1B02G255500	TraesCS1D02G244000	3.30042	0.520858	3.37322	3.37322	YES
1408	TraesCS1A02G244200	TraesCS1B02G255600	TraesCS1D02G244100	0.388645	0.896805	1.04197	1.04197	YES
1409	TraesCS1A02G244300	TraesCS1B02G255700	TraesCS1D02G244200	15.8708	11.6725	13.9438	15.8708	YES
1410	TraesCS1A02G244700	TraesCS1B02G255900	TraesCS1D02G244400	6.00851	5.97139	6.7374	6.7374	YES
1411	TraesCS1A02G244800	TraesCS1B02G256000	TraesCS1D02G244500	0.0182093	0.0576211	0.0501683	0.0576211	NO
1412	TraesCS1A02G244900	TraesCS1B02G256100	TraesCS1D02G244700	10.6279	8.47255	6.03699	10.6279	YES
1413	TraesCS1A02G245000	TraesCS1B02G256200	TraesCS1D02G244900	6.79608	8.51292	7.332	8.51292	YES
1414	TraesCS1A02G245300	TraesCS1B02G256300	TraesCS1D02G245000	12.581	8.29205	6.75936	12.581	YES
1415	TraesCS1A02G245400	TraesCS1B02G256400	TraesCS1D02G245100	0.0561288	0.0572663	0.0222562	0.0572663	NO
1416	TraesCS1A02G245500	TraesCS1B02G256500	TraesCS1D02G245200	3.69786	4.85333	5.17819	5.17819	YES
1417	TraesCS1A02G245600	TraesCS1B02G256600	TraesCS1D02G245300	10.6072	8.82669	9.74092	10.6072	YES
1418	TraesCS1A02G245700	TraesCS1B02G256700	TraesCS1D02G245400	1.18981	1.37185	1.10838	1.37185	YES
1419	TraesCS1A02G246300	TraesCS1B02G257000	TraesCS1D02G245600	2.05314	0.254529	0.414793	2.05314	YES
1420	TraesCS1A02G246400	TraesCS1B02G257100	TraesCS1D02G245700	12.4483	9.25159	11.5703	12.4483	YES
1421	TraesCS1A02G246500	TraesCS1B02G257200	TraesCS1D02G245800	2.93014	3.95991	4.77558	4.77558	YES
1422	TraesCS1A02G246600	TraesCS1B02G257300	TraesCS1D02G245900	86.3649	40.8817	45.2662	86.3649	YES
1423	TraesCS1A02G246800	TraesCS1B02G257400	TraesCS1D02G246100	5.54194	5.98687	5.32627	5.98687	YES
1424	TraesCS1A02G246900	TraesCS1B02G257500	TraesCS1D02G246200	55.4449	55.7487	51.1068	55.7487	YES
1425	TraesCS1A02G247100	TraesCS1B02G257700	TraesCS1D02G246300	5.82467	4.0184	8.10543	8.10543	YES
1426	TraesCS1A02G247200	TraesCS1B02G257800	TraesCS1D02G246400	6.01043	3.39155	6.2018	6.2018	YES
1427	TraesCS1A02G247300	TraesCS1B02G257900	TraesCS1D02G246500	0.301756	0.129652	0.044477	0.301756	NO
1428	TraesCS1A02G247400	TraesCS1B02G258000	TraesCS1D02G246600	0.893156	0.639108	0.883396	0.893156	YES
1429	TraesCS1A02G247500	TraesCS1B02G258100	TraesCS1D02G246700	20.754	14.2859	11.65	20.754	YES
1430	TraesCS1A02G247800	TraesCS1B02G258200	TraesCS1D02G247200	5.35291	2.72715	0	5.35291	YES
1431	TraesCS1A02G247900	TraesCS1B02G258300	TraesCS1D02G247300	13.6488	12.9861	15.8632	15.8632	YES
1432	TraesCS1A02G248000	TraesCS1B02G258400	TraesCS1D02G247400	0.473011	0.946022	0.787484	0.946022	YES
1433	TraesCS1A02G248100	TraesCS1B02G258600	TraesCS1D02G247500	8.15152	8.34905	10.6102	10.6102	YES
1434	TraesCS1A02G248200	TraesCS1B02G258700	TraesCS1D02G247600	8.97052	9.31651	9.01311	9.31651	YES
1435	TraesCS1A02G248300	TraesCS1B02G258800	TraesCS1D02G247700	1.59894	0.687168	0.777548	1.59894	YES
1436	TraesCS1A02G248400	TraesCS1B02G259000	TraesCS1D02G247800	26.9003	50.5694	55.4779	55.4779	YES
1437	TraesCS1A02G248500	TraesCS1B02G259200	TraesCS1D02G248000	0	0	0.0134806	0.0134806	NO
1438	TraesCS1A02G248600	TraesCS1B02G259300	TraesCS1D02G248100	2.62982	2.57402	2.43015	2.62982	YES
1439	TraesCS1A02G248700	TraesCS1B02G259400	TraesCS1D02G248200	0.190042	0.0400331	0.243846	0.243846	NO
1440	TraesCS1A02G248900	TraesCS1B02G259600	TraesCS1D02G248400	0.718941	4.71817	1.15035	4.71817	YES
1441	TraesCS1A02G249000	TraesCS1B02G259700	TraesCS1D02G248500	0.788666	1.75076	6.99976	6.99976	YES
1442	TraesCS1A02G249100	TraesCS1B02G259800	TraesCS1D02G248600	26.1349	24.3412	27.8517	27.8517	YES
1443	TraesCS1A02G249200	TraesCS1B02G259900	TraesCS1D02G248700	0	0.423706	0.417932	0.423706	NO
1444	TraesCS1A02G249300	TraesCS1B02G260000	TraesCS1D02G248800	7.92374	4.29003	9.28397	9.28397	YES
1445	TraesCS1A02G249400	TraesCS1B02G260100	TraesCS1D02G248900	17.8969	13.2965	17.0944	17.8969	YES
1446	TraesCS1A02G249500	TraesCS1B02G260300	TraesCS1D02G249000	2.9116	3.50382	3.94079	3.94079	YES
1447	TraesCS1A02G249600	TraesCS1B02G260400	TraesCS1D02G249100	50.6514	43.6849	52.4534	52.4534	YES
1448	TraesCS1A02G249800	TraesCS1B02G260500	TraesCS1D02G249300	0.140127	0.379971	0.235193	0.379971	NO
1449	TraesCS1A02G250100	TraesCS1B02G260800	TraesCS1D02G249700	2.57006	0.650078	6.9818	6.9818	YES
1450	TraesCS1A02G250300	TraesCS1B02G260900	TraesCS1D02G249900	93.1311	129.151	118.806	129.151	YES
1451	TraesCS1A02G250400	TraesCS1B02G261000	TraesCS1D02G250000	10.9547	3.96826	7.98258	10.9547	YES
1452	TraesCS1A02G250500	TraesCS1B02G261100	TraesCS1D02G250100	0.84849	0.745765	1.08834	1.08834	YES
1453	TraesCS1A02G250600	TraesCS1B02G261200	TraesCS1D02G250200	0	0.0185914	0.0919761	0.0919761	NO
1454	TraesCS1A02G250700	TraesCS1B02G261300	TraesCS1D02G250300	34.9944	29.5531	73.7491	73.7491	YES
1455	TraesCS1A02G250800	TraesCS1B02G261400	TraesCS1D02G250400	4.30081	3.83233	2.44529	4.30081	YES
1456	TraesCS1A02G250900	TraesCS1B02G261500	TraesCS1D02G250500	25.8053	23.9677	27.7975	27.7975	YES
1457	TraesCS1A02G251000	TraesCS1B02G261600	TraesCS1D02G250600	12.3817	10.3624	7.47213	12.3817	YES
1458	TraesCS1A02G251100	TraesCS1B02G261700	TraesCS1D02G250700	3.44677	4.03216	8.92404	8.92404	YES
1459	TraesCS1A02G251400	TraesCS1B02G262000	TraesCS1D02G250900	3.4393	2.18983	3.10656	3.4393	YES
1460	TraesCS1A02G251500	TraesCS1B02G262100	TraesCS1D02G251000	5.7287	4.79953	7.06251	7.06251	YES
1461	TraesCS1A02G251600	TraesCS1B02G262200	TraesCS1D02G251100	58.8037	60.298	66.2558	66.2558	YES
1462	TraesCS1A02G251700	TraesCS1B02G262600	TraesCS1D02G251500	16.6695	22.9057	14.0483	22.9057	YES
1463	TraesCS1A02G251800	TraesCS1B02G263300	TraesCS1D02G251800	2.05741	0.803226	1.50473	2.05741	YES
1464	TraesCS1A02G251900	TraesCS1B02G263100	TraesCS1D02G251700	0.386384	0.869952	1.00913	1.00913	YES
1465	TraesCS1A02G252000	TraesCS1B02G263000	TraesCS1D02G251600	7.10526	5.57276	4.78549	7.10526	YES
1466	TraesCS1A02G252200	TraesCS1B02G265800	TraesCS1D02G251900	0	0	0.280916	0.280916	NO
1467	TraesCS1A02G252400	TraesCS1B02G265600	TraesCS1D02G252100	6.69967	5.42185	10.928	10.928	YES
1468	TraesCS1A02G252500	TraesCS1B02G265500	TraesCS1D02G252200	5.14558	6.46104	10.2527	10.2527	YES
1469	TraesCS1A02G252600	TraesCS1B02G265400	TraesCS1D02G252300	1.96256	3.80318	0.268056	3.80318	YES
1470	TraesCS1A02G252700	TraesCS1B02G265300	TraesCS1D02G252400	2.56075	3.19527	2.35093	3.19527	YES
1471	TraesCS1A02G253000	TraesCS1B02G265200	TraesCS1D02G252500	23.4604	21.2049	23.0801	23.4604	YES
1472	TraesCS1A02G253500	TraesCS1B02G264700	TraesCS1D02G253000	0.0687561	0.263072	0.0470752	0.263072	NO
1473	TraesCS1A02G253600	TraesCS1B02G264600	TraesCS1D02G253200	0.103528	0.0916708	0.0618886	0.103528	NO
1474	TraesCS1A02G253700	TraesCS1B02G264500	TraesCS1D02G253300	0.10897	0.16956	0	0.16956	NO
1475	TraesCS1A02G253900	TraesCS1B02G264400	TraesCS1D02G253400	1.81388	2.0196	1.72745	2.0196	YES
1476	TraesCS1A02G254000	TraesCS1B02G264300	TraesCS1D02G253500	0.27792	0.724944	0.0197588	0.724944	YES
1477	TraesCS1A02G254100	TraesCS1B02G264200	TraesCS1D02G253600	1.49221	1.92475	1.36232	1.92475	YES
1478	TraesCS1A02G254200	TraesCS1B02G264000	TraesCS1D02G253700	6.04517	4.53822	6.40246	6.40246	YES
1479	TraesCS1A02G254400	TraesCS1B02G263900	TraesCS1D02G253800	3.17125	2.59319	5.77884	5.77884	YES
1480	TraesCS1A02G254500	TraesCS1B02G263700	TraesCS1D02G254000	0.0223298	0.875236	1.09557	1.09557	YES
1481	TraesCS1A02G254600	TraesCS1B02G263600	TraesCS1D02G254100	0.437375	0.845096	0.344582	0.845096	YES
1482	TraesCS1A02G254800	TraesCS1B02G263500	TraesCS1D02G254200	5.3881	6.38336	8.24031	8.24031	YES
1483	TraesCS1A02G255000	TraesCS1B02G263400	TraesCS1D02G254400	0.432969	1.04772	0.238885	1.04772	YES
1484	TraesCS1A02G255100	TraesCS1B02G265900	TraesCS1D02G254500	10.6016	7.23389	10.0653	10.6016	YES
1485	TraesCS1A02G255200	TraesCS1B02G266000	TraesCS1D02G254600	2.00574	1.6473	1.90591	2.00574	YES
1486	TraesCS1A02G255300	TraesCS1B02G266100	TraesCS1D02G254700	3.41135	6.0047	7.22645	7.22645	YES
1487	TraesCS1A02G255400	TraesCS1B02G266200	TraesCS1D02G254800	44.8767	17.5323	26.663	44.8767	YES
1488	TraesCS1A02G255600	TraesCS1B02G266300	TraesCS1D02G254900	0.40445	0.0958346	0.23644	0.40445	NO
1489	TraesCS1A02G255700	TraesCS1B02G266400	TraesCS1D02G255000	0	0	0.342754	0.342754	NO
1490	TraesCS1A02G255800	TraesCS1B02G266500	TraesCS1D02G255100	4.63328	7.35089	6.09914	7.35089	YES
1491	TraesCS1A02G255900	TraesCS1B02G266600	TraesCS1D02G255200	8.62373	8.54148	7.95219	8.62373	YES
1492	TraesCS1A02G256000	TraesCS1B02G266700	TraesCS1D02G255300	0.606967	0.734477	0.782873	0.782873	YES
1493	TraesCS1A02G256100	TraesCS1B02G266800	TraesCS1D02G255500	2.11901	0.506168	1.34133	2.11901	YES
1494	TraesCS1A02G256200	TraesCS1B02G266900	TraesCS1D02G255600	5.13678	6.59049	5.14838	6.59049	YES
1495	TraesCS1A02G256300	TraesCS1B02G267000	TraesCS1D02G255700	22.2192	24.9381	25.6767	25.6767	YES
1496	TraesCS1A02G256400	TraesCS1B02G267100	TraesCS1D02G255800	14.9966	17.3249	8.15474	17.3249	YES
1497	TraesCS1A02G256500	TraesCS1B02G267400	TraesCS1D02G256200	0.584164	0.18424	2.95004	2.95004	YES
1498	TraesCS1A02G256700	TraesCS1B02G267300	TraesCS1D02G256100	0.0505696	0.223346	0.142333	0.223346	NO
1499	TraesCS1A02G256800	TraesCS1B02G267200	TraesCS1D02G256000	53.4949	16.1784	24.1151	53.4949	YES
1500	TraesCS1A02G256900	TraesCS1B02G267500	TraesCS1D02G256300	0.670443	0.646983	0.6992	0.6992	YES
1501	TraesCS1A02G257000	TraesCS1B02G267600	TraesCS1D02G256400	0.220212	0.144127	0.622275	0.622275	YES
1502	TraesCS1A02G257200	TraesCS1B02G267700	TraesCS1D02G256500	2.14208	2.30236	0.584946	2.30236	YES
1503	TraesCS1A02G257300	TraesCS1B02G267800	TraesCS1D02G256600	5.04329	4.98739	8.26462	8.26462	YES
1504	TraesCS1A02G257400	TraesCS1B02G267900	TraesCS1D02G256700	3.09735	1.20386	2.17514	3.09735	YES
1505	TraesCS1A02G257500	TraesCS1B02G268000	TraesCS1D02G256800	0.271447	0.226888	0.600473	0.600473	YES
1506	TraesCS1A02G257700	TraesCS1B02G268100	TraesCS1D02G257000	0	0.0478302	0.0765666	0.0765666	NO
1507	TraesCS1A02G257800	TraesCS1B02G268200	TraesCS1D02G257100	0.0135084	0.0144197	0.010746	0.0144197	NO
1508	TraesCS1A02G257900	TraesCS1B02G268300	TraesCS1D02G257200	0.0899712	0.0166763	0.0938787	0.0938787	NO
1509	TraesCS1A02G258000	TraesCS1B02G268400	TraesCS1D02G257300	1.90379	1.88686	1.78415	1.90379	YES
1510	TraesCS1A02G258100	TraesCS1B02G268500	TraesCS1D02G257400	11.2869	13.3014	13.7925	13.7925	YES
1511	TraesCS1A02G258200	TraesCS1B02G268700	TraesCS1D02G257500	27.7274	26.9594	26.0498	27.7274	YES
1512	TraesCS1A02G258300	TraesCS1B02G268800	TraesCS1D02G257600	0.196692	0.0720774	0.107061	0.196692	NO
1513	TraesCS1A02G258400	TraesCS1B02G268900	TraesCS1D02G257700	6.87781	1.49044	0	6.87781	YES
1514	TraesCS1A02G258500	TraesCS1B02G269100	TraesCS1D02G257800	33.1819	32.0868	17.0714	33.1819	YES
1515	TraesCS1A02G258700	TraesCS1B02G269200	TraesCS1D02G258000	1.80209	2.70224	4.25346	4.25346	YES
1516	TraesCS1A02G258800	TraesCS1B02G269400	TraesCS1D02G258800	127.905	155.717	137.085	155.717	YES
1517	TraesCS1A02G259000	TraesCS1B02G269500	TraesCS1D02G258900	8.44606	6.8904	6.95376	8.44606	YES
1518	TraesCS1A02G259200	TraesCS1B02G269600	TraesCS1D02G259000	11.9693	12.7639	13.13	13.13	YES
1519	TraesCS1A02G259500	TraesCS1B02G269800	TraesCS1D02G259300	1.81731	5.33164	1.92684	5.33164	YES
1520	TraesCS1A02G259600	TraesCS1B02G269900	TraesCS1D02G259400	6.5916	4.54063	5.76122	6.5916	YES
1521	TraesCS1A02G259700	TraesCS1B02G270000	TraesCS1D02G259500	31.2429	24.9738	28.0227	31.2429	YES
1522	TraesCS1A02G259800	TraesCS1B02G270100	TraesCS1D02G259600	10.6381	3.21555	5.82761	10.6381	YES
1523	TraesCS1A02G259900	TraesCS1B02G270300	TraesCS1D02G259700	0.680352	0.0154788	0.0108808	0.680352	YES
1524	TraesCS1A02G260000	TraesCS1B02G270400	TraesCS1D02G259900	4.56851	2.94639	4.45582	4.56851	YES
1525	TraesCS1A02G260100	TraesCS1B02G270600	TraesCS1D02G260000	20.9916	27.1434	25.3083	27.1434	YES
1526	TraesCS1A02G260200	TraesCS1B02G270700	TraesCS1D02G260100	5.21213	4.2296	2.23237	5.21213	YES
1527	TraesCS1A02G260300	TraesCS1B02G270800	TraesCS1D02G260200	5.75053	5.27806	5.62497	5.75053	YES
1528	TraesCS1A02G260500	TraesCS1B02G271100	TraesCS1D02G260500	41.6929	29.7964	19.1404	41.6929	YES
1529	TraesCS1A02G260600	TraesCS1B02G271200	TraesCS1D02G260600	1.12034	6.30289	1.01359	6.30289	YES
1530	TraesCS1A02G260700	TraesCS1B02G271300	TraesCS1D02G260700	2.90412	4.00261	0.708974	4.00261	YES
1531	TraesCS1A02G260900	TraesCS1B02G271700	TraesCS1D02G260900	59.6291	42.2425	48.6403	59.6291	YES
1532	TraesCS1A02G261000	TraesCS1B02G271800	TraesCS1D02G261000	42.1484	26.8667	38.9618	42.1484	YES
1533	TraesCS1A02G261100	TraesCS1B02G271900	TraesCS1D02G261100	0.0396586	0.0642204	0.137409	0.137409	NO
1534	TraesCS1A02G261200	TraesCS1B02G272000	TraesCS1D02G261200	0.509846	2.63905	1.00765	2.63905	YES
1535	TraesCS1A02G261300	TraesCS1B02G272100	TraesCS1D02G261300	49.4642	33.349	41.2072	49.4642	YES
1536	TraesCS1A02G261400	TraesCS1B02G272200	TraesCS1D02G261400	0.606786	1.25298	1.5004	1.5004	YES
1537	TraesCS1A02G261500	TraesCS1B02G272300	TraesCS1D02G261500	0.392734	0.631316	0.413554	0.631316	YES
1538	TraesCS1A02G261600	TraesCS1B02G272400	TraesCS1D02G261600	0.676543	0.394735	0.830758	0.830758	YES
1539	TraesCS1A02G261700	TraesCS1B02G272500	TraesCS1D02G261700	0.0170537	0	0.0141691	0.0170537	NO
1540	TraesCS1A02G261800	TraesCS1B02G272600	TraesCS1D02G261800	0.370748	0.660689	0.608355	0.660689	YES
1541	TraesCS1A02G262100	TraesCS1B02G272700	TraesCS1D02G262100	0.59818	4.29984	3.08284	4.29984	YES
1542	TraesCS1A02G262200	TraesCS1B02G272800	TraesCS1D02G262200	8.61982	40.8018	30.3651	40.8018	YES
1543	TraesCS1A02G262300	TraesCS1B02G272900	TraesCS1D02G262300	36.6862	37.4238	57.598	57.598	YES
1544	TraesCS1A02G262400	TraesCS1B02G273000	TraesCS1D02G262500	224.938	338.954	59.6073	338.954	YES
1545	TraesCS1A02G262500	TraesCS1B02G273100	TraesCS1D02G262400	79.4473	221.441	339.852	339.852	YES
1546	TraesCS1A02G262600	TraesCS1B02G273200	TraesCS1D02G262600	7.04708	6.31954	7.26428	7.26428	YES
1547	TraesCS1A02G262700	TraesCS1B02G273300	TraesCS1D02G262700	4.17398	3.15414	1.61689	4.17398	YES
1548	TraesCS1A02G262800	TraesCS1B02G273400	TraesCS1D02G262800	6.57329	8.10488	34.1008	34.1008	YES
1549	TraesCS1A02G262900	TraesCS1B02G273500	TraesCS1D02G262900	61.7306	75.7242	67.6406	75.7242	YES
1550	TraesCS1A02G263000	TraesCS1B02G273600	TraesCS1D02G263100	6.51753	7.29819	6.52766	7.29819	YES
1551	TraesCS1A02G263100	TraesCS1B02G273700	TraesCS1D02G263200	0.081076	0.0740117	0.113938	0.113938	NO
1552	TraesCS1A02G263200	TraesCS1B02G273800	TraesCS1D02G263300	22.732	17.5819	22.1417	22.732	YES
1553	TraesCS1A02G263300	TraesCS1B02G273900	TraesCS1D02G263400	164.306	113.557	129.464	164.306	YES
1554	TraesCS1A02G263400	TraesCS1B02G274000	TraesCS1D02G263600	14.9366	8.33336	24.9233	24.9233	YES
1555	TraesCS1A02G263500	TraesCS1B02G274100	TraesCS1D02G263500	0.164602	2.97251	0.933877	2.97251	YES
1556	TraesCS1A02G263600	TraesCS1B02G274200	TraesCS1D02G263700	0.182868	0.307679	0.241958	0.307679	NO
1557	TraesCS1A02G263700	TraesCS1B02G274300	TraesCS1D02G263800	0.508024	0.385264	1.43468	1.43468	YES
1558	TraesCS1A02G263800	TraesCS1B02G274400	TraesCS1D02G263900	1.47149	2.13799	3.9183	3.9183	YES
1559	TraesCS1A02G263900	TraesCS1B02G274500	TraesCS1D02G264000	0.107639	0.0695388	0.0490769	0.107639	NO
1560	TraesCS1A02G264000	TraesCS1B02G274600	TraesCS1D02G264100	71.2654	75.5631	69.7026	75.5631	YES
1561	TraesCS1A02G264100	TraesCS1B02G274800	TraesCS1D02G264300	17.4965	27.4882	11.3547	27.4882	YES
1562	TraesCS1A02G264200	TraesCS1B02G274900	TraesCS1D02G264400	7.51021	1.95256	1.86743	7.51021	YES
1563	TraesCS1A02G264300	TraesCS1B02G275000	TraesCS1D02G264500	133.278	31.3219	26.7177	133.278	YES
1564	TraesCS1A02G264400	TraesCS1B02G275100	TraesCS1D02G264600	0.514849	0	0	0.514849	YES
1565	TraesCS1A02G264500	TraesCS1B02G275200	TraesCS1D02G264700	1.32798	1.72025	0.723111	1.72025	YES
1566	TraesCS1A02G264600	TraesCS1B02G275300	TraesCS1D02G264800	0	0.241696	0.215239	0.241696	NO
1567	TraesCS1A02G264800	TraesCS1B02G275500	TraesCS1D02G265000	2.63481	4.43839	4.6877	4.6877	YES
1568	TraesCS1A02G264900	TraesCS1B02G275600	TraesCS1D02G265100	3.00744	1.22003	2.01161	3.00744	YES
1569	TraesCS1A02G265000	TraesCS1B02G275700	TraesCS1D02G265200	6.00339	2.55313	3.69778	6.00339	YES
1570	TraesCS1A02G265100	TraesCS1B02G275800	TraesCS1D02G265300	0	0.188924	0.173398	0.188924	NO
1571	TraesCS1A02G265200	TraesCS1B02G276000	TraesCS1D02G265400	0.831419	0.82976	1.03463	1.03463	YES
1572	TraesCS1A02G265600	TraesCS1B02G276500	TraesCS1D02G265800	5.93535	5.57166	11.6512	11.6512	YES
1573	TraesCS1A02G265700	TraesCS1B02G276700	TraesCS1D02G265900	2.24582	0	52.1363	52.1363	YES
1574	TraesCS1A02G265800	TraesCS1B02G276800	TraesCS1D02G266000	34.2517	1.35379	3.22789	34.2517	YES
1575	TraesCS1A02G265900	TraesCS1B02G276900	TraesCS1D02G266100	0.700956	0.66003	0.158934	0.700956	YES
1576	TraesCS1A02G266000	TraesCS1B02G277000	TraesCS1D02G266200	26.6267	28.4625	20.1097	28.4625	YES
1577	TraesCS1A02G266100	TraesCS1B02G277100	TraesCS1D02G266300	2.64987	0.110905	0.539268	2.64987	YES
1578	TraesCS1A02G266200	TraesCS1B02G277200	TraesCS1D02G266400	0.0428004	0.027917	0.0286472	0.0428004	NO
1579	TraesCS1A02G266500	TraesCS1B02G277400	TraesCS1D02G266600	4.03031	4.5283	3.52466	4.5283	YES
1580	TraesCS1A02G266600	TraesCS1B02G277500	TraesCS1D02G266700	102.388	125.014	60.1064	125.014	YES
1581	TraesCS1A02G266700	TraesCS1B02G277600	TraesCS1D02G266900	9.77978	8.11846	7.3063	9.77978	YES
1582	TraesCS1A02G266800	TraesCS1B02G277700	TraesCS1D02G267000	0.685184	0.461152	0.547482	0.685184	YES
1583	TraesCS1A02G266900	TraesCS1B02G277800	TraesCS1D02G267100	9.90937	6.9304	10.1392	10.1392	YES
1584	TraesCS1A02G267200	TraesCS1B02G278100	TraesCS1D02G267300	620.663	456.93	411.459	620.663	YES
1585	TraesCS1A02G267300	TraesCS1B02G278200	TraesCS1D02G267400	31.0536	22.7934	12.6662	31.0536	YES
1586	TraesCS1A02G267600	TraesCS1B02G278300	TraesCS1D02G267500	0.813655	0.321221	0.182728	0.813655	YES
1587	TraesCS1A02G267700	TraesCS1B02G278400	TraesCS1D02G267600	32.0188	12.8803	19.1502	32.0188	YES
1588	TraesCS1A02G267800	TraesCS1B02G278500	TraesCS1D02G267700	37.7521	48.5872	84.9036	84.9036	YES
1589	TraesCS1A02G267900	TraesCS1B02G278600	TraesCS1D02G267800	2.27958	4.02298	2.32896	4.02298	YES
1590	TraesCS1A02G268100	TraesCS1B02G278700	TraesCS1D02G268000	0	0	0	0	NO
1591	TraesCS1A02G268200	TraesCS1B02G278800	TraesCS1D02G268100	9.1262	12.9373	0	12.9373	YES
1592	TraesCS1A02G268300	TraesCS1B02G278900	TraesCS1D02G268200	0	0.0722912	0	0.0722912	NO
1593	TraesCS1A02G268400	TraesCS1B02G279100	TraesCS1D02G268500	5.82024	2.27801	14.9863	14.9863	YES
1594	TraesCS1A02G268500	TraesCS1B02G279200	TraesCS1D02G268600	7.37494	0.82971	6.64675	7.37494	YES
1595	TraesCS1A02G268700	TraesCS1B02G279300	TraesCS1D02G268800	11.1841	7.54633	7.61764	11.1841	YES
1596	TraesCS1A02G268800	TraesCS1B02G279400	TraesCS1D02G268900	0.708711	1.59169	1.02099	1.59169	YES
1597	TraesCS1A02G269000	TraesCS1B02G279500	TraesCS1D02G269100	4.52158	7.18378	4.51562	7.18378	YES
1598	TraesCS1A02G269100	TraesCS1B02G279600	TraesCS1D02G269200	8.2042	7.52583	8.51362	8.51362	YES
1599	TraesCS1A02G269200	TraesCS1B02G279700	TraesCS1D02G269300	5.54807	5.11552	6.12219	6.12219	YES
1600	TraesCS1A02G269300	TraesCS1B02G279800	TraesCS1D02G269400	3.92753	8.89276	0	8.89276	YES
1601	TraesCS1A02G269400	TraesCS1B02G279900	TraesCS1D02G269500	0.125041	0.389261	0.129693	0.389261	NO
1602	TraesCS1A02G269500	TraesCS1B02G280000	TraesCS1D02G269600	2.37871	2.78506	2.99541	2.99541	YES
1603	TraesCS1A02G269600	TraesCS1B02G280100	TraesCS1D02G269700	0.970661	0.397536	0.378408	0.970661	YES
1604	TraesCS1A02G269700	TraesCS1B02G280200	TraesCS1D02G269800	0.996249	0.479779	0.190304	0.996249	YES
1605	TraesCS1A02G269800	TraesCS1B02G280300	TraesCS1D02G269900	0.28557	0.120696	0.38386	0.38386	NO
1606	TraesCS1A02G270000	TraesCS1B02G280400	TraesCS1D02G270000	2.76477	1.15079	4.1606	4.1606	YES
1607	TraesCS1A02G270200	TraesCS1B02G280500	TraesCS1D02G270400	10.6919	6.82569	8.56075	10.6919	YES
1608	TraesCS1A02G270300	TraesCS1B02G280600	TraesCS1D02G270500	8.92189	13.238	15.2555	15.2555	YES
1609	TraesCS1A02G270400	TraesCS1B02G280700	TraesCS1D02G270600	36.3408	43.7136	44.1147	44.1147	YES
1610	TraesCS1A02G270500	TraesCS1B02G280800	TraesCS1D02G270700	9.38814	9.52033	6.44431	9.52033	YES
1611	TraesCS1A02G270600	TraesCS1B02G280900	TraesCS1D02G270800	4.50408	4.20999	4.62902	4.62902	YES
1612	TraesCS1A02G270800	TraesCS1B02G281100	TraesCS1D02G271000	2.53539	1.38497	3.66391	3.66391	YES
1613	TraesCS1A02G270900	TraesCS1B02G281200	TraesCS1D02G271100	0	0.03673	0.163849	0.163849	NO
1614	TraesCS1A02G271700	TraesCS1B02G281600	TraesCS1D02G271800	0.265939	0.390723	0.413265	0.413265	NO
1615	TraesCS1A02G271800	TraesCS1B02G281700	TraesCS1D02G271900	0	0.619655	0.814629	0.814629	YES
1616	TraesCS1A02G272100	TraesCS1B02G282100	TraesCS1D02G272800	5.63061	10.1796	11.7569	11.7569	YES
1617	TraesCS1A02G272200	TraesCS1B02G282200	TraesCS1D02G272700	7.34351	7.97184	5.90099	7.97184	YES
1618	TraesCS1A02G272400	TraesCS1B02G282400	TraesCS1D02G272500	6.50676	7.21385	9.50724	9.50724	YES
1619	TraesCS1A02G272500	TraesCS1B02G282500	TraesCS1D02G272300	5.53273	11.4712	9.96739	11.4712	YES
1620	TraesCS1A02G272700	TraesCS1B02G282700	TraesCS1D02G273000	0	2.80515	0.264977	2.80515	YES
1621	TraesCS1A02G273000	TraesCS1B02G282800	TraesCS1D02G273100	8.33337	9.46154	13.0601	13.0601	YES
1622	TraesCS1A02G273100	TraesCS1B02G282900	TraesCS1D02G273200	23.0875	15.453	16.0103	23.0875	YES
1623	TraesCS1A02G273400	TraesCS1B02G283200	TraesCS1D02G273400	40.8897	25.9669	22.4021	40.8897	YES
1624	TraesCS1A02G273500	TraesCS1B02G283300	TraesCS1D02G273500	51.9442	59.2304	49.0591	59.2304	YES
1625	TraesCS1A02G273600	TraesCS1B02G283400	TraesCS1D02G273600	0.123479	0.161261	0.0865251	0.161261	NO
1626	TraesCS1A02G273800	TraesCS1B02G283500	TraesCS1D02G273900	0.38962	0.231938	0.518207	0.518207	YES
1627	TraesCS1A02G274400	TraesCS1B02G283900	TraesCS1D02G274400	30.8741	38.7616	20.2193	38.7616	YES
1628	TraesCS1A02G274800	TraesCS1B02G284200	TraesCS1D02G274600	3.08711	3.5842	2.58529	3.5842	YES
1629	TraesCS1A02G275000	TraesCS1B02G284300	TraesCS1D02G274700	3.92905	4.3791	2.63273	4.3791	YES
1630	TraesCS1A02G275200	TraesCS1B02G284400	TraesCS1D02G274800	34.0032	28.9955	28.8081	34.0032	YES
1631	TraesCS1A02G275300	TraesCS1B02G284500	TraesCS1D02G274900	4.91717	3.50179	3.21559	4.91717	YES
1632	TraesCS1A02G275400	TraesCS1B02G284600	TraesCS1D02G275000	10.6096	1.88748	4.09696	10.6096	YES
1633	TraesCS1A02G275500	TraesCS1B02G284700	TraesCS1D02G275100	0.566723	0	0.807943	0.807943	YES
1634	TraesCS1A02G275700	TraesCS1B02G284900	TraesCS1D02G275300	9.28126	7.33262	8.80145	9.28126	YES
1635	TraesCS1A02G275800	TraesCS1B02G285000	TraesCS1D02G275400	0.344266	0.425274	0.442927	0.442927	NO
1636	TraesCS1A02G275900	TraesCS1B02G285100	TraesCS1D02G275500	0.111649	0.0410776	0.0256993	0.111649	NO
1637	TraesCS1A02G276100	TraesCS1B02G285300	TraesCS1D02G275600	14.951	8.4009	26.2986	26.2986	YES
1638	TraesCS1A02G276200	TraesCS1B02G285400	TraesCS1D02G275700	0.0920872	0.024253	0.0207073	0.0920872	NO
1639	TraesCS1A02G276300	TraesCS1B02G285500	TraesCS1D02G275800	28.7016	16.954	16.1727	28.7016	YES
1640	TraesCS1A02G276400	TraesCS1B02G285600	TraesCS1D02G275900	5.59496	6.29418	5.12179	6.29418	YES
1641	TraesCS1A02G276500	TraesCS1B02G285700	TraesCS1D02G276000	16.2158	17.4919	17.3844	17.4919	YES
1642	TraesCS1A02G276600	TraesCS1B02G285800	TraesCS1D02G276100	6.51867	5.39147	4.8959	6.51867	YES
1643	TraesCS1A02G276800	TraesCS1B02G285900	TraesCS1D02G276200	0.209358	0.256637	0.0879479	0.256637	NO
1644	TraesCS1A02G276900	TraesCS1B02G286000	TraesCS1D02G276300	0.0202431	0	0.0277092	0.0277092	NO
1645	TraesCS1A02G277000	TraesCS1B02G286100	TraesCS1D02G276400	3.05857	0.633254	1.81217	3.05857	YES
1646	TraesCS1A02G277100	TraesCS1B02G286200	TraesCS1D02G276500	0.51999	0.0254139	0.585092	0.585092	YES
1647	TraesCS1A02G277400	TraesCS1B02G286300	TraesCS1D02G276600	5.10235	4.62382	3.49272	5.10235	YES
1648	TraesCS1A02G277500	TraesCS1B02G286500	TraesCS1D02G276700	413.482	341.694	415.115	415.115	YES
1649	TraesCS1A02G277800	TraesCS1B02G286700	TraesCS1D02G277000	0.311791	3.4506	4.04385	4.04385	YES
1650	TraesCS1A02G278000	TraesCS1B02G286900	TraesCS1D02G277100	16.5753	31.4965	15.3082	31.4965	YES
1651	TraesCS1A02G278100	TraesCS1B02G287000	TraesCS1D02G277200	10.9105	11.2916	8.76785	11.2916	YES
1652	TraesCS1A02G278200	TraesCS1B02G287100	TraesCS1D02G277300	9.72739	11.8596	12.5226	12.5226	YES
1653	TraesCS1A02G278300	TraesCS1B02G287200	TraesCS1D02G277400	13.813	15.4063	21.8926	21.8926	YES
1654	TraesCS1A02G278400	TraesCS1B02G287300	TraesCS1D02G277600	0.411447	3.56189	3.97427	3.97427	YES
1655	TraesCS1A02G278500	TraesCS1B02G287400	TraesCS1D02G277700	1.03291	8.311	10.6101	10.6101	YES
1656	TraesCS1A02G278600	TraesCS1B02G287500	TraesCS1D02G277900	8.41871	14.7252	11.0029	14.7252	YES
1657	TraesCS1A02G278700	TraesCS1B02G287900	TraesCS1D02G278000	0.319499	0	0.162126	0.319499	NO
1658	TraesCS1A02G278800	TraesCS1B02G287800	TraesCS1D02G278100	7.49297	3.62745	3.66814	7.49297	YES
1659	TraesCS1A02G278900	TraesCS1B02G287700	TraesCS1D02G278200	7.74776	6.25297	6.17276	7.74776	YES
1660	TraesCS1A02G279000	TraesCS1B02G288000	TraesCS1D02G278300	2.1351	11.7912	4.19935	11.7912	YES
1661	TraesCS1A02G279100	TraesCS1B02G288100	TraesCS1D02G278400	27.8283	19.8946	17.7208	27.8283	YES
1662	TraesCS1A02G279300	TraesCS1B02G288300	TraesCS1D02G278600	2.16064	1.69291	1.33173	2.16064	YES
1663	TraesCS1A02G279400	TraesCS1B02G288500	TraesCS1D02G278700	0.352055	0.54586	0.885339	0.885339	YES
1664	TraesCS1A02G279500	TraesCS1B02G288600	TraesCS1D02G278800	38.3109	34.7969	42.7236	42.7236	YES
1665	TraesCS1A02G279600	TraesCS1B02G288700	TraesCS1D02G278900	0.706902	1.40575	1.07337	1.40575	YES
1666	TraesCS1A02G279800	TraesCS1B02G288800	TraesCS1D02G279000	1.20142	0.772704	0.637551	1.20142	YES
1667	TraesCS1A02G279900	TraesCS1B02G288900	TraesCS1D02G279100	0.75213	1.66305	1.87092	1.87092	YES
1668	TraesCS1A02G280200	TraesCS1B02G289100	TraesCS1D02G279300	5.52544	7.00565	12.1811	12.1811	YES
1669	TraesCS1A02G280300	TraesCS1B02G289200	TraesCS1D02G279400	8.69	8.69673	8.48923	8.69673	YES
1670	TraesCS1A02G280400	TraesCS1B02G289300	TraesCS1D02G279500	14.8249	20.9949	15.784	20.9949	YES
1671	TraesCS1A02G280500	TraesCS1B02G289500	TraesCS1D02G279600	12.516	13.2686	10.6813	13.2686	YES
1672	TraesCS1A02G280600	TraesCS1B02G289600	TraesCS1D02G279700	11.8147	12.6524	8.37204	12.6524	YES
1673	TraesCS1A02G280700	TraesCS1B02G289700	TraesCS1D02G279800	39.4482	35.2223	10.4885	39.4482	YES
1674	TraesCS1A02G280800	TraesCS1B02G289800	TraesCS1D02G279900	7.80881	7.24586	7.40318	7.80881	YES
1675	TraesCS1A02G280900	TraesCS1B02G289900	TraesCS1D02G280000	6.21976	4.82761	4.25403	6.21976	YES
1676	TraesCS1A02G281000	TraesCS1B02G290000	TraesCS1D02G280200	5.25243	4.34885	8.26396	8.26396	YES
1677	TraesCS1A02G281100	TraesCS1B02G290200	TraesCS1D02G280300	6.40225	4.51359	6.68853	6.68853	YES
1678	TraesCS1A02G281200	TraesCS1B02G290400	TraesCS1D02G280500	8.72576	9.52367	6.58964	9.52367	YES
1679	TraesCS1A02G281300	TraesCS1B02G290500	TraesCS1D02G280600	2.10487	4.40568	1.00708	4.40568	YES
1680	TraesCS1A02G281400	TraesCS1B02G290600	TraesCS1D02G280700	20.0751	28.7969	19.5008	28.7969	YES
1681	TraesCS1A02G281600	TraesCS1B02G290700	TraesCS1D02G280800	13.9499	14.6175	10.7148	14.6175	YES
1682	TraesCS1A02G281700	TraesCS1B02G290800	TraesCS1D02G280900	3.50593	3.32504	2.38785	3.50593	YES
1683	TraesCS1A02G281800	TraesCS1B02G290900	TraesCS1D02G281000	28.1499	27.3011	26.0417	28.1499	YES
1684	TraesCS1A02G281900	TraesCS1B02G291100	TraesCS1D02G281200	0.345925	0.117635	0.0196935	0.345925	NO
1685	TraesCS1A02G282000	TraesCS1B02G291200	TraesCS1D02G281300	5.88498	4.0243	4.39871	5.88498	YES
1686	TraesCS1A02G282100	TraesCS1B02G291300	TraesCS1D02G281400	0.0324421	0.0180441	0	0.0324421	NO
1687	TraesCS1A02G282200	TraesCS1B02G291400	TraesCS1D02G281500	1.94495	0.625292	13.0771	13.0771	YES
1688	TraesCS1A02G282600	TraesCS1B02G291500	TraesCS1D02G281800	31.779	27.5079	39.5542	39.5542	YES
1689	TraesCS1A02G282700	TraesCS1B02G291600	TraesCS1D02G281900	3.1913	7.81577	7.5354	7.81577	YES
1690	TraesCS1A02G282800	TraesCS1B02G291700	TraesCS1D02G282000	0.109918	0.202982	0.0592796	0.202982	NO
1691	TraesCS1A02G282900	TraesCS1B02G291800	TraesCS1D02G282100	1.43944	1.03587	4.87616	4.87616	YES
1692	TraesCS1A02G283000	TraesCS1B02G291900	TraesCS1D02G282200	4.56133	7.25527	3.88877	7.25527	YES
1693	TraesCS1A02G283100	TraesCS1B02G292200	TraesCS1D02G282300	0.0538623	0.182588	0.0768821	0.182588	NO
1694	TraesCS1A02G283200	TraesCS1B02G292300	TraesCS1D02G282400	7.35218	14.3035	8.97711	14.3035	YES
1695	TraesCS1A02G283400	TraesCS1B02G292600	TraesCS1D02G282600	0.0174331	0	0.0300296	0.0300296	NO
1696	TraesCS1A02G283600	TraesCS1B02G292800	TraesCS1D02G282700	2.05165	3.53256	2.70107	3.53256	YES
1697	TraesCS1A02G283700	TraesCS1B02G292900	TraesCS1D02G282800	3.67142	4.3811	1.54427	4.3811	YES
1698	TraesCS1A02G283800	TraesCS1B02G293000	TraesCS1D02G282900	22.9115	20.8673	21.1021	22.9115	YES
1699	TraesCS1A02G283900	TraesCS1B02G293100	TraesCS1D02G283000	0.340489	0.11987	0.134273	0.340489	NO
1700	TraesCS1A02G284000	TraesCS1B02G293300	TraesCS1D02G283100	8.05252	14.2899	6.43603	14.2899	YES
1701	TraesCS1A02G284100	TraesCS1B02G293400	TraesCS1D02G283200	1.39613	1.32689	1.19199	1.39613	YES
1702	TraesCS1A02G284300	TraesCS1B02G293500	TraesCS1D02G283300	11.6698	13.5023	12.0153	13.5023	YES
1703	TraesCS1A02G284400	TraesCS1B02G293700	TraesCS1D02G283400	2.56323	4.07395	3.73037	4.07395	YES
1704	TraesCS1A02G284500	TraesCS1B02G293800	TraesCS1D02G283500	6.04912	6.16345	5.20119	6.16345	YES
1705	TraesCS1A02G284600	TraesCS1B02G293900	TraesCS1D02G283600	7.84487	6.11225	0.652235	7.84487	YES
1706	TraesCS1A02G284700	TraesCS1B02G294000	TraesCS1D02G283700	0	0	0	0	NO
1707	TraesCS1A02G284800	TraesCS1B02G294200	TraesCS1D02G283800	347.799	397.149	454.607	454.607	YES
1708	TraesCS1A02G285000	TraesCS1B02G294300	TraesCS1D02G284000	140.396	149.997	72.4106	149.997	YES
1709	TraesCS1A02G285200	TraesCS1B02G294400	TraesCS1D02G284200	68.5671	69.8333	50.8367	69.8333	YES
1710	TraesCS1A02G285300	TraesCS1B02G294500	TraesCS1D02G284300	1.26067	4.66331	27.5142	27.5142	YES
1711	TraesCS1A02G285400	TraesCS1B02G294600	TraesCS1D02G284400	0.655972	0.622602	0.84109	0.84109	YES
1712	TraesCS1A02G285500	TraesCS1B02G294700	TraesCS1D02G284500	3.51679	2.33334	8.90334	8.90334	YES
1713	TraesCS1A02G285700	TraesCS1B02G295100	TraesCS1D02G284800	0.0368971	0.0216046	0.0153072	0.0368971	NO
1714	TraesCS1A02G286000	TraesCS1B02G295500	TraesCS1D02G285100	26.8112	15.0245	15.4306	26.8112	YES
1715	TraesCS1A02G286200	TraesCS1B02G295600	TraesCS1D02G285200	58.7636	95.4559	114.974	114.974	YES
1716	TraesCS1A02G286300	TraesCS1B02G295700	TraesCS1D02G285300	135.565	155.619	160.263	160.263	YES
1717	TraesCS1A02G286500	TraesCS1B02G295800	TraesCS1D02G285500	0.206191	0.0587722	2.50844	2.50844	YES
1718	TraesCS1A02G286700	TraesCS1B02G296100	TraesCS1D02G285600	0.0516052	0.174831	0.0708307	0.174831	NO
1719	TraesCS1A02G286800	TraesCS1B02G296200	TraesCS1D02G285700	0	0	0.270386	0.270386	NO
1720	TraesCS1A02G286900	TraesCS1B02G296300	TraesCS1D02G285800	130.648	141.878	38.1922	141.878	YES
1721	TraesCS1A02G287000	TraesCS1B02G296400	TraesCS1D02G285900	32.3099	12.6584	12.8344	32.3099	YES
1722	TraesCS1A02G287100	TraesCS1B02G296500	TraesCS1D02G286000	1.86394	2.10601	2.76845	2.76845	YES
1723	TraesCS1A02G287200	TraesCS1B02G296600	TraesCS1D02G286100	1.92314	2.40605	0.229859	2.40605	YES
1724	TraesCS1A02G287300	TraesCS1B02G296700	TraesCS1D02G286200	0.128835	0.174146	0.202446	0.202446	NO
1725	TraesCS1A02G287400	TraesCS1B02G296800	TraesCS1D02G286300	6.84818	6.73842	7.91345	7.91345	YES
1726	TraesCS1A02G287500	TraesCS1B02G296900	TraesCS1D02G286400	8.26678	8.86529	8.43038	8.86529	YES
1727	TraesCS1A02G287600	TraesCS1B02G297000	TraesCS1D02G286500	6.37205	4.62909	4.07406	6.37205	YES
1728	TraesCS1A02G287900	TraesCS1B02G297300	TraesCS1D02G286800	0.0524946	0.0789011	0.0222681	0.0789011	NO
1729	TraesCS1A02G288100	TraesCS1B02G297500	TraesCS1D02G287100	0.0455818	0.139	0.0991715	0.139	NO
1730	TraesCS1A02G288200	TraesCS1B02G297600	TraesCS1D02G287200	5.57484	2.79909	2.29616	5.57484	YES
1731	TraesCS1A02G288300	TraesCS1B02G297700	TraesCS1D02G287300	0.672372	5.16195	11.4885	11.4885	YES
1732	TraesCS1A02G288400	TraesCS1B02G297800	TraesCS1D02G287400	21.39	18.7236	23.1413	23.1413	YES
1733	TraesCS1A02G288500	TraesCS1B02G297900	TraesCS1D02G287500	18.6991	26.7334	11.0718	26.7334	YES
1734	TraesCS1A02G288600	TraesCS1B02G298000	TraesCS1D02G287600	3.63821	2.17977	2.72516	3.63821	YES
1735	TraesCS1A02G288700	TraesCS1B02G298100	TraesCS1D02G287700	2.20283	3.26469	2.64728	3.26469	YES
1736	TraesCS1A02G288900	TraesCS1B02G298200	TraesCS1D02G287900	6.57269	7.97877	7.23505	7.97877	YES
1737	TraesCS1A02G289000	TraesCS1B02G298300	TraesCS1D02G288000	19.9489	19.1938	10.9789	19.9489	YES
1738	TraesCS1A02G289100	TraesCS1B02G298600	TraesCS1D02G288100	1.48976	0.350157	2.85399	2.85399	YES
1739	TraesCS1A02G289200	TraesCS1B02G298800	TraesCS1D02G288200	1.76718	0.27432	4.37076	4.37076	YES
1740	TraesCS1A02G289400	TraesCS1B02G298900	TraesCS1D02G288400	0	0	0	0	NO
1741	TraesCS1A02G289600	TraesCS1B02G299100	TraesCS1D02G288500	0	0.621365	0.0747993	0.621365	YES
1742	TraesCS1A02G290200	TraesCS1B02G299600	TraesCS1D02G289000	0.391507	4.86599	0	4.86599	YES
1743	TraesCS1A02G290300	TraesCS1B02G299500	TraesCS1D02G288900	0.367465	0.822861	6.23225	6.23225	YES
1744	TraesCS1A02G290400	TraesCS1B02G299700	TraesCS1D02G289100	0.858739	1.38386	0.729081	1.38386	YES
1745	TraesCS1A02G290500	TraesCS1B02G299800	TraesCS1D02G289200	12.4864	11.2259	13.9492	13.9492	YES
1746	TraesCS1A02G290700	TraesCS1B02G300000	TraesCS1D02G289300	3.42063	0.671045	4.99656	4.99656	YES
1747	TraesCS1A02G290800	TraesCS1B02G300100	TraesCS1D02G289400	0.831435	0.775321	0.976788	0.976788	YES
1748	TraesCS1A02G290900	TraesCS1B02G300300	TraesCS1D02G289500	0.197308	0.217406	0.0241826	0.217406	NO
1749	TraesCS1A02G291000	TraesCS1B02G300400	TraesCS1D02G289600	0.333675	0.484367	0.0616668	0.484367	NO
1750	TraesCS1A02G291100	TraesCS1B02G300500	TraesCS1D02G289700	0.134919	0.127341	0.015394	0.134919	NO
1751	TraesCS1A02G291200	TraesCS1B02G300600	TraesCS1D02G289800	5.22683	5.44156	14.6288	14.6288	YES
1752	TraesCS1A02G291400	TraesCS1B02G300700	TraesCS1D02G289900	10.9342	13.2293	11.2193	13.2293	YES
1753	TraesCS1A02G291800	TraesCS1B02G301200	TraesCS1D02G290300	0.180741	0.481465	0.591826	0.591826	YES
1754	TraesCS1A02G291900	TraesCS1B02G301300	TraesCS1D02G290400	0.526037	0.837604	0	0.837604	YES
1755	TraesCS1A02G292000	TraesCS1B02G301400	TraesCS1D02G290500	1.40356	2.07585	1.38392	2.07585	YES
1756	TraesCS1A02G292100	TraesCS1B02G301500	TraesCS1D02G290600	4.17413	4.2198	4.1648	4.2198	YES
1757	TraesCS1A02G292200	TraesCS1B02G301600	TraesCS1D02G290700	8.99101	9.31667	2.59192	9.31667	YES
1758	TraesCS1A02G292400	TraesCS1B02G301800	TraesCS1D02G290800	1.86582	0.0797415	0.336187	1.86582	YES
1759	TraesCS1A02G292500	TraesCS1B02G302000	TraesCS1D02G291300	0.115515	0.054721	0	0.115515	NO
1760	TraesCS1A02G293700	TraesCS1B02G302800	TraesCS1D02G298200	0.3348	1.10635	4.79242	4.79242	YES
1761	TraesCS1A02G294100	TraesCS1B02G303800	TraesCS1D02G298100	0	1.82915	1.90051	1.90051	YES
1762	TraesCS1A02G294200	TraesCS1B02G303900	TraesCS1D02G297700	3.71345	5.28303	0	5.28303	YES
1763	TraesCS1A02G294700	TraesCS1B02G304100	TraesCS1D02G297200	29.0821	1.44353	4.43408	29.0821	YES
1764	TraesCS1A02G294800	TraesCS1B02G304200	TraesCS1D02G297300	0.900896	0.932417	0.653757	0.932417	YES
1765	TraesCS1A02G295000	TraesCS1B02G304400	TraesCS1D02G297500	0.0827646	0.0501208	0.0269633	0.0827646	NO
1766	TraesCS1A02G295800	TraesCS1B02G304800	TraesCS1D02G296500	0.679648	0.533938	4.59858	4.59858	YES
1767	TraesCS1A02G296100	TraesCS1B02G304900	TraesCS1D02G296100	9.88448	11.0993	9.67914	11.0993	YES
1768	TraesCS1A02G296200	TraesCS1B02G305000	TraesCS1D02G295900	10.3852	7.70027	11.2977	11.2977	YES
1769	TraesCS1A02G296500	TraesCS1B02G305600	TraesCS1D02G294800	4.42264	2.74564	1.91787	4.42264	YES
1770	TraesCS1A02G296700	TraesCS1B02G305700	TraesCS1D02G294700	0.0369324	0.196327	0.525764	0.525764	YES
1771	TraesCS1A02G296900	TraesCS1B02G305800	TraesCS1D02G294600	0.155274	0.110336	0.383147	0.383147	NO
1772	TraesCS1A02G297000	TraesCS1B02G305900	TraesCS1D02G294500	3.02381	2.61917	4.99679	4.99679	YES
1773	TraesCS1A02G297100	TraesCS1B02G306000	TraesCS1D02G294300	0.801967	0.391624	0.0665485	0.801967	YES
1774	TraesCS1A02G297200	TraesCS1B02G306100	TraesCS1D02G294400	2.02551	1.55762	1.44607	2.02551	YES
1775	TraesCS1A02G297400	TraesCS1B02G306400	TraesCS1D02G294000	0.0623258	0.0183612	0.061792	0.0623258	NO
1776	TraesCS1A02G297500	TraesCS1B02G306500	TraesCS1D02G293900	0.0745319	19.9008	8.4458	19.9008	YES
1777	TraesCS1A02G297600	TraesCS1B02G306800	TraesCS1D02G293600	0.962941	0.305602	1.11563	1.11563	YES
1778	TraesCS1A02G297700	TraesCS1B02G307100	TraesCS1D02G293500	0.0607138	0.0651421	0.0463928	0.0651421	NO
1779	TraesCS1A02G297800	TraesCS1B02G307200	TraesCS1D02G293400	5.15728	7.42506	9.06501	9.06501	YES
1780	TraesCS1A02G297900	TraesCS1B02G307400	TraesCS1D02G293300	36.0508	33.7412	41.9182	41.9182	YES
1781	TraesCS1A02G298000	TraesCS1B02G307500	TraesCS1D02G293200	4.60518	5.22311	4.14765	5.22311	YES
1782	TraesCS1A02G298100	TraesCS1B02G307600	TraesCS1D02G293100	2.32742	2.12478	1.72606	2.32742	YES
1783	TraesCS1A02G298200	TraesCS1B02G307700	TraesCS1D02G293000	0.0474898	0.0604413	0.0616572	0.0616572	NO
1784	TraesCS1A02G298300	TraesCS1B02G307800	TraesCS1D02G292900	0.186188	0.404181	0.143382	0.404181	NO
1785	TraesCS1A02G298600	TraesCS1B02G308200	TraesCS1D02G292700	0.332739	0.543559	0.339626	0.543559	YES
1786	TraesCS1A02G298700	TraesCS1B02G308300	TraesCS1D02G292600	7.42058	5.39961	9.41065	9.41065	YES
1787	TraesCS1A02G298800	TraesCS1B02G308500	TraesCS1D02G292500	7.55995	4.2538	6.14545	7.55995	YES
1788	TraesCS1A02G298900	TraesCS1B02G308600	TraesCS1D02G292400	4.40214	2.70652	5.80255	5.80255	YES
1789	TraesCS1A02G299000	TraesCS1B02G308700	TraesCS1D02G292300	0	0.378687	0.45409	0.45409	NO
1790	TraesCS1A02G299100	TraesCS1B02G308900	TraesCS1D02G292100	14.8597	17.783	6.6768	17.783	YES
1791	TraesCS1A02G299200	TraesCS1B02G309000	TraesCS1D02G292000	0.0612586	1.87822	0.561317	1.87822	YES
1792	TraesCS1A02G299400	TraesCS1B02G309200	TraesCS1D02G298300	7.57242	6.32716	6.57521	7.57242	YES
1793	TraesCS1A02G299500	TraesCS1B02G309300	TraesCS1D02G298400	69.667	76.6	56.3113	76.6	YES
1794	TraesCS1A02G299600	TraesCS1B02G309400	TraesCS1D02G298500	0.924194	1.29372	1.15076	1.29372	YES
1795	TraesCS1A02G299900	TraesCS1B02G309800	TraesCS1D02G299200	7.16872	9.00448	4.53539	9.00448	YES
1796	TraesCS1A02G300000	TraesCS1B02G310100	TraesCS1D02G299400	5.67235	3.86512	0.714164	5.67235	YES
1797	TraesCS1A02G300100	TraesCS1B02G310200	TraesCS1D02G299500	0.187316	0.21005	0.2014	0.21005	NO
1798	TraesCS1A02G300200	TraesCS1B02G310300	TraesCS1D02G299700	21.2889	12.819	15.776	21.2889	YES
1799	TraesCS1A02G300600	TraesCS1B02G310700	TraesCS1D02G300000	0	0.0908903	0.089078	0.0908903	NO
1800	TraesCS1A02G300800	TraesCS1B02G310800	TraesCS1D02G300200	12.1518	13.4042	12.856	13.4042	YES
1801	TraesCS1A02G301200	TraesCS1B02G311000	TraesCS1D02G300900	0	0.0326769	0.35401	0.35401	NO
1802	TraesCS1A02G301300	TraesCS1B02G311100	TraesCS1D02G301000	0.465154	0.178587	0.0576688	0.465154	NO
1803	TraesCS1A02G301400	TraesCS1B02G311200	TraesCS1D02G301100	2.13526	3.82239	2.39455	3.82239	YES
1804	TraesCS1A02G301500	TraesCS1B02G311300	TraesCS1D02G301200	0.53989	0.306017	0.571595	0.571595	YES
1805	TraesCS1A02G301600	TraesCS1B02G311400	TraesCS1D02G301300	181.015	151.76	171.352	181.015	YES
1806	TraesCS1A02G301800	TraesCS1B02G311800	TraesCS1D02G301400	5.06629	4.60572	2.79655	5.06629	YES
1807	TraesCS1A02G302200	TraesCS1B02G312000	TraesCS1D02G301600	0.0247396	0.0226796	0	0.0247396	NO
1808	TraesCS1A02G302300	TraesCS1B02G312100	TraesCS1D02G301700	1.29411	19.8209	7.8118	19.8209	YES
1809	TraesCS1A02G302500	TraesCS1B02G312700	TraesCS1D02G301900	8.31346	7.94686	4.27657	8.31346	YES
1810	TraesCS1A02G302600	TraesCS1B02G312800	TraesCS1D02G302000	1.06839	0.409267	0.231907	1.06839	YES
1811	TraesCS1A02G302700	TraesCS1B02G312900	TraesCS1D02G302100	6.04256	8.7369	9.38263	9.38263	YES
1812	TraesCS1A02G302800	TraesCS1B02G313100	TraesCS1D02G302200	7.15974	11.3582	6.42815	11.3582	YES
1813	TraesCS1A02G302900	TraesCS1B02G313200	TraesCS1D02G302300	70.0946	60.8938	59.5036	70.0946	YES
1814	TraesCS1A02G303000	TraesCS1B02G313300	TraesCS1D02G302400	1.0661	0.244995	0.0991307	1.0661	YES
1815	TraesCS1A02G303300	TraesCS1B02G313700	TraesCS1D02G302800	14.4038	17.0365	16.0708	17.0365	YES
1816	TraesCS1A02G303400	TraesCS1B02G313800	TraesCS1D02G302900	0.0257258	0.0235268	0	0.0257258	NO
1817	TraesCS1A02G303500	TraesCS1B02G313900	TraesCS1D02G303000	0	0	0	0	NO
1818	TraesCS1A02G303600	TraesCS1B02G314000	TraesCS1D02G303100	0.620146	0.109585	0.280867	0.620146	YES
1819	TraesCS1A02G303800	TraesCS1B02G314100	TraesCS1D02G303200	0.0495628	0.0569918	0.0137437	0.0569918	NO
1820	TraesCS1A02G303900	TraesCS1B02G314400	TraesCS1D02G303400	0.594275	0.840151	0.38436	0.840151	YES
1821	TraesCS1A02G304000	TraesCS1B02G314500	TraesCS1D02G303500	0.0249119	0.0824409	0.0320891	0.0824409	NO
1822	TraesCS1A02G304100	TraesCS1B02G314600	TraesCS1D02G303600	0.0795966	0.0152879	0	0.0795966	NO
1823	TraesCS1A02G304200	TraesCS1B02G314700	TraesCS1D02G303700	0.686441	0.422242	0.142959	0.686441	YES
1824	TraesCS1A02G304300	TraesCS1B02G314800	TraesCS1D02G303800	24.5045	33.9002	31.8479	33.9002	YES
1825	TraesCS1A02G304400	TraesCS1B02G314900	TraesCS1D02G303900	8.6092	7.84496	9.75177	9.75177	YES
1826	TraesCS1A02G304900	TraesCS1B02G315700	TraesCS1D02G304700	0.168287	0.130998	0.0525332	0.168287	NO
1827	TraesCS1A02G305200	TraesCS1B02G315900	TraesCS1D02G304800	0.100196	3.07911	5.08407	5.08407	YES
1828	TraesCS1A02G305300	TraesCS1B02G316000	TraesCS1D02G305000	1.94758	6.28769	2.1169	6.28769	YES
1829	TraesCS1A02G305400	TraesCS1B02G316100	TraesCS1D02G305100	2.1054	1.33971	7.11207	7.11207	YES
1830	TraesCS1A02G305500	TraesCS1B02G316200	TraesCS1D02G305200	0.138394	1.33876	0.152608	1.33876	YES
1831	TraesCS1A02G305700	TraesCS1B02G316400	TraesCS1D02G305400	30.0832	26.0915	15.1364	30.0832	YES
1832	TraesCS1A02G305800	TraesCS1B02G316500	TraesCS1D02G305500	1.06566	0.885781	0.747354	1.06566	YES
1833	TraesCS1A02G305900	TraesCS1B02G316600	TraesCS1D02G305600	9.79044	12.4665	7.93958	12.4665	YES
1834	TraesCS1A02G306000	TraesCS1B02G316700	TraesCS1D02G305700	4.73328	5.31144	4.00632	5.31144	YES
1835	TraesCS1A02G306100	TraesCS1B02G316800	TraesCS1D02G305800	13.7104	6.60675	9.7342	13.7104	YES
1836	TraesCS1A02G306300	TraesCS1B02G317100	TraesCS1D02G306000	4.83523	5.14462	4.01295	5.14462	YES
1837	TraesCS1A02G306400	TraesCS1B02G317200	TraesCS1D02G306100	32.2858	39.0055	18.3883	39.0055	YES
1838	TraesCS1A02G306600	TraesCS1B02G317500	TraesCS1D02G306200	0.0796218	0.0415647	0.124756	0.124756	NO
1839	TraesCS1A02G306700	TraesCS1B02G317900	TraesCS1D02G306500	0.263827	0.374065	0.398444	0.398444	NO
1840	TraesCS1A02G307200	TraesCS1B02G318000	TraesCS1D02G306600	1.04241	0.894484	0.877717	1.04241	YES
1841	TraesCS1A02G307300	TraesCS1B02G318100	TraesCS1D02G306700	14.9374	12.891	16.1434	16.1434	YES
1842	TraesCS1A02G307400	TraesCS1B02G318200	TraesCS1D02G306800	338.153	334.285	304.375	338.153	YES
1843	TraesCS1A02G307500	TraesCS1B02G318300	TraesCS1D02G306900	0	0	0	0	NO
1844	TraesCS1A02G307700	TraesCS1B02G318400	TraesCS1D02G307100	28.1049	23.1507	28.329	28.329	YES
1845	TraesCS1A02G307800	TraesCS1B02G318500	TraesCS1D02G307200	4.94266	4.22058	5.35281	5.35281	YES
1846	TraesCS1A02G307900	TraesCS1B02G318600	TraesCS1D02G307300	1.46189	1.09642	1.35335	1.46189	YES
1847	TraesCS1A02G308000	TraesCS1B02G318700	TraesCS1D02G307400	2.38115	2.32438	1.67505	2.38115	YES
1848	TraesCS1A02G308100	TraesCS1B02G318800	TraesCS1D02G307500	20.127	12.4665	7.9409	20.127	YES
1849	TraesCS1A02G308200	TraesCS1B02G318900	TraesCS1D02G307600	9.15496	0.0263878	0.030837	9.15496	YES
1850	TraesCS1A02G308300	TraesCS1B02G319000	TraesCS1D02G307700	0.755068	0.77875	1.31349	1.31349	YES
1851	TraesCS1A02G308400	TraesCS1B02G319100	TraesCS1D02G307800	20.9367	21.594	15.5466	21.594	YES
1852	TraesCS1A02G308500	TraesCS1B02G319200	TraesCS1D02G307900	6.6413	7.16629	3.08601	7.16629	YES
1853	TraesCS1A02G309000	TraesCS1B02G319700	TraesCS1D02G308300	0.147063	0.0262763	0.105429	0.147063	NO
1854	TraesCS1A02G309200	TraesCS1B02G320000	TraesCS1D02G308600	9.22069	6.56613	6.7899	9.22069	YES
1855	TraesCS1A02G309300	TraesCS1B02G320100	TraesCS1D02G308700	0.136452	0.0984648	0.193715	0.193715	NO
1856	TraesCS1A02G309400	TraesCS1B02G320400	TraesCS1D02G308800	2.00852	2.69082	0.923264	2.69082	YES
1857	TraesCS1A02G309500	TraesCS1B02G320500	TraesCS1D02G309000	0.214654	0.256525	0.229815	0.256525	NO
1858	TraesCS1A02G309600	TraesCS1B02G320700	TraesCS1D02G309100	0.22086	0.242058	0.137831	0.242058	NO
1859	TraesCS1A02G309700	TraesCS1B02G320800	TraesCS1D02G309200	129.378	132.783	120.097	132.783	YES
1860	TraesCS1A02G309800	TraesCS1B02G320900	TraesCS1D02G309300	54.9621	29.8457	73.215	73.215	YES
1861	TraesCS1A02G310000	TraesCS1B02G321100	TraesCS1D02G309500	1.55214	7.3245	5.58007	7.3245	YES
1862	TraesCS1A02G310100	TraesCS1B02G321200	TraesCS1D02G309600	0.0925683	0.0275321	0.0786208	0.0925683	NO
1863	TraesCS1A02G310200	TraesCS1B02G321300	TraesCS1D02G309700	0.0412859	0.0386541	0.103516	0.103516	NO
1864	TraesCS1A02G310300	TraesCS1B02G321500	TraesCS1D02G309800	5.01713	1.14144	5.92103	5.92103	YES
1865	TraesCS1A02G310400	TraesCS1B02G321700	TraesCS1D02G309900	1.6472	3.55067	14.7738	14.7738	YES
1866	TraesCS1A02G310500	TraesCS1B02G321800	TraesCS1D02G310000	12.9099	10.2363	10.5165	12.9099	YES
1867	TraesCS1A02G310600	TraesCS1B02G321900	TraesCS1D02G310100	0	0	0	0	NO
1868	TraesCS1A02G310700	TraesCS1B02G322000	TraesCS1D02G310200	7.52064	7.21873	8.87944	8.87944	YES
1869	TraesCS1A02G311000	TraesCS1B02G322400	TraesCS1D02G310900	32.7647	25.9683	25.1402	32.7647	YES
1870	TraesCS1A02G311100	TraesCS1B02G322500	TraesCS1D02G311000	0.338765	0.546726	0.874473	0.874473	YES
1871	TraesCS1A02G311200	TraesCS1B02G322600	TraesCS1D02G311100	0.349591	0.347809	0.122165	0.349591	NO
1872	TraesCS1A02G311300	TraesCS1B02G322800	TraesCS1D02G311300	3.82623	5.50304	4.63212	5.50304	YES
1873	TraesCS1A02G311400	TraesCS1B02G322900	TraesCS1D02G311400	29.6598	32.0502	28.8113	32.0502	YES
1874	TraesCS1A02G311700	TraesCS1B02G323400	TraesCS1D02G312000	0	0.242373	0.161782	0.242373	NO
1875	TraesCS1A02G311800	TraesCS1B02G323500	TraesCS1D02G312100	6.9845	10.6622	11.9356	11.9356	YES
1876	TraesCS1A02G311900	TraesCS1B02G323600	TraesCS1D02G312200	0.368462	0.141886	1.76523	1.76523	YES
1877	TraesCS1A02G312000	TraesCS1B02G323700	TraesCS1D02G312300	0.144568	0.354481	0.686404	0.686404	YES
1878	TraesCS1A02G312300	TraesCS1B02G324000	TraesCS1D02G312500	0.0229953	0.0494924	0.0298709	0.0494924	NO
1879	TraesCS1A02G312600	TraesCS1B02G324200	TraesCS1D02G312700	0.112028	0.051978	0	0.112028	NO
1880	TraesCS1A02G312700	TraesCS1B02G324300	TraesCS1D02G312800	4.2664	4.86607	1.19615	4.86607	YES
1881	TraesCS1A02G313100	TraesCS6B02G252600	TraesCS2D02G555100	0	0	0	0	NO
1882	TraesCS1A02G313200	TraesCS1B02G325000	TraesCS1D02G313700	3.46741	3.49985	3.84838	3.84838	YES
1883	TraesCS1A02G313300	TraesCS1B02G325100	TraesCS1D02G313800	34.0222	32.8928	25.5323	34.0222	YES
1884	TraesCS1A02G313400	TraesCS1B02G325200	TraesCS1D02G313900	4.18902	1.42113	2.1017	4.18902	YES
1885	TraesCS1A02G313500	TraesCS1B02G325300	TraesCS1D02G314000	4.05015	3.23544	1.77043	4.05015	YES
1886	TraesCS1A02G313600	TraesCS1B02G325400	TraesCS1D02G314100	0.0294046	0.0317485	0.631526	0.631526	YES
1887	TraesCS1A02G313700	TraesCS1B02G325500	TraesCS1D02G314200	3.23579	2.7381	4.86647	4.86647	YES
1888	TraesCS1A02G313800	TraesCS1B02G325700	TraesCS1D02G314300	0.0904569	1.32886	0.105206	1.32886	YES
1889	TraesCS1A02G314000	TraesCS1B02G326100	TraesCS1D02G314400	3.57233	6.70312	4.05267	6.70312	YES
1890	TraesCS1A02G314100	TraesCS1B02G326400	TraesCS1D02G314600	18.0445	20.7807	22.2109	22.2109	YES
1891	TraesCS1A02G314200	TraesCS1B02G326500	TraesCS1D02G314700	7.70829	4.44334	8.15302	8.15302	YES
1892	TraesCS1A02G314300	TraesCS1B02G326600	TraesCS1D02G314800	28.8117	37.8324	33.9298	37.8324	YES
1893	TraesCS1A02G314400	TraesCS1B02G326700	TraesCS1D02G314900	5.63913	5.97525	5.69764	5.97525	YES
1894	TraesCS1A02G315200	TraesCS1B02G327100	TraesCS1D02G315400	3.60611	4.3068	7.70301	7.70301	YES
1895	TraesCS1A02G315300	TraesCS1B02G327200	TraesCS1D02G315500	2.28493	0.977783	0.184177	2.28493	YES
1896	TraesCS1A02G315400	TraesCS1B02G327300	TraesCS1D02G315600	9.35134	7.66463	6.48659	9.35134	YES
1897	TraesCS1A02G315500	TraesCS1B02G327400	TraesCS1D02G315700	2.31924	0.761523	1.34869	2.31924	YES
1898	TraesCS1A02G315600	TraesCS1B02G327500	TraesCS1D02G315800	2.52754	5.20609	2.61629	5.20609	YES
1899	TraesCS1A02G315700	TraesCS1B02G327900	TraesCS1D02G315900	0	0.144406	0.183725	0.183725	NO
1900	TraesCS1A02G315900	TraesCS1B02G328200	TraesCS1D02G316200	8.34988	1.0184	9.00515	9.00515	YES
1901	TraesCS1A02G316900	TraesCS1B02G329300	TraesCS1D02G316900	190.876	61.9317	109.104	190.876	YES
1902	TraesCS1A02G317000	TraesCS1B02G329400	TraesCS1D02G317000	9.06188	9.02371	6.87965	9.06188	YES
1903	TraesCS1A02G317100	TraesCS1B02G329500	TraesCS1D02G317100	3.75051	3.94391	2.83307	3.94391	YES
1904	TraesCS1A02G317300	TraesCS1B02G329700	TraesCS1D02G317200	0.0159272	0.019319	0.0279659	0.0279659	NO
1905	TraesCS1A02G317900	TraesCS1B02G330400	TraesCS1D02G317700	0.359091	0.40422	0.558706	0.558706	YES
1906	TraesCS1A02G319000	TraesCS1B02G331300	TraesCS1D02G318800	0.251217	1.35352	1.2448	1.35352	YES
1907	TraesCS1A02G319100	TraesCS1B02G331400	TraesCS1D02G318900	7.62795	7.80952	10.1891	10.1891	YES
1908	TraesCS1A02G319400	TraesCS1B02G331700	TraesCS1D02G319200	1.03525	0	4.85476	4.85476	YES
1909	TraesCS1A02G319500	TraesCS1B02G331800	TraesCS1D02G319300	20.6918	13.7384	30.9932	30.9932	YES
1910	TraesCS1A02G319600	TraesCS1B02G331900	TraesCS1D02G319400	4.13148	3.62867	3.01656	4.13148	YES
1911	TraesCS1A02G319700	TraesCS1B02G332000	TraesCS1D02G319500	0.0185843	0	0.0209295	0.0209295	NO
1912	TraesCS1A02G319800	TraesCS1B02G332100	TraesCS1D02G319600	1.00774	1.78554	1.95675	1.95675	YES
1913	TraesCS1A02G320000	TraesCS1B02G332200	TraesCS1D02G319700	0.096931	0.0120966	0	0.096931	NO
1914	TraesCS1A02G320200	TraesCS1B02G332400	TraesCS1D02G320000	7.85005	9.20951	9.92153	9.92153	YES
1915	TraesCS1A02G320300	TraesCS1B02G332500	TraesCS1D02G320100	0.0250245	0.268886	0.103611	0.268886	NO
1916	TraesCS1A02G320400	TraesCS1B02G332600	TraesCS1D02G320200	0.0092921	0.0272276	0	0.0272276	NO
1917	TraesCS1A02G320500	TraesCS1B02G332700	TraesCS1D02G320300	22.2112	17.7984	10.6045	22.2112	YES
1918	TraesCS1A02G320900	TraesCS1B02G333300	TraesCS1D02G320800	1.19659	1.30447	2.00074	2.00074	YES
1919	TraesCS1A02G321000	TraesCS1B02G333600	TraesCS1D02G321100	20.235	12.7744	22.8006	22.8006	YES
1920	TraesCS1A02G321100	TraesCS1B02G333800	TraesCS1D02G321300	71.5689	0.648297	1.06779	71.5689	YES
1921	TraesCS1A02G321200	TraesCS6B02G384600	TraesCS6D02G334100	0	0	0	0	NO
1922	TraesCS1A02G321600	TraesCS1B02G334000	TraesCS1D02G321700	0.579276	0.586029	0	0.586029	YES
1923	TraesCS1A02G321700	TraesCS1B02G334100	TraesCS1D02G322000	1.92376	2.42735	1.20872	2.42735	YES
1924	TraesCS1A02G321900	TraesCS1B02G334200	TraesCS1D02G322100	8.00519	18.5831	9.00659	18.5831	YES
1925	TraesCS1A02G322000	TraesCS1B02G334400	TraesCS1D02G322200	0	0	0	0	NO
1926	TraesCS1A02G322100	TraesCS1B02G334500	TraesCS1D02G322300	1.83008	1.60798	2.5536	2.5536	YES
1927	TraesCS1A02G322300	TraesCS1B02G334600	TraesCS1D02G322400	8.87864	13.3465	11.3205	13.3465	YES
1928	TraesCS1A02G322400	TraesCS1B02G334700	TraesCS1D02G322500	1.23467	0.886623	0.701537	1.23467	YES
1929	TraesCS1A02G322600	TraesCS1B02G334900	TraesCS1D02G322600	11.3109	10.9122	10.0426	11.3109	YES
1930	TraesCS1A02G322700	TraesCS1B02G335000	TraesCS1D02G323100	2.78218	3.28194	2.86815	3.28194	YES
1931	TraesCS1A02G323000	TraesCS1B02G335800	TraesCS1D02G323500	0.137213	0.106422	0.2958	0.2958	NO
1932	TraesCS1A02G323200	TraesCS1B02G336000	TraesCS1D02G323900	44.7054	42.3126	49.9496	49.9496	YES
1933	TraesCS1A02G323300	TraesCS1B02G336200	TraesCS1D02G324000	6.06138	2.62123	4.44345	6.06138	YES
1934	TraesCS1A02G323400	TraesCS1B02G336300	TraesCS1D02G324200	22.7378	12.411	20.5145	22.7378	YES
1935	TraesCS1A02G323500	TraesCS1B02G336400	TraesCS1D02G324400	2.86406	3.36919	3.10818	3.36919	YES
1936	TraesCS1A02G323700	TraesCS1B02G336900	TraesCS1D02G325000	0.404706	0.531477	0.526683	0.531477	YES
1937	TraesCS1A02G323800	TraesCS1B02G337100	TraesCS1D02G325100	3.01097	3.52956	6.25204	6.25204	YES
1938	TraesCS1A02G323900	TraesCS1B02G337200	TraesCS1D02G325200	4.73728	5.48585	8.03613	8.03613	YES
1939	TraesCS1A02G324000	TraesCS1B02G337400	TraesCS1D02G325300	14.6333	14.4313	8.80507	14.6333	YES
1940	TraesCS1A02G324800	TraesCS1B02G337800	TraesCS1D02G325500	34.051	31.9041	38.6386	38.6386	YES
1941	TraesCS1A02G325000	TraesCS1B02G338000	TraesCS1D02G325700	0.580208	0.182568	0.30424	0.580208	YES
1942	TraesCS1A02G325100	TraesCS1B02G338100	TraesCS1D02G325800	0.0902269	0.213655	0	0.213655	NO
1943	TraesCS1A02G325400	TraesCS1B02G338500	TraesCS1D02G327000	9.74815	5.45248	12.9116	12.9116	YES
1944	TraesCS1A02G325500	TraesCS1B02G338600	TraesCS1D02G327100	0.966142	1.07668	1.15495	1.15495	YES
1945	TraesCS1A02G325600	TraesCS1B02G338800	TraesCS1D02G327200	100.287	225.496	105.687	225.496	YES
1946	TraesCS1A02G325700	TraesCS1B02G338900	TraesCS1D02G327400	0	0	0	0	NO
1947	TraesCS1A02G325800	TraesCS1B02G339100	TraesCS1D02G327600	0.401318	0.767342	0.620914	0.767342	YES
1948	TraesCS1A02G325900	TraesCS1B02G339200	TraesCS1D02G327700	14.3282	13.5103	10.1903	14.3282	YES
1949	TraesCS1A02G326000	TraesCS1B02G339300	TraesCS1D02G327800	0.139184	0	0.0646621	0.139184	NO
1950	TraesCS1A02G326100	TraesCS1B02G339500	TraesCS1D02G328000	1.70152	3.90511	1.20762	3.90511	YES
1951	TraesCS1A02G326200	TraesCS1B02G339600	TraesCS1D02G328300	2.8232	0.829185	1.58311	2.8232	YES
1952	TraesCS1A02G326500	TraesCS1B02G339900	TraesCS7D02G304600	0.114066	2.41101	7.3964	7.3964	YES
1953	TraesCS1A02G326600	TraesCS1B02G340000	TraesCS1D02G328700	0.0751133	0.0350842	0	0.0751133	NO
1954	TraesCS1A02G326700	TraesCS1B02G340100	TraesCS1D02G328800	0	0	0	0	NO
1955	TraesCS1A02G326800	TraesCS1B02G340200	TraesCS1D02G328900	0	0	0.0440349	0.0440349	NO
1956	TraesCS1A02G326900	TraesCS1B02G340300	TraesCS1D02G329000	44.2079	53.0233	48.9763	53.0233	YES
1957	TraesCS1A02G327000	TraesCS1B02G340400	TraesCS1D02G329100	5.18024	4.32654	4.639	5.18024	YES
1958	TraesCS1A02G327100	TraesCS1B02G340500	TraesCS1D02G329200	6.91371	8.14413	6.84322	8.14413	YES
1959	TraesCS1A02G327200	TraesCS1B02G340600	TraesCS1D02G329300	32.3637	39.046	45.5033	45.5033	YES
1960	TraesCS1A02G327400	TraesCS1B02G340800	TraesCS1D02G329400	0.548985	0.413793	0.327606	0.548985	YES
1961	TraesCS1A02G327600	TraesCS1B02G340900	TraesCS1D02G329600	0.899168	3.59762	0.988078	3.59762	YES
1962	TraesCS1A02G327700	TraesCS1B02G341000	TraesCS1D02G329700	5.2068	7.09247	5.96947	7.09247	YES
1963	TraesCS1A02G327800	TraesCS1B02G341100	TraesCS1D02G329800	19.7981	19.6835	19.516	19.7981	YES
1964	TraesCS1A02G327900	TraesCS1B02G341500	TraesCS1D02G330000	1.10564	2.96523	0.623845	2.96523	YES
1965	TraesCS1A02G328000	TraesCS1B02G341700	TraesCS1D02G330500	0.266991	0.0784922	0.191019	0.266991	NO
1966	TraesCS1A02G328100	TraesCS1B02G341900	TraesCS1D02G330600	1.89531	0.253876	1.15892	1.89531	YES
1967	TraesCS1A02G328200	TraesCS1B02G342000	TraesCS1D02G330700	2.05683	2.25974	2.70503	2.70503	YES
1968	TraesCS1A02G328300	TraesCS1B02G342100	TraesCS1D02G330800	0.911398	0.895296	0.613312	0.911398	YES
1969	TraesCS1A02G328700	TraesCS1B02G342400	TraesCS1D02G331000	7.45751	10.5958	9.9079	10.5958	YES
1970	TraesCS1A02G328800	TraesCS1B02G342500	TraesCS1D02G331100	0.0256261	0	0.0248213	0.0256261	NO
1971	TraesCS1A02G329000	TraesCS1B02G311600	TraesCS1D02G335600	0	0	0.120965	0.120965	NO
1972	TraesCS1A02G329200	TraesCS1B02G342600	TraesCS1D02G331300	5.91742	7.70712	8.90501	8.90501	YES
1973	TraesCS1A02G329300	TraesCS1B02G342700	TraesCS1D02G331400	6.70104	2.76604	2.9156	6.70104	YES
1974	TraesCS1A02G329400	TraesCS1B02G342800	TraesCS1D02G331500	2.14677	3.39277	1.9802	3.39277	YES
1975	TraesCS1A02G329500	TraesCS1B02G343000	TraesCS1D02G331600	0.905268	0.0205086	0.28712	0.905268	YES
1976	TraesCS1A02G329600	TraesCS1B02G343100	TraesCS1D02G331700	10.8132	7.11924	2.14415	10.8132	YES
1977	TraesCS1A02G330100	TraesCS1B02G343700	TraesCS1D02G332500	44.7743	64.6323	39.9821	64.6323	YES
1978	TraesCS1A02G330200	TraesCS1B02G343800	TraesCS1D02G332600	16.3108	15.7248	17.2749	17.2749	YES
1979	TraesCS1A02G330300	TraesCS1B02G343900	TraesCS1D02G332700	13.7991	15.7739	10.9946	15.7739	YES
1980	TraesCS1A02G330500	TraesCS1B02G344100	TraesCS1D02G332900	35.1999	28.4963	29.8612	35.1999	YES
1981	TraesCS1A02G330600	TraesCS1B02G344200	TraesCS1D02G333000	11.8342	11.7702	11.3567	11.8342	YES
1982	TraesCS1A02G330700	TraesCS1B02G344400	TraesCS1D02G333200	11.3884	1.50968	11.4711	11.4711	YES
1983	TraesCS1A02G330800	TraesCS1B02G344600	TraesCS1D02G333700	0.69173	0.991805	0.428009	0.991805	YES
1984	TraesCS1A02G330900	TraesCS1B02G344900	TraesCS1D02G333500	7.03898	4.00771	3.12298	7.03898	YES
1985	TraesCS1A02G331100	TraesCS1B02G345000	TraesCS1D02G333800	0.0356108	0.0215428	0.0596333	0.0596333	NO
1986	TraesCS1A02G331200	TraesCS1B02G345100	TraesCS1D02G333900	7.42992	4.27968	7.16045	7.42992	YES
1987	TraesCS1A02G331500	TraesCS1B02G345200	TraesCS1D02G334000	0.992368	12.198	1.20154	12.198	YES
1988	TraesCS1A02G331700	TraesCS1B02G345300	TraesCS1D02G334200	6.33952	4.79048	4.99752	6.33952	YES
1989	TraesCS1A02G331800	TraesCS1B02G345400	TraesCS1D02G334400	2.98465	4.22776	2.56351	4.22776	YES
1990	TraesCS1A02G332000	TraesCS1B02G345700	TraesCS1D02G334700	0.197816	0.214029	0.0740313	0.214029	NO
1991	TraesCS1A02G332200	TraesCS1B02G345800	TraesCS1D02G334800	0.643432	1.57723	0.705036	1.57723	YES
1992	TraesCS1A02G332300	TraesCS1B02G345900	TraesCS1D02G334900	4.15167	16.6065	10.0545	16.6065	YES
1993	TraesCS1A02G332400	TraesCS1B02G346100	TraesCS1D02G335100	10.4643	13.4762	11.7605	13.4762	YES
1994	TraesCS1A02G332500	TraesCS1B02G346200	TraesCS1D02G335200	97.69	74.3135	89.8741	97.69	YES
1995	TraesCS1A02G332600	TraesCS1B02G346300	TraesCS1D02G335300	5.15281	3.41034	3.14048	5.15281	YES
1996	TraesCS1A02G332900	TraesCS1B02G346500	TraesCS1D02G335700	6.87232	6.77967	8.80791	8.80791	YES
[truncated: 17,805 more rows]

## Sheet: Gene categories
Gene category assignment based on the sub-genome of origin and triad description.
Gene sub-genome	Triad description	Gene category
A	Balanced	Balanced
B	Balanced	Balanced
D	Balanced	Balanced
A	A.dominant	Dominant
A	B.suppressed	Dominant
A	D.suppressed	Dominant
B	B.dominant	Dominant
B	A.suppressed	Dominant
B	D.suppressed	Dominant
D	D.dominant	Dominant
D	A.suppressed	Dominant
D	B.suppressed	Dominant
A	B.dominant	Suppressed
A	D.dominant	Suppressed
A	A.suppressed	Suppressed
B	A.dominant	Suppressed
B	D.dominant	Suppressed
B	B.suppressed	Suppressed
D	A.dominant	Suppressed
D	B.dominant	Suppressed
D	D.suppressed	Suppressed
